# Supplementary material
Source: publisher figshare collection journal article supplement (https://tandf.figshare.com/articles/dataset/_/19427003)
Supplement: Supplementary file 1 [file 1]

## Sheet: Table S9
Table S9. Sequences of target genes for differentially express miRNAs.
Isoform ID	Sequence
Isoform_10016	ACTCAACCCTTGATTCATCTTCATTACCATTCTCTATACATAATTGGGAACCAGAAGGTGGGTTCCCAATGAGGATTCGTCCTGTTTGTCCCGGAACACTTCTGGGTTTCTGGGTATGTTTAGTACTGCTATTCTCTGTGAGCTTTTGCCATGCAGATGACAAATCAGTTGAGGTAGTTGGTTTTGGAGAATGTGCTGATTGTTCCCAGAGTAAATTTAAGGCTAGCCAAGCTTTTTCAGGACTACGCATAACAATTGATTGCAAGTCTAAAAATGGACACTTTCAAACAAGAGGTACTGGAGAGCTGGATAAACAAGGAAAGTTCAAAGTATCTCTCCCTCAAGAGTTGGTTCAAGAGGGTAAACTAAAAGAGGAATGCTTTGCACAGCTTCACAGTG…
Isoform_10102	GTCACTTTCTTGAGACACTAGGGTTTCATTTTGTTAGCTCCCACGAAGTTTCTGGACCTCATTATCTTCACCGTTCAGGTGGTCGTAAACCCTCCATGTGAGATTTAGACCTTCCTCTCTTGGATTTCTATCAGGTTGATCAATGAAGCTTTGAATTGGGCTATAGGGTTAGGGATTTGATTGTACAGATTTAATTCGTTATAAAAGTTTCCGAGTTTCTGTGATATATATAAGGGAGCAGAGAAGTTTTTTGTAGAATAGATGTGTTCAGAGTTATGAGATATTCTCCCGGACATGTGGTGGTGACGGGCATGTTCTGTATTACAAAAGTTCATTTTATTTAATAGGGTAAGATGCCTTCTCCTTATCTTTCAAGATTTAGAATTGCAGCCTGGCATG…
Isoform_10107	GTGCCATCTAAATAATGGAAACTGCAAGGGAGGATGATATTGAGGACATGTCATTGTCCCCTCCAACTATGGGTTCCATGCAAATTGCAGGGAGCAATGGCTTTGGTCACAATATAGACTTCATGTCTCAAGCCTGTCTTAGAAATAGGAACTCAGAGATTGACATAGAGGATGAGAGTTCTTATATCAACATCGATCGACCTCTTCCCATATATCTCAAGTTTGAAGATGTCGAATATAAGGTGCGAAATAGCAAGGCATTGTCTAACAATCCTGTCAAGGCAGTAGTGTCGAAGGTAGCCACACAACCCGGTGAGGAACATGGTAAATACAAGCAGATCCTGAAGGGTGTAACTGGAAGCATTGGCCCTGGTGAAATCCTTGCTTTGATGGGTCCTT…
Isoform_10228	GCGTTCTCTTTCTGAATCATGCGATGATATACAATTAATATCTCCTCAAATCCCTCACAAAATCTCTAATCATACTCCCCAGATATCTCCAACGCATATCTCTTCACAAATCTCAACGCGTCAACATATTCCGCAGATCTCTCCCAAGCATCCATTAATTCCATCATTTAATACACCCAATCACGCACAAATATTTGATTCTGTGTGTGTCAACGATTCTTTGCGTGTCTATCAGCGCCGTGTTAATAATTCCCTTCCTCATGTCAACGCAAATCACTCCAATTCACAATTTCTCTCCGTCAACACAACCTCTTCACCTCACAAAAATTCCAATTCTGCAAATTCAGATATTAATTCCCAAAGTCATCTCACTAATGATTCCATATCTGAATCCTCGCC…
Isoform_104	ttgctgaGGGATCTGACAAGAGGGGACCATCATCTATAACCACTCATTGTCCTGAAGCAAATCTAGAACATACTTTCTTGAGAAAGAGAAATTCCTTTATGAGATCGAGCACTTCAATGCCAAGAAAGTACCGTAGTTGACCTAAGTGCTTCACCCCAATTTCTTTACCCAAGGAGACTTTAATTACCTGCACAATCATCACCTATAGAATCATCACCTATAATGATGATATCATCAACATAAACAAGCAGGCAGGTACACTTTCTAGATACTCTTCGCACAAATACTGTGTGATCTGAATGGCATCGAGTGAACCCTACCATAAATAAGTACTACCTCACTAAATCTTTGAAATCAGGCTCGCGGTGACTGCTTCAAGCCATATAGTGACTTCCGAAG…
Isoform_10551	TAAGAATGTTTTTCTTAATGGTGATCTTGATGAAGTCATTTATATATGTACTCCGTCAGATTTTCAGGCTCAGAGGGAGTATCGTGGTAAAGTGTGTCGCCTTAGAAAATCCCTTTATGGTTTGAAGCAGTCACGGAGAGCTTGGTTTGGTAGATTCAGCACAGTAGTTCTCTCATTGGGATTCACACGCTGCCATTCAGACCATACATGCTTCATAAGGCAGAGTTCCACGGGACAACTTGTCATCTTTCTTGTCTATGTGGATGATATAATTCTTACTGGTGATGATCTTCATGGTATTTCTCAAGTTAAGCAGCAGCTGGGGAAGTTTTTTGATGTCAAGGATCTTGGTAATCTTCGTTATTTCCTAGGAATTGAGGTGGCTCGTTCTCAAAAAGG…
Isoform_10768	ATTTTGGTGTGACAAAGAGGCGGTGAGGTTGGCGATCCTTGATGCAGTGACGCCTTTTCGCACAGATTCAGTGGGTAATTTTTTTGGCCGGCGAAACGTTTCTGATAAATGAACGGCGAGAGTGAAGTCGCGGCAGCTCCGGCGGCCCCACCGCAGCCGCTTGAGTGGAAATTCTCTCAGGTCTTTGGCGAACGGACGGCCGGTGAAGAAGTTCAGGAAGTCGACATCATTTCAGCGATTGAGTTTGATAAAACTGGAGACCATCTTGCTACTGGTGATCGTGGGGGGCGGGTGGTTCTGTTTGAGAGGACTGATATAAAGGATCATGGCGGATCCAGAAAAGATATGGAGAAGATGGATTATGCAGTTAGTAAGCATCCTGAGTTCCGTTATAAAACA…
Isoform_10973	gtaGTATAGAGACATTTAAGAGAGGGAAGTCAAAAGAATTTCTCTCGAAGTATTTGATTTATCAACATACAGCTATATACGTATTACATACAGATCTATCAGTTTTGGAAAGTTTTCAGTGGAGGGATCTCCTCTACTGAAAGTTGATTTAGTTGTAGATTTACTTAGATTCTTTTTTGTGTTTACAAGATTTGGAAAGCCATGACTTTGGCCGAATTCCCGACCACCATGTCTGCATTTCCACGGACGCTTTACTCCATTGCAGTTTCAGTGGGAGGGCTCGCTCTGTTCTTGATTTTTGCTTCCTGGCTTTTACTATCACACCCAATTGGTTCAACAGTTGGTGGGTATTTTAACACTGTAGATGAATCCACTATATTGAATTTGTGCAATCAAAGC…
Isoform_11055	GTCACTTTTTCTTGAGATACTAGGGTTTCATTTTGTTAGCTCCCACGAAGTTTCTGGACCTCATTATCTTCACCGTTCAGGTGGTCGTAAACCCTCCATGTGAGATTTAGACCTTCCTCTCTTGGATTTCTATCAGGTTGATCAATGAAGCTTTGAATTGGGCTATAGGGTTAGGGATTTGATTGTACAGATTTAATTCGTTATAAAAGTTTCCGAGTTTCTGTGATATATATAAGGGAGCAGAGAAGTTTTTTGTAGAATAGATGTGTTCAGAGTTATGAGATATTCTCCCGGACATGTGGTGGTGACGGGCATGTTCTGTATTACAAAAGTTCATTTTATTTAATAGGGTAAGATGCCTTCTCCTTATCTTTCAAGATTTAGAATTGCAGCCTGGCA…
Isoform_11094	CAAACCGGGCACTACGGTAAGACGTGAAAACACCCGATCCCATTCCGACCTCGATATGTGGAATCGTCTTGCGCCATATGTACTGAGATTGTTCGGGAGACATGGTCCAAGCCCGGTGAAGAAATGCAAATGGAAAAAGAAAAGATTCGTTTGTTCCCCAGTGCGGTGCCGGCCCGCCAATCACACAGGAATAACCGCGCTAGCCAACATGCTGGATTCTCTACTGGTTACTCTTGTGTCTTCAGAAGACCTGTTCGATAGGAGTTCGTTTCTTCGGTTTTTTCCTCACCAGATGTAGCGATAGGAAGAAAGAAAGACGCTACCTGGTGACAGTCTTTCTCTTTCTTCTGTCTAAAATAAAAAGAAAAAACACACAATTATGCGAAAACTATTTTCACT…
Isoform_11176	gCTCCACGTTCGTCACCGTCGCCGGAGAGTCGGAGACCACCCCCTCCCTCCCCATGGATCTCCACCAGCGACCAGCCAAGCCCCTTCGTTCCAATTTCTCATCAACCCAACAACCCCTCAAGCCTCACCACCGCAAGATTGATGACAACGAATCTGCAAAAGCCTCAGACGCATTGCCTCTTCCTTTATACCTCACCAATGCCGTCTTCTTGACCCTCTTCTTCTCCGTTGTTTACTTCCTCCTCCAACGCTGGCGCGAGAAGATCCGTACCTCTACTCCTCTCCACGTTGTCACCTTCTCTGAGATCGCTGCCATTGTCGCCTTCGTTGCTTCATTTATCTACCTCCTCGCTTCTTTGGCATCGATTTCGTCCAGTCGTTCCTTCGCGCTTCTCATGA…
Isoform_11244	CAACATACAATTCCACCGATAAAGTTATGTCCTGTGATTTACCCAACTCAGTTCCCTTGGAGTTTGTCCATGCAAAGTCACCTGAAATTGTTGGAAAATCTGATCCAGGCACCTCACCAGGCACCGACAATGATAACATTCTTGAAGCTTCGCTTTTAGAATCTGTTATTAGTGATCCATCATCCTCTGGCTCCAAAATTTCCAATTCACAGGATCCATTTGGAGACAAATTTGTAAGCAGTGTTTGTGAGTCTCAAGAATCTCCTGTGGAATTTTCGGGTTTTCAGTCAAATAGATTATGGACAAATGGGGGTCTTTTAGGTCTTGAGCCATCAAAACCTCGAGATTTTGTGACTAGAAGTAAAGATGACAACTTAAGTACTTCAGGTTACCCTGGAA…
Isoform_11317	ATACTTACAGAGAGGTAGACTACATGAGATAGAAGCCAGAGAGAGAGTTCTTGAGAGTCGGTCTAGGAAAGCGAGAATTTGGGCGAGAAATGAGAGAGAGAAAATTTATTCAGAGTGCTTAGATTTGCATGCGTTTGAATTTGAAAAAAAAAACTAAATATACAACTATATTTATGGATTGTTTCTTGTGATCTGTCTCTCAGACAACAACAACTGGGTTGGAAAAAATCCGAAGCCCATCAGTTACTTTCTCTCTCCCCCTCTGTCTTCTCTCTCTACCAACCTCTGCTGAAAAGTTGGCTGTGCTTAAGGCGGAGGGAAGGGGGTTCTTCCTTCCCTGTGAGTTGCCGAGATTTAGGGTAAATTTGACTTGGGTTTTGATCCCCCTAGATTTTGCAT…
Isoform_11332	CAACGTTTTAGAGAGAAATTTCGAGAGAGAGAGAGAGAGAGAGAGAGATGGTTGGAAGGGACGGTAATGGTATGATGGATGGAATTTGGGGAGGAACTCTGCCTCTCTGAATTAGCAAACCTACTTGCTTTCTCTTCGATCTTCACTAACTAAATTGGAAAAAATAGTAAAAAAAAACATGGGAAAAGAGAGACTCACTGATTAAGGTTCTGGGCTGGGTTTTTTTGTTTTGTCATTTACGCATAGTTAGGTTTTCTGGGTATCAATGCCCTTGTGAAGCAGCAAATGGTTTCATGAAAATGCTAAGCTGGTTAAAGCAGCTGTTTTGGCTTTGGGCAAGTAGAGGGGGTTGATCAGATATAGATCTCCTCGAGGATATAAATTATACATGACCAGAGT…
Isoform_11444	GAAAGATGCTTTTGAAGAACTTAAGAAGCTCGCAGCTGCATCGGTGAATGAGAAACCCAATCAGAAGGTAGAGGAACCTAAGAGGCCTAGTCGTGTTAAGGATGCTGTCAAACATCGAGGTTTTGTTGCCTATGAGCGTGAGGGTGTTTCCTACAGAGATCCTCATATTCGGATGAATGACTGGGATGAGGTTATGGAACAGTCAAAACCTCCCCTGCTGTTGAAGACCCAATCAGCCCGTTGCATGGACTGTGGCACTCCCTTCTGTCATCAGGAGAAGTCTGGTTGTCCTCTTGGGAACAAGATACCTGAATTCAATGAGTTGGTGTATCAAAATAGATGGCGTGAAGCATTAGACCGTCTCCTAGAGACAAATAATTTCCCAGAGTTCACTGGTCG…
Isoform_11489	ATGGCGATTGCTTCTTCTCCGAAATCACTCTCGTTCGTCAGTCCACATTTCCTCATATATCTCGCACTTTCAGGTACAATCCTCTCCAAATCCACACACATTTCGTTCATTTTCTTCAATCATTCACAAACACTCTCATCAGCTTCACTCGTTCCATCCAACTTTTGATTCTGAATTCACAAACAGTAGATACCTTGGAACTCGTAGTTTCTCATCTGAAGTCGCTCTTGAAGACAAGGATCTTGATCACTTGGCTATAATCGATATTTTCTCAAAACCAAGGGCTGTTGATGAGATCAGGAAAAAGTTAGAGTCGAACAATATCATTATTAGTCACGATTATGTGTTAAACGTTTTGCAAAATCTCGAATCGAATCTTGATGTGGCACGAAGGTTCTT…
Isoform_1149	GAGAGAGAGAGAGATGGTTGGAAGGGACGGTAATGGTATGATGGATGGAATTTGGGGAGGAACTCTGCCTCTCTGAATTAGCAAACCTACTTGCTTTCTCTTCGATCTTCACTAACTAAATTGGAAAAAAATAGTAAAAAAAAAAAAAAGAAAAAGTTCATTTCGCATTGTTCTATTTCCTTTAGAAGTTTCTTCTTGTGGAAACTTTAGTCTATTTGTTTGGGCAAATCTCCTTTGGCAATTGGGAGTCTTTTGTTGACTCCTGTTATTTTGTTACGGCAAATCTCCTTTGGCATCAGATCTCCAATTTTTATCGGTCTAGAGACCTTGTTGGAGATACTGACTCGATCTCTGTATCTAACTTTGGTTGATCTGGAAGTTACATTCTAATCACTATCA…
Isoform_1168	TTTTTTTTTTTTTTTTTTTTTTTTTTTGCAAAAAAAAAATTCCGACACATTTTACTTTATTATTATTATGAGAATTAATCCTATTACTTCCGATCCGGGGGTTTCTACGCTTGAAAAAAAAAACCAGGGGCGGATCTCCCAAATCATTGGTCCGGTACTAGACGTCGCCTTTCCCCCCGGCAAGATGCCTAATATTTACAACGCTCTGGTAGTTAAGGGTCAAGATAGTATTGGTCAACCAATTAATGTGACCTGCGAGGTACAGCAATTATTAGGAAATAATCGAGTTAGAGCTGTCGCTATGAGTGCTACAGACGGTCTAATGAGAGGGATGGAAGTGATTGACACGGGAGCTCCTCTAAGTGTTCCAGTCGGTGGAGCGACTCTTGGAAGAATTTT…
Isoform_1169	ACGAATCAATGCGAAGCGAGCGACAGAGACGACGAAATGGGTGCAGGAGCTGAAGTTTACGAATTCTGAGACTCTACTGTATTCTGTCGCGGGGCTTAAATCATCACAAGTGGGCTCCATTCATTTTTCGTGACTGTCTCATTCAGTTTAAAATGGTAGTTACATACTTTCTTTGCCTCTATAATTTTTTTCTCCTTTGTTTATACTACTTATTCTTTGAAACAAATGTTTGAGACTTTGAGTAGGATAAGGGTACAATTTTGTTTATTCGAAGTTGTTTATTTGAATTTCATTCGACTATGAATGCTTTCAAAGATGTTACAGTGATTGGCATGTGCAGAAACCTTGGTAAATTTGATGGTTATGAGGTAATTTTAAGCTATTAAATGCTTTCAACCA…
Isoform_11803	TGGTGGGCTAGAGGTCCACAAAAAGCTGCCATACCGGTTACAAAGAAAATACAAGAAAGTCACATGATACAGTCCCAGGATCTGCATAAATCTGTATAAAAAAATCTTTAAAGTCCTTAATTTGTACAGCTCGTAGAGATGCCCGAAACACAATAGGATCCCATGCTTCAATCCAGGTGCATTTCTTGTTCTTAAAGATATGGTTCATTCAACTGATCCCAGTCCACAAAACTGAGAAAGAAGCAATTCTCCACAGTAAAGAAGCTTTCTCAGAGAAGAAAACTAGACAAACGGGAGGAGATGCAAAAAGTTCAGAAATTGAGCTTGCAAGAGAACCCCTTGGATTAGACACCCTCTGAAGCTAGGAGATGGAGTCTAGAGATGTGCTTAATGGCTGCT…
Isoform_11824	AACTTCAACTAATTCTCTTTAATCTCGTTTCTTCCCTCATTTCAATCACTCACCTCCACGTTCGTCCACCGTCGCCGGAGAGTCGGAGACCACCCCCTCCCTCCCCATGGATCTCCACCAGCGACCAGCCAAGCCCCTTCGTTCCAATTTCTCATCAACCCAACAACCCCTCAAGCCTCACCACCGCAAGATTGATGACAACGAATCTGCAAAAGCCTCAGACGCATTGCCTCTTCCTTTATACCTCACCAATGCCGTCTTCTTGACCCTCTTCTTCTCCGTTGTTTACTTCCTCCTCCAACGCTGGCGCGAGAAGATCCGTACCTCTACTCCTCTCCACGTTGTCACCTTCTCTGAGATCGCTGCCATTGTCGCCTTCGTTGCTTCATTTATCTACCT…
Isoform_11946	TCCACCATTATCCCCATTTTTAAATTCTTCTAAACCATTTTGTCTCTCTCTCTCTCTATTAATCGGCCATTGCTTAAATCAATGTTAAATCCCAATCAATCCTCTCTGCGGAACTATAAGACCCAAATCTATCCTCTGTAGAATATAGGACCCAAAAGAGACTACCAGCATTCAGGCCCTCCAAGAAACCAGAAGATTCCGTTTATACAAAAAAAAAAAAAGGTTAAAAGAAGAAGAAGAACAACCCCTTTTCTTTGCTTTCTTTATCTTCAACGGAAACACCAAGGATTATGCAACGCACATCTCTTTCTCAACCCTAACCCTAAAAGGAAATATCAGTCACATTTCTTTGATCGAAATCCCATTAGCGTTTCTCGAGAAAATAAATAAATAAATAAT…
Isoform_11991	TTTTTTTTTTTTTTCTTTTAAGCGTGAGGCTCTGATACCAAATTGAAGTTTGGTCTTAAAATTGTCTTATCCAATTTGGATTAAGATAGTTTATTTATATAAAGGAACGATTACAAGTAGGACAAAAATACCTATGGAAGACAAGAGTAACAATTCCCTAAAATAAATACAAGTAATAATCAGTGCATTCCAACACTCCCCCTTAAGTTGGAGAGTAGATATCTACGAGGCCAAGCTTGCCAATAGAAGTCTTTAACAAGGAAGGTCCCACTGGTTTAGTCAACATATCTGTAGTCTTATTCTTGGAAGGAACATAGAAGGGAGTGACAACGCCATTACAGATCTTTTCTCAAACAAAATGAACATCAACCTCAATGTGCTTAGTCTGTTCATGGTGAA…
Isoform_12461	AAGCAAAACAAATATCGATGATGTGTTGAGTGCGGTTGTGCGTATTGTTTCGGTTGCAGTCACTATAGTGGTGGTGGCAATTCCAGAAGGTTTGCCATTGGCTGTCACGCTCACTCTTGCATACTCCATGAAGAGAATGATGACTGATCAGGCAATGGTGAGGAAGCTTTCGGCTTGCGAAACGATGGGCTCAGCCACAATTATTTGTACGGATAAAACGGGCACCTTGACGCTTAATCAGATGACAGTGACCAAGTTTTGGCTTGGGCAAGAGGCCATGGGAGGAGAGTCTTCCAAAGTGATTGCTCCAAGAATGCTTGAATTGTTCCACCAGGGAGTTGGTTTGAACACAACTGGTAGCGTTTTCAACCCCGTTTCAGGATCAATACCTGAGATTTC…
Isoform_12675	CTCTCCTCTCCCTCATAACTAATGCCTTTCTTCTCCTCTCCTCTCCCTCATAACTAATGAATCCTCTACTCTCCTTTCCTTAAAAACTCGGTAACAGAGCGTTAGGGGCTTACGAGAACTTTGGCTTTTTTTTTTTTCTCCGATTGAAAGAAGTCTGTACTCATTCGGTCATTCCCTTCTTCCCCGTGTTCGGTGTTTCCTCTCCTCCACTCTCTTTGTTCTTTGCAAAACGAAAACGGAACACTGGAATAGACACTGAGACAAGTGACAACAGAGCAACGACGGACGGCCATTGACGGGAAGAGGCGGCATCACGACGACTCGGCGAGCGAAGCACACAGGGCTCGGCGGCCAAAGGGATCCGAAAGGGAAAGGTTAGGCAATTTCTTGGTTTTTTTT…
Isoform_12691	TGCCTAGAAAGCAACCGGTGTGATTCCAATAGTTTCTATCCCCTTTTCTATTTTTTCTAGCTGTCATTATTTCCAGCAAAATTCCAGAATCTGTCCAAATTATCTCTTAGCCACGTACTTATTTTAAACATTGAAGCTTCCTCCATTTTTGTCTTACATCAGTTTGGTATCAGAGCGAGGGGTAGATATCATGTCCACAGCACGGTCGGGAAGGATTGAAAACCAGCAACCAATTAGTTGAGCAAGCCAATACTCTTAATCTTCGAACGAGCAACCTTGAAAAGTAAGGATCACAAACTGCCAATGGTTCAAAAGACATTGAACAAAATTTCAAGCGACCGGGTGATACAGAAGGAGATGACTAGAAGGCGATGACTGGTATCTATCTTGTAAGAAAAT…
Isoform_12717	ACTCAATCCTTGATTCATCTTCATTACCATTCTCTATACATAATTGGGAACCAGAAGGTGGGTTCCCAATGAGGATTCGTCGTGTTTGTCCCGGAACACTTCTGGGTTTCTGGGTATGTTTAGTACTGCTATTCTCTGTGGGCTTTTGCCATGCAGATGACAAATCAGTTGAGGTAGTTGGTTTTGGAGAATGTGCTGATTGTTCCCAGAGTAAATTTAAGGCTAGCCAAGCTTTTTCAGGACTACGCATAACAATTGATTGCAAGTCTAAAAATGGACACTTTCAAACAAGAGGTACTGGAGAGCTGGATAAACAAGGAAAGTTCAAAGTATCTCTCCCTCAAGAGTTGGTTCAAGAGGGTAAACTAAAAGAGGAATGCTTTGCACAGCTTCACAGTG…
Isoform_1272	AATGAAGTTTCTTTCTACCACCTGATCCTCACTTCGTAATAGGAACAGAGCTTAAAAGTTCAAACCCCTTGTCCAATTTTCCATCTTCTTCAGCTGCAAAAAACTAAACAAACCATGTCAGGTGATAAAGTTTCGCATTATGATTGTGGTACTTTGCTTCTTAACATAAGTACAAGCACCCTCACCATAGCCCAAAAGCGATGGCGAACAGCTTACGCTACGATCTACTCTATCCGGGTCATGATTTCTATTGCCAATGAAATTGTATCCAAGAAGAATAAGGGCATCCCACACTCTCATCCATACACTATCCTTGATATTGATCAACCCAGCACTTCTACACAAGATAATAACGATACCGATACCGTGCCTCGACAAGGTTATTCCGACAATATCAAC…
Isoform_12737	TTTTTTTTGTAGTTTTTTTTTTCTCCTCTTCTCTAAAAGTAGAAAAAATAAGCAGTTTTTTTTTACAAAATTTATTTTCCAAATATCTATTCATATTACAAAAAAAGTATTTTCAAGAACAGTTTTTAACAATTTTAAACAGCATTGATTTTTGCTTATCTACTTTTATGTTTACAAGAAGCAAGGCCTTGTGTACTACATTTATACGGAAATGAAGTCTAATATGCATGAACATTGGTGGTTAAAAGGGGGGCCGGCAAATGATACCAACTCCATGACCTGATTCTCTACCACTATTAGTAGGCATGATGAACAGTACTTTGTGAGCTATTTTTTATGGAGTTATTATACATGTAAAATACTGTTCATGGAGTACTGTTAATGAAAACAATATTAAAT…
Isoform_12778	TATTGGATGCAATTGGAATTGGGAAAGATCTCCGAAGCCAATTCCTTGAAATTCAAGGGTACATTTTCTTTTTCTGTTTCATTACAGCTAGGGGTGTAAACAGTTGAGTGGAGTAATTAGAAACTCGACTCAACTCATTAATTTTATCAAGCCTAAATTTAAAGCCCAACTCAATTCATTATGAATTCGAGTTTGAGTCGAGCTAGGTAATGCTCGAGTCGAGCAAGCAACTCATTTTGCTTCAATAAGAAATTCATAAACCAATAAGGCCCCGTTTGATACGGTGGAATATGAATGGGATTTCGATTCCAACCCCATAATCCATGGAAAGTGATAAAATCAAGAGTTTGTTTTGAGGTTAAGTGATTGGGAAAAAGCGGGGCCCATGGATTATGAATC…
Isoform_13035	GAGAAGAATCTCATCTTTGTTCAGACCTCTGTATTGTAATGGTGGGATCAGAGAAGCGGACATTTTCGGAGATGTGGTGATGGTGATTTTGGTGTGACAAAGAGCGGTGAGGTTGGCGATCCTTGATGCAGTGACGCCTTTTCGCACAGATTCAGTGGGTAATTTTTTTGGCCGGCGAAACGTTTCTGATAAATGAACGGCGAGAGTGAAGTCGCGGCAGCTCCGGCGGCCCCACCGCAGCCGCTTGAGTGGAAATTCTCTCAGGTCTTTGGCGAACGGACGGCCGGTGAAGAAGTTCAGGAAGTCAGGAATAACTCAGAATTCAGCAAGAAATCTGGGAATAACATAGACAAAGTCGACATCATTTCAGCGATTGAGTTTGATAAAACTGGAGACCAT…
Isoform_1308	TCGTATATTATTATATATATTAGTTTGGCCAGTCTTAATATGTGAAATTACTTATTTCCATATTATTGACTGTTTAGTCAATACCACATTTAGAAGTTGATCATCTCTAAATTGTTATTGCCTTGTGTGTTAATGAGGATTATTTTATAATCTTTTGCTCCTGCAAATAGGATTAGTAGGTATTTGTACGACAAATGCCACAGTTGAATTACTATTGGGAAATTCAACTGATTAGGATTTGTTCCAGCTTCTGTCCTCTGGAAATAGCTACAAGATGACTCCTCAGAGTTGATCTTCGTTTTTGTGTATTGTTGGTTGATCTCTCATAGATAACCTCATCAGGTATCTCCGATGATTTAGGTTGTGTTTAAGTACTGAAATGACTTACATAGAGTCTAT…
Isoform_1318	TTTTTTTTTTTTTTTTTTTTTTTTTTTTTCTGCATGAATGTATAAATATTATTATTGATTCATGTAAACGAACCATTAATAAGCTCTTCTTTTCAGAGTCACCATATAACCACACCAAATTAATCACACACGTTCATTTCAATAATAAATTAAAATAATTAACTTGCTCTCTTGTTCAGTAGTCCTAGATCCTCTCTCTGCACTGAAGGATTTATTAAAAGCAACACAATCCATGCCAATACCTTCACTGCAGAAAACGACATATTCTTCTTACACGCACGAGAGAAGAATGCTATGGAAGCCTAAGGATGAGAAGGGAAAAGAGGTGCTAGAGGTGGAAATTTGCCAAACTTGGGGTGGTGGAAGTACTTTTTAGGAATCTTGGGAATAGGAGGTAGG…
Isoform_13266	TTTTTTTTTTTTTTTTTTTTTTTTTTTTCATTGTTTAATTTTTTTTTAGTGCTTGGCATCTATCAGTTTCATGATCGTGGTCCTGGTGGTACTTACAGTACTTGCTCTTTGTCCTTTTAATCGTATATGTTATCATTAGTTTTGGCTACTCGAAGAATGACTCTTTCTTCAACTGCGTCAGGACAGCTTCGAGAGGTTGGGCAAAGATTAACAAGACAATTCTACGTTCGGGATGGTCATCCCTTCTCTCCGGTCTTCTCAAGTACTTGTTTGGGGATCCCCTAGACCTCTTTCTCAGGGGAGATGAGGGTGACCTCTTCCTCTGCCTCTTTTCTTCGTTTCTTTACTTCTCATCCTCCATGTGCCTTCTTTCATCGTGGTCCGGGAATGTTTCTCGAG…
Isoform_13365	GAGAGTCGGTCTAGGAAAGCGAGAATTTGGGCGAGAAATGAGAGAGAGAAAATTTATTCAGAGTGCTTAGATTTGCATGCGTTTGAATTTGAAAAAAAAAACTAAATATACAACTATATTTATGGATTGTTTCTTGTGATCTGTCTCTCAGACAACAACAACTGGGTTGGAAAAAATCCGAAGCCCATCAGTTACTTTCTCTCTCCCCCTCTGTCTTCTCTCTCTACCAACCTCTGCTGAAAAGTTGGCTGTGCTTAAGGCGGAGGGAAGGGGGTTCTTCCTTCCCTGTGAGTTGCCGAGATTTAGGGTAAATTTGACTTGGGTTTTGATCCCCCTAGATTTTGCATTGGTGTGTTCCTGAATCCTCAAAACACTCAGATTTTAATTTCAAATTATGGA…
Isoform_1370	AAGTCATTAAACCATCTGTACTTTCTCTCCCTCATCTTTATCTTATAATGAATTCAGAACTTATAATGAATTCAGAAATTTAGAGGGAGAGAGAGAGAGAGATGCCTCTGGTAAGGTGTACGGTGAGGAATGAGTACAGCTTGGGATTGCCGGAGCTGTACAAAGAGGCGAACAGAGAAGATCCCAAGGCTATACTTGATGGCGTAGCTGTTGCTGGTCTTGTTGGGATATTGCGGCAATTAGGCGATCTCGCTGAATTTGCAGCAGAGGTTTTCCATGGTTTACAGGAGCAAGTGACGACTACTGCTTCTAGAAGCCATAAATTAGCAGTTCGTGTACAATGCATAGAAGCTGCACTTCCTCCGCTTGAGAAGGCTGTACTGTCTCAGACAAGCCACT…
Isoform_1374	TTTTTTTTTTTTTTTGAGCAATCCTTTCATAAATAGTCCCCATAGAAGGAAGAAAATTTCGGTTTTTAGTGAAATTTTGAAAATTTTGGCGAATAAACAATGTTCCCTTCTTTATCAAAAAGTTTTTTAGTTTAAATTTTTTAGGTTTATAAATAAGAGTGCAACCTTTTTTTTTTTTGAAAATAAACAAACATTTTATTAACAAGGTGGGCAAAAAATCCACCAGAAAAAGTTACAACACAGGTTTAAGTCACCTACCAACAAGTTACAACAAAAACAAAAATCACAACAAAAAATCAACTAAAGGAAGACCAACTTCTACACAAATTAGAAACTGAAAGATCTTTGAACTCTGGCACAATCTTAGCCCACTGGGAAGCACAATAAACCGCAATGTCC…
Isoform_13888	GGGCCCAGCTAACGCGTGAAACACTCCGCCTGGGGAGTACGGTCGCAAGACCGAAACTCAAAGGAATTGACGGGGGCCTGCACAAGCGGTGGAGCATGTGGTTTAATTCGATACTACGCGCAAAACCTTACCAGCCCTTGACATATGAACAACAAAACCTGTCCTTAATGGGATGGTACTGACTTTCATACAGGTGCTGCATGGCTGTCGTCAGCTCGTGTCGTGAGATGTTTGGTCAAGTCCTATAACGAGCGAAACCCTCGTTTTGTGTTGCTGAGACATGCGCCTAAGGAGAAAGTCTTTGCAACCGAAGTGAGCCGAGGAGCCGAGTGACGTGCCAGCGCTACTAATTGAGTGCCAGCACGTAGCTGTGCTGTCAGTAAGAAGGGAGCCGGCGCC…
Isoform_13928	ACTTTACTCTCTCTTCTTACTTTTTCATTCATTCACACCTCCATTAATCATTCTCGTCTACTTCACTAAATAGCTAAAAGTCCATTAAGCTCGAAATCCCATTCCTTGTTCAGATACACAAGCCGACGAATCAAAACCGTCTCAAGATAAGATCATAGTGCGCAGACCTGACATTTGCAGATTCATTATGATTTGATTTGAGCCTCTTATATGTACCACAACTTCTTTGATTTTGAATAAAGGAATCAGAACCAGAGTACATTTTTACTGTTCCCTGCTCAGCTTTTATGGGATCTTTTTCTTTTCTTGCGATAACCCAAAAGGATCTCTCTTCATCAAGGATCTGTCGACATTGAAGCTTCTTTTTACTGTAAGTTAAAGAATTCGTACTTATTTCCT…
Isoform_1397	GTTGTAACACAATGGTATTTTCATCTAACATGAACTCATAAGTATTGTCTCTTTCATGATATGTGTTGTCCAATCATAAATTCATGGCTTCTCCAAACAATATATGAAAAGCATCCATCTCAGTAACATTACACTCAATGATAGCATAGTAGTGTTTGCCAATGGAAAGAGGTACCTTGCATGTGTGTGTGACCATCGTCTCTGATTCTCTTTTAATTCATCCCAGTTTTGTATGGGTGCTGATGATTTTCTAGATGATTTTCTACTGTTAAATTGAGCTCTTTAACCACAGCTTTGGATGCATAATTTTCAGTGCTCCCATTGTCAATAATCAAATCACAAATCTTCTTGTTTGTAACACACAAGGATATGAAGATTTTGTTTTTTGACTATCTGCCC…
Isoform_14119	ATTCGGAGCCCGGGCCCGAATCGTCCACAAGCCATAACCCCGGGCCCGAATCGTCCACAAGCCATAACCCCGGGCATGGAATAATCGAGCGCCCGAGCCCGCCGCCGCCGGAGATTCCGCGGCTAGACCACCAGCCCTTAATCGGCGATCTAGAGCGTTTCGCCGAGCTGCAGCAGCGCTTTAATTTATATTATCCGGTTACGACCCGGATAACGGACTTGGCGGAATTCACCGGCCGATTGCAATTAGCCGTTCCAATCGAAGCACATATAGAATCAGCTTTGGTCTTCGATGGCTATGATCCCGATCGAATCCGGGGCCGGATAAACGAAATCCGGGGGATCCTCTTTACACATCCCACTAGGGCGCTCCTTCTATCGGAGCCAACCCTTTTACGCT…
Isoform_1421	AGATCTCTCCCCCCGCTCTTGCACTCTCTTCTCTATCTTATTGAATTCCAATGGCTAATACTCAGGAGGAATCGAACCCCCTTCTCACGAAGAAAGATGGAGACGGAGCTGATGAGAAGAAAACCAAGCTTGCTCCCACCGCCTCGCCGATTGCATTTCCAGCTGGGAAATCTATGGAACCGGAATCCGGTGATGGGTTTGGCTGGACAGCTGACGGATTGCCGTTAGTCAACGGAAGCGTAATGGGTGAGCCGATGGGTCGAAATCAGTGGGATTCGAGCCTCTTCGCTTGTCTTGGGCGTAACGATGAGTTCTGTAGCAGCGATCTTGAAGTTTGTAAGTTATCTATACTGAATTCTTTGACAAATTGGAGTTCTGGGCTTTTCGTGTTTAATTGTT…
Isoform_1437	GGACTCGAATTATTTGGTCATCTTCATAAATCGAGCCGAGTCCGCCATTGTCGGTTCAGAGTTCTAAGAACTTGAACTACCTGTTTTCTTGATTTTTAGATTATTCAATCAAAATCAAAAGATGACTGTGAATCGAATAAACCAATCGCAAGATCGAATCTCTGGTTCTGATCTTTTGAAATCGAAGGATTGTCCGTCGTCGGGGAACCTCGCCGGAGGAAAGAAGATGAGCGACGATGGGGGAATGTGTCAAAAGTGGAAGGTGTTTACGGAGGTTGAAACGGATCAAGAGAGTGGAGGTTCGTCGGAGGAGTTTGAGTCACCGAAGTCGGTGACCAAGGTTGGGCGACGGAGAAAGAGTGTTCACAGTCAGGTCTTGAGAATCAGGGAGGAGGATTC…
Isoform_14404	AAGCTCACCTCTCATACTGATCAATTCACTCAACCCTTGATTCATCTTCATTACCATTCTCTATACATAATTGGGAACCAGAAGGTGGGTTCCCAATGAGGATTCGTCCTGTTTGTCCCGGAACACTTCTGGGTTTCTGGGTATGTTTAGTTCTGCTATTCTCTGTGGGCTTTTGCCATGCAGATGACAAATCAGTTGAGGTAGTTGGTTTTGGAGAATGTGCTGATTGTTCCCAGAGTAAATTTAAGGCTAGCCAAGCTTTTTCAGGACTACGCATAACAATTGATTGCAAGTCCAAAAATGGACACTTTCAAACAAGAGGTACTGGAGAGCTGGATAAACAAGGAAAGTTCAAAGTATCTCTCCCTCAAGAGTTGGTTCAAGAGGGTAAACTAAAAG…
Isoform_14435	GGGTATTTATCATTAACCCGGTAAGGGAACCGAGTTCATATACGGTATACCCACAAACGTAACAGTTAAAAGCTAGGTTGCTTCTTTCACTCTCTGTATCGCAAAAACCCTACCCATCCTCGTTTTTGTGAAACAGCCATGGTGGCCGCTTTCGAGCTAGAAGTTCACTTCAATCCAGATGGATGGGGACCGATTTCTACTCTTCCAAACCACCCTACGAACGTCCCCTTTGCACCCTTCTCCCGTTCTGACAAAGTCGGCCGCATAGCCGATTGGAATCGCAACTACAATCAGAACTCCCGTAACAAAAATCCCGCTGATTCGGCCTTTGACTTCACAGGTGACGACTCTTTCGGTGGCGGCGCTGGCGACGAAGATCAAACTTTTCGCCTTGTCGAC…
Isoform_14441	GATTGAAGAGAGAGTATTATGCCCATGATTGAAATCTAGGGTTTCAAATCACCATCCAGACTCGGGTTTTATCTCTCTCGCCCTCTCTTTGTCAAATAGGGTCTTGATTCGTCAACTGCTAGGTAGAACACCAACAGTTACAAGTGGCCAGAATCTCCATTAAATCTAAAATTCAGTCATCACCGATAGGATTTGGAAGCCACACTCAGAATTGGGTTACTAGTTGAACACCCATCGACGCGATGAAGAAACTAAACTTAGTTTTGGATCTCGATCACACATTGGTCCATTCGTGCCAATTTGATGAAGATTTGTATTCGTTGGATTCTGGGCAACAAGGGCTAGGCAGCTGATACATCCATCAAACGGCAGTTGATACAGCTATAGACGGCGAGTTCC…
Isoform_1454	ATTCTTCTCTTCGCACGTTCATTATTTCCGATTCAAAAAAGCCAATCAACTTGAACTTCTTTATATTCATGTTTCATTGTGTTGAATCTGCTAGCCTAGACTTGCAACACCTCTGACTTTGATAATCAAATTATTTTTTATTTCATATATATTATGGGTTCAATTGAGTTTTTAAATTCATGTTTCATTGGGTTCAATCGAATTCATGTTGCATTGCACCAACTTGAAGTTTTCAGCGTTCTTGTTTCATTCTGTTATGCAAAAAGAATTTATATCTGACTTTAATACTTAAATCAAGTTGGTTTTCTCCCACTCATAGATAGAATCAAGTTAGTTTTCCGTTCAATGGTAGAAATCATTGATTATAAGTGTGTTTGAATACGTTGATTTGATCTTAAA…
Isoform_14585	CCAAAGTGATTGCTCCAAGAATGCTTGAATTGTTCCACCAGGGAGTTGGTTTGAACACAACTGGTAGCGTTTTCAACCCCGTTTCAGGATCAATACCTGAGATTTCAGGTAGTCCAACTGAAAAAGCAATTCTTTCTTGGGCTGTCATGGAACTGGGTCTGGATATTGAGAAATTGAAGGAAAGATGTACCATTCTGCACGTTGAAACCTTCAATTCAGAGAAAAAACGAAGTGGAGTTTCAACGAGGAAGAAGGCTGACAACACTACTCATGTGCACTGGAAAGGAGCAGCTGAGATGGTAGTAGCTATGTGTTCGAATTATTATGAGAGTGATGGAACTGTAAAGTCGATGGATGGCGAAGGAAGGAAAAAATTTGAAGCAATAATCCAAGCAATGG…
Isoform_14757	GTTATATATTTTTAAAGCTTGTGTAAACCACTTACCTACGTGTTGGAATTCTAGTTGGTTATAACTGTTAATATTTTAGTGAATTGGGTATTAGTTATAAATAATTATTTGGAATTATTTATAAAAAATGTTACATGTCAAGTTTGCATTAAGTGGGTTATTTGGGTTGAGTTGGGTTAACACGATTTTCCTTGGGCTGGGTTAGGTTACAAAAAAAATGACATGACATTGGGTTGGGTATTGTCCTCAAAATTTTGGGTTGGGTTGGGTTCATAGCTACACGACCCCAATAACCCGATTTGCCACCCCTAATTTGTGGTAGTAAAATATATCTGCATTGTGGAAAGAAGTAGGAGGATCTTTGAAGATGAGGGTTATCTGAGGATGAGGGATATCATT…
Isoform_14794	agattaGCTTAAATCAATGTTAAATCCCAATCAATCCTCTCTGCGGAACTATAAGACCCAAATCTATCCTCTGTAGAATATAGGACCCAAAAGAGACTACCAGCATTCAGGCCCTCCAAGAAACCAGAAGATTCCGTTTATACAAAAAAAAAAAAGGTTAAAAGAAGAAGAAGAACAACCCCTTTTCTTTGCTTTCTTTATCTTCAACGGAAACACCAAGGATTATGCAACGCACATCTCTTTCTCAACCCTAACCCTAAAAGGAAATATCAGTCACATTTCTTTGATCGAAATCCCATTAGCGTTTCTCGAGAAAATAAATAAATAAATAATAATGGCACAGCTGAAGCAGAGCTCCCACCTTGACAACATCCCATCGACGCCTGGAAAATTCAAGAT…
Isoform_14797	TTTTTTTTTTTTTTTTTTTTTTTTTAGGAAGATTTTTTTTTAAAGCCAGCTGTTGTATTATTATTCAAAAAAAAAAAGAGGGAAATTTACACACCTGCTTTGATCTAAATAAGATAGATCTAATAACATATATTAGGCTAACAATTTGGTTTTGTGGACTGATTATAAGTTCTATTGGGCAAACAATTTGGTTTTGTGGAATTATGTACCATGTTTTTTATCATGAAAATCAATATTCCAACATAAATATGATAATGATAGTAACACTCTTTAACAACATGATATTATTCCAAGCATAGTTGATAACCGTGCGACTAAAATCATCCAAAATATGTATATATATTATTCATTTATTTTAATAATACATACAACATAATATGATTAGTGAACAAGTACGTT…
Isoform_14903	AGCATTCGACCGGATATACTGTCACCTGCCGCAATGACCGAGTTGCAAAAGCTTTGTGATAAGGTCCCTTCATATCCAGATGATGTAGCTATGGCTCTTATTGAGGAGGAACTTGGTCAGCCATGGCAGGATATCTATTCTGAACTTTCTTCATCCCCAATTGCTGCTGCATCTCTTGGACAGGTATATAAGGGTCGGTTAAAAGAAAATGGAGATTTGGTGGCTGTTAAAGTGCAGAGGCCTTTTGTTCTCGAGACAGTAACAGTTGATTTGTTCGTCATACGGAATTTAGGACTGGTCCTCAGGAAATTTCCTCAGGTCTCCATCGATGTGGTTGGATTGGTTGACGAGTGGGCTGCTCGTTTTTTTGAGGAGTTAGATTATGTTAATGAGGGTGAG…
Isoform_14960	TACTGGGAAACTGGAAATCTCAAGGCACCACAAGTGGCATGTCTGTGCTTGATGATCATGAGGTAATGTTTCCAATGGTACAAGTGGGAACACATCTCTCTAGGTGGATCACTGTCAAGAACCCCAGCCACAAACCGGTTGTAATGCAGCTCATTCTCAACTCTGGGGAAATTATCGACGAATGCAGGGGCGGCGATGTGTTTTTACAGCCCCCTTCATCCAATAGTTTTGTTTCTGATGAATCTACTATCCCACCAAGGCATGGTTTTTCGATAGCTGAAGGTGCACTGACAGAAGCCTTTGTCCATCCTTATGGTAGAGCATCATTTGGTCCAATATTCTTTCATCCTTCGAATCGATGTGGCTGGAGAAGTTCGGCACTGATAAGAAACAATCTTT…
Isoform_15062	AGAGAAACCATATCGAGAAGGAGGTCGACGTTCACGGACATGGTAGCGGGTAGTATGATCAGAAGTGACAGGAGAGGAGTGGACAGTACCTGAGGAGGATTCTGGCATAATAGGCTGTGCATCCTGAGCGCGAGGGCGACGAGCATAAATCTCTCAAAGAAGTAAGAGGAAGGAGCTAGATTCGGCCACTGGAAGATCAAGAACAGGAACAGGAAGTGCTGGTGGTGAATTAGACACAAGAGGTGTCACAGAACCTGTACAGGGTTAGTACCAAAATAAGGAGTATCCTCAAAGAAAGTAACATCCATGGAGTAATAAGGTATGACGAGTAACTGGATCATAACACCTATATCCTTTGGATACAGATGAATAACCAAGAAAAATGCAACGAATTGCCTT…
Isoform_15063	CAACCTCTTCACCTCACAAAAATTCCAATTCTGCAAATTCAGATATTAATTCCCAAAGTCATCTCACTAATGATTCCATATCTGAATCCTCGCCGTCCAATCTCCCTAACTCTTCACCATCTCGTGTGTCATCAGCGGTTCAACCTCCTGACTCCTCTGATTCTACATCATCTTCAAATTCTCCATTAACATCTCACAGTCCTCGCTCCATACCCGCACCGACTCCATCATTACCCATACATTCAATGGTTACTCGTGGAAAGGCAGGTATATCACGTCCAAATCCAAAGTATGCCATGCATATTACCTATAACCCTGCTTTGTGTGAGCCAACGTGTTATAGTCAGGCTGTCAAACATATTGAGTGGCGGGAAGCTATGGGTAACAAGTTTAATGCTT…
Isoform_15133	ACTCACACTCTCATCCTCTGGTTGCAGGTATCTAATTCTAATAGAGGGAAATGGGTTCTTCAAACCAACCTTCATTAATGGCTACTCTGCTCCTCAGTTTTTCCATCTTACCATTCCTGCCGGAGTTCGTAGCAGGTGCAACGAGGCACTACACGTTCAATATTAACTTAGTAAACGTGACGAGATTATGCCACACGAGGAGTCTTCTAAGTGTTAACGGACGGTTCCCAGGGCCTCGGCTTGTGGCGAGGGAAGGTGATCAAGTCATGGTTAAGGTGGTCAATCATGTTCCAAACAATGTTACTATTCATTGGCACGGTATTCGTCAACTAAGAAGTGGTTGGGCTGATGGACCGGTTTATGTGACACAATGTCCTATACAGACTGGCCAGACGTACA…
Isoform_15163	AGCAACCATTTCTTTAGATTCTTCTTCTTCTGCTCGACTGTATGCATCATTTCTCTCTCTCTATTCTGTCCTCTTTCTCTCTGTCCTCTTTCTCTCTCTATTTCCTCTGTCCTCTTTACTCTACAACGTGTACAAAGACTGTGTTGCCCCATGTACAATGCTTTCATCAAACTTTGTGTCATGACCTCTAAGTGCCATTTTCACATTCTTGGTTGCATTCGCTCTCTGGGTTGCAGCATTTGTGCCCTGAAGAATTAGGGTTTCATTTTTCATCTTTTGAGTATCTAATTGCGGCTTATGACGAGGGTAAGTCCTGAATTTGAAGATAAGATGCAGGTGGAGGTAGTTATGCCGGTTTCAGCTGACGTGAGCTTTGCATCTAACCATTTTCCAAAGTAC…
Isoform_15286	ATCGCAAAAACCCTACCCATCCTCGTTTTTGTGAAACAGCCATGGTGGCCGCTTTCGAGCTAGAAGTTCACTTCAATCCAGATGGATGGGGACCGATTTCTACTCTTCCAAACCACCCTACGAACGTCCCCTTTGCACCCTTCTCCCGTTCTGACAAAGTCGGCCGCATAGCCGATTGGAATCGCAACTACAATCAGAACTCCCGTAACAAAAATCCCGCTGATTCGGCCTTTGACTTCACAGGTGACGACTCTTTCGGTGGCGGCGCTGGCGACGAAGATCAAACTTTTCGCCTTGTCGACGGCAAGCCTCCTCCTCGTCCTAAATTCGGTCCCAAGTGGCGATTCCAGCAACAGAAACAACTTCCACAGCGACGTGACGAAGAGGTTGAAGCCCGAA…
Isoform_15304	TATTTGAAGAATCAAATCAAATACCATGGTCTAATAATAATGAACCTTTCTGATTAGTTGATAATATTAGTTAAGAACTTTGTTAAAGATAGCTGTGAAAGGTTTCATTAAGGACTAATTTGTGTCGAGTAGACTTTGTTTTGTTGTTGTGAGAATTCTTAAATTCAAAAAATAATTGTAAGGGAGGTACTTATGTCACCACAAACAGAGACTAAAGCAAGTGTTGGATTCAAGGCCGGTGTTAAAGATTACAAATTGACTTATTATACTCCTGACTATAAAACCAAGGATACTGATATCTTGGCAGCATTCCGAGTAACTCCTCAACCCGGAGTTCCACCGGAGGAAGCGGGGGCCGCGGTAGCTGCCGAATCTTCTACGGGTACTTGGACAACTGTG…
Isoform_15457	AACTAAACTCTTAAAGTCCTTCTTTTCACTCTCTTAGCATGGCGATGGACAAAATAGAAGAGAAAGGTTCTGCAGATGGAAGAGATGATTACACTCAAGATGGGACTCTGGATCTTAAGGGCAGACCTGTCCTAAGATCAAAGACTGGGAGATGGAGGGCTTGTTCCTTCATTGTAGGGTATGAAGTGTTTGAGAGGATGGCATATTATGGAATAGCGTCAAACCTTGTGGTTTATTTGACAACGAAGCTCCGTGAAGGGACTGTAACATCTGCAAACAATGTCACCAACTGGGCAGGTACTGTATGGATGACACCCATTTTAGGGGCTTACATTGCTGATGCTCACCTCGGCCGATACAAGACTTTTGTCATCGCATCGATCATTTATCTCGCGGGAA…
Isoform_15495	ACTCAACCCTTGATTCATCTTCATTACCATTCTCTATACATAATTGGGAACCAGAAGGTGGGTTCCCAATGAGGATTCGTCCTGTTTGTCCCGGAACACTTCTGGGTTTCTGGGTATGTTTAGTACTGCTATTCTCTGTGAGCTTTTGCCATGCAGATGACAAATCAGTTGAGGTAGTTGGTTTTGGAGAATGTGCTGATTGTTCCCAGAGTAAATTTAAGGCTAGCCAAGCTTTTTCAGGACTACGCATAACAATTGATTGCAAGTCTAAAATGGACACTTTCAAACAAGAGGTACTGGAGAGCTGGATAAACAAGGAAAGTTCAAAGTATCTCTCCCTCAAGAGTTGGTTCAAGAGGGTAAACTAAAAGAGGAATGCTTTGCACAGCTTCACAGTGC…
Isoform_15675	AAGTACAAATATCCTTGAAACAAAGAAAGAAAGGATTAAAAAAAACCAGAGGAGGAATGGAGTTCTCTTCTTTGGTACGACTACTGGCTCTTGTTGCATGCCTTTTTCCTGCTCTCGTTGAATGCAGAATTCGCCACTACAAGTTTAATGTGGTGACGAGGAATAGCACCAAGCTATGTTCAAGCAAGCCCATTGTCACCGTGAACGGGCAGTTCCCGGGACCGACTCTCTACGCTAGGGAAGACGATACGGTGCTTGTTAAGGTCGTCAACCATGTCAAATACAATATCTCCATCCATTGGCATGGTATCAGGCAACTTCGAACCGGCTGGGCTGATGGACCAGCATACATTACACAATGCCCTATCCAGCCTGGGCAAAGCTATATATACAACTTTA…
Isoform_15758	ACTCAATCCTTGATTCATCTTCATTACCATTCTCTATACATAATTGGGAACCAGAAGGTGGGTTCCCAATGAGGATTCGTCGTGTTTGTCCCGGAACACTTCTGGGTTTCTGGGTATGTTTAGTACTGCTATTCTCTGTGGGCTTTTGCCATGCAGATGACAAATCAGTTGAGGTAGTTGGTTTTGGAGAATGTGCTGATTGTTCCCAGAGTAAATTTAAGGCTAGCCAAGCTTTTTCAGGACTACGCATAACAATTGATTGCAAGTCTAAAAATGGACACTTTCAAACAAGAGGTACTGGAGAGCTGGATAAACAAGGAAAGTTCAAAGTATCTCTCCCTCAAGAGTTGGTTCAAGAGGGTAAACTAAAAGAGGAATGCTTTGCACAGCTTCACAGTG…
Isoform_15836	AACTAAACTCTTAAGTCCTTCTTTTCACTCTCTTAGCATGGCGATGGACAAAATAGAAGAGAAAGGTTCTGCAGATGGAAGAGATGATTACACTCAAGATGGGACTCTGGATCTTAAGGGCAGACCTGTCCTAAGATCAAAGACTGGGAGATGGAGGGCTTGTTCCTTCATTGTAGGGTATGAAGTGTTTGAGAGGATGGCATATTATGGAATAGCGTCAAACCTTGTGGTTTATTTGACAACGAAGCTCCGTGAAGGGACTGTAACATCTGCAAACAATGTCACCAACTGGGCAGGTACTGTATGGATGACACCCATTTTAGGGGCTTACATTGCTGATGCTCACCTCGGCCGATACAAGACTTTTGTCATCGCATCGATCATTTATCTCGCGGGAAT…
Isoform_15838	TTTTTTTTTTTTTTTTTTTTTTTTTTTTCGGATAATAAATGATGTGGTTATATCCACATCATGTGAGGCCGTGGCCTCAGTGAGGCTATGAATCATTACCCATATTATTTATAACCAATACTCAGTTTTTCCTCACATTTAACTGGAGTTGGAAGTCTCTATCTTACGTGCTACAATAGAACATCGCAATTCGCAACCAAGCAAAACTACAAGTTTCTTCTTGATATCACTAATCAACTAGGATCCTAAAATTGAATATATACAACAGCAACACCAGATACAAAAAAGTGGCGTTTTTATCCTGGCCGTTAATGAAGAGGGCAAAAAAAAAAAGGTCATTTTAAACATTTACCATTTTACCAAAATGTACTTTGGGATTAGCCTATTGTTCACTTAGCT…
Isoform_1584	ggttttGATCATTTGCAAGAATTGGTGAATATGGCAAAAACTTCAGATTTTCTTTTTAAAAGAATAAAGCCAAGTGCCAGCGAGTGTGATCATCAATAAATGTGACATAGTATCTGTGACCAGACAGAGCAACAGTGGGAGAAGGACCCCAAACATCAGAATGAATAAGATCAAATGGGCAGGTGCACGATGCATGCGAGAAATATAACTAGTTCTAACATGCTTAGACAATTCACAAACAACGCATTTAAATTTATGAAATTTGCAAGCTTTTATTAAATCTGGAAACAGTAAACACAAATATTGAAAGTTAACATGTCCAACACGAGCATGCCACAATTCAAGATTATTCAATGAAAAAACATAAGAACCCGAAGCGGGCAACACAGAAGCTTGCAA…
Isoform_15925	gttgGGTAGAGGAGAGGGGAGGCAGACAGGTCAGTGTGTGAAGGCTTTTCCTTTTTTTCTTTTAAAAAAGCAACCATTTCTTTAGATTCTTCTTCTTCTGCTCGACTGTATGCATCATTTCTCTCTCTCTATTCTGTCCTCTTTCTCTCTGTCCTCTTTCTCTCTCTATTTCCTCTGTCCTCTTTACTCTACAACGTGTACAAAGACTGTGTTGCCCCATGTACAATGCTTTCATCAAACTTTGTGTCATGACCTCTAAGTGCCATTTTCACATTCTTGGTTGCATTCGCTCTCTGGGTTGCAGCATTTGTGCCCTGAAGAATTAGGGTTTCATTTTTCATCTTTTGAGTATCTAATTGCGGCTTATGACGAGGGTAAGTCCTGAATTTGAAGATAAGA…
Isoform_16059	ACTCCATTGCAGTTTCAGTGGGAGGGCTCGCTCTGTTCTTGATTTTTGCTTCCTGGCTTTTACTATCACACCCAATTGGTTCAACAGTTGGTGGGTATTTTAACACTGTAGATGAATCCACTATATTGAATTTGTGCAATCAAAGCACAATTCAACCACTTTGTGATGAGCACAGTGACGTGGTTGATAAGATTCCGTCTCCGGAGACTTATTTACATGTGCCCGTGAGTTCATCTGGACTTTCAGTAGTTTCAGAAAGTAATGGTAAGATGGGTGAACTGGTGCCTTCTCCGGCAGTGTCAACTGGTTCGACTCACCAAGAAGAGGAGGCTGCTACATCTTCTAATTTCGCCAATGTTACAAACGTTGATGAAAACAGAAACTGGATTTCGTCCAATA…
Isoform_16106	GAAGCTTTCGGCTTGCGAAACGATGGGCTCAGCCACAATTATTTGTACGGATAAAACGGGCACCTTGACGCTTAATCAGATGACAGTGACCAAGTTTTGGCTTGGGCAAGAGGCCATGGGAGGAGAGTCTTCCAAAGTGATTGCTCCAAGAATGCTTGAATTGTTCCACCAGGGAGTTGGTTTGAACACAACTGGTAGCGTTTTCAACCCCGTTTCAGGATCAATACCTGAGATTTCAGGTAGTCCAACTGAAAAAGCAATTCTTTCTTGGGCTGTCATGGAACTGGGTCTGGATATTGAGAAATTGAAGGAAAGATGTACCATTCTGCACGTTGAAACCTTCAATTCAGAGAAAAAACGAAGTGGAGTTTCAACGAGGAAGAAGGCTGACAACACTAC…
Isoform_16111	ATAACCCGCCCTCTTTAATCTTCTCTCCTATTATTCACACGCTCCTACCCTTCCTCCCCTGCATCTCTCTCATAATAACCAAAACAAACCCAATCACACCATCACCATGATCTCTGTCGAAACCCAGAAACCAGATGTAGTTCTTCCTCAAACCACCACCCAAATCCCCCCCACCTCTTCTAATCATGTCTTCAAATCCAAATTACCAGACATACCCATCTCAAATCACCTCCCTCTCCACACTTACTGCTTTGAGAAACTCTCTGAATTCCCAAACAGAACTTGTCTCATCTCAGGCAGCTCCAGTGGCAGAACTTACTCTTTTGCAGAAACCCATCTTGTTTGTAAGAAGACGGCGGCCGGATTGTCCAACTTGGGCATCAAAAAAGGGGATGTGAT…
Isoform_1612	GAAACTTTAGTCTATTTGTTTGGGCAAATCTCCTTTGGCAATTGGGAGTCTTTTGTTGACTCCTGTTATTTTGTTACGGCAAATCTCCTTTGGCATCAGATCTCCAATTTTTATCGGTCTAGAGACCTTGTTGGAGATACTGACTCGATCTCTGTATCTAACTTTGGTTGATCTGGAAGTTACATTCTAATCACTATCATTTCATCCTTTGCTATTGACCAGAAGTTAAAGATACTTATTGAAGTCCACATCAGAACAAAACTCACACTGCTATTTTATGTTCAGATTTCTTCAAGAAGGGGCAGATTTGAAGGTGTATATGCTCTCTCTTATTCTCACAATTTCCAATTAAAGGTCTTGTTCACTGTTATTTGACAATCATTAGTTGGGGTTTCTAAG…
Isoform_1617	GAGCTTGACGGAGACTGGAGATTACTTTCAAGAAAATTATCGAGGAAACACCTTTTTTGGGTATTGAGCTTAACAGGATTGTCCATTGAAGAGATTTACTGGGTCAAAGATGAAAGTGGACGATGACAACATGGAACCGGTGACCAATTTAGGACTCGCACTTGATTATTCTAATCAATGCAATCAAAGAAGATTGAACAATGGTTCAGGTGCAGGTGCAAATGCAGGTTCAAGGGTAGATATGACATTTGTGGCCGGCGACCCCTTGTCAGAATTAGTTTGGTCTCCGCGTAAAGGTTTAAGTGTCAAATGTGCTGAGTGCGGCTTAGCTCAGGAAATACCCTCTCTTTTGGGGGGTGCAGGACTGACCAGTGTGACTCTTCAACCATCCCAAGGCAT…
Isoform_1637	AGAAGCCAAAGGAAAAAGTATTGAGTCATCAAAAGCTCAGGGTTGTGTAGCAAATACCTCAGATGATGGTGAAATTTTATACAGTGAGGCAACAACAGTTATTGAAGGCAGAAGAAGATTTGCTGATGTCTGGCTTATGGACTCAGGAGCTACATGGCATATGACCCCACAGAGAAATTGGTTTCATCAATATAAACCTGTCTCAGGAGGATCTGTGTTCATGGGAGACGATCATGCCTTGGAGATTGCCGGTATTGGTACCATCAAAGTGAAGATGTATGATGGTATAGTTCGCACCATTGAGGAGGTACGACACGTAAAAGGCTTGAAGAAAAAATCTATTGTCTTTGGGACAATTAGATAGCAATGGGTACAAATATTATGGTCAGGATGGGATCA…
Isoform_16468	GCTCTTATTGAGGAGGAACTTGGTCAGCCATGGCAGGATATCTATTCTGAACTTTCTTCATCCCCAATTGCTGCTGCATCTCTTGGACAGGTATATAAGGGTCGGTTAAAAGAAAATGGAGATTTGGTGGCTGTTAAAGTGCAGAGGCCTTTTGTTCTCGAGACAGTAACAGTTGATTTGTTCGTCATACGGAATTTAGGACTGGTCCTCAGGAAATTTCCTCAGGTCTCCATCGATGTGGTTGGATTGGTTGACGAGTGGGCTGCTCGTTTTTTTGAGGAGTTAGATTATGTTAATGAGGGTGAGAATGGGACACTATTTGCTGAAATGATGAGGAAAGACCTTCCACAGGTTGTTGTACCAAAGACCTATCAGAAATATACTTCAAGAAAGGTTCTT…
Isoform_16514	ATAAGATGGAATTTGGCAATGCAAGGGCAGGGTCTTCAGGCAGTGGTATGCAGTCCCCATCGCATATCAAGGCATCAGTGACAGCAGAAGCAGATGAATTGGTACTGGGAAACTGGAAATCTCAAGGCACCACAAGTGGCATGTCTGTGCTTGATGATCATGAGGTAATGTTTCCAATGGTACAAGTGGGAACACATCTCTCTAGGTGGATCACTGTCAAGAACCCCAGCCACAAACCGGTTGTAATGCAGCTCATTCTCAACTCTGGGGAAATTATCGACGAATGCAGGGGCGGCGATGTGTTTTTACAGCCCCCTTCATCCAATAGTTTTGTTTCTGATGAATCTACTATCCCACCAAGGCATGGTTTTTCGATAGCTGAAGGTGCACTGACAGAAG…
Isoform_16559	ACTCAACCCTTGATTCATCTTCATTACCATTCTCTATACATAATTGGGAACCAGAAGGTGGGTTCCCAATGAGGATTCGTCCTGTTTGTCCCGGAACACTTCTGGGTTTCTGGGTATGTTTAGTACTGCTATTCTCTGTGAGCTTTTGCCATGCAGATGACAAATCAGTTGAGGTAGTTGGTTTTGGAGAATGTGCTGATTGTTCCCAGAGTAAATTTAAGGCTAGCCAAGCTTTTTCAGGACTACGCATAACAATTGATTGCAAGTCTAAAAATGGACACTTTCAAACAAGAGGTACTGGAGAGCTGGATAAACAAGGAAAGTTCAAAGTATCTCTCCCTCAAGAGTTGGTTCAAGAGGGTAAACTAAAAGAGGAATGCTTTGCACAGCTTCACAGTG…
Isoform_1658	GAAAACCCCAAGAAAAAGACCCTCCTTGATGAACTCAAAGATTCATCATCAATCACCTCCAAAATCGCACATATATCTTTCTGTCAAAATATATTACATCAATTCCACATTTTCTGCTCTTTTTTCACTCATTTCTCTCTCAATCTCTTCTCACGCATGCCTTACTCTTCACTCTGTATTTTTTTCCGCCTAAAATCTCCTTTAATATATTTATAGTATAAATTGTTTGATCGAGTGGTCTTCAGCTTGCTTTTCAATAGCTGTATGGGTGGTGCATGATTGGATCATTTGGGTGCTTAGCTATTATTCTTCCAGTCTCAGCGCCATCATTTCTTTATTCGGAGACTGTCAGATTCAACAAAAAGAAAATCTACTTGCTTTGGGGTTTGCTTGGTTTGT…
Isoform_16595	ACTCAACCCTTGATTCATCTTCATTACCATTCTCTATACATAATTGGGAACCAGAAGGTGGGTTCCCAATGAGGATTCGTCCTGTTTGTCCCGGAACACTTCTGGGTTTCTGGGTATGTTTAGTACTGCTATTCTCTGTGAGCTTTTGCCATGCAGATGACAAATCAGTTGAGGTAGTTGGTTTTGGAGAATGTGCTGATTGTTCCCAGAGTAAATTTAAGGCTAGCCAAGCTTTTTCAGGACTACGCATAACAATTGATTGCAAGTCTAAAAATGGACACTTTCAAACAAGAGGTACTGGAGAGCTGGATAAACAAGGAAAGTTCAAAGTATCTCTCCCTCAAGAGTTGGTTCAAGAGGGTAAACTAAAAGAGGAATGCTTTGCACAGCTTCACAGTG…
Isoform_1670	CAGCTTTGGATGGATATAGTGTTTCTATATTTGCTTATGGGCAAACCTTTTCAGGAAAGACACACACTATGGAAGGATCCAGCCATGATCGTGGTTTATATGCACGATGCTTTGAGGAGCTATTCGATTTATCTAATTCAGACATGACGGCAACTTCTCAATTTAAGTTTTTTGTTACAGTTTTTGACCTCTACAATGAACAGATAAGGGATTTACTCTTTGAATCAAGAAATGGTGTACCAAAGATCTGCACGGGATCACCCGAATCGTTTGTAGAACTTGTGCAGGAAAAAGTTGATAATCCATTGGACTTCTCTAGAGTCCTGAAAGCAGCTCTTAACACCCGAGGAACTGACGTACAGAAGTCCAACGCGTCTCATCTGATTGTCACAATACATA…
Isoform_16741	CCGCCGGAGATTCCGCGGCTAGACCACCAGCCCTTAATCGGCGATCTAGAGCGTTTCGCCGAGCTGCAGCAGCGCTTTAATTTATATTATCCGGTTACGACCCGGATAACGGACTTGGCGGAATTCACCGGCCGATTGCAATTAGCCGTTCCAATCGAAGCACATATAGAATCAGCTTTGGTCTTCGATGGCTATGATCCCGATCGAATCCGGGGCCGGATAAACGAAATCCGGGGGATCCTCTTTACACATCCCACTAGGGCGCTCCTTCTATCGGAGCCAACCCTTTTACGCTATTTAAATGAGATCGAAACGAATGGAACGCGGCAGAGCGCTCCCTATATGCGGGTAGTACGCGCCATTCGTAATTCGAATCTGATTCTTTAGTCTTTCTTAGCA…
Isoform_16773	CATCACACTGTACCTGAAAAATCTTAGAAAAGTTTGGCAATGCTAGGACAGGTCCATGACTCAACTCCTCCTTGATTAAAGAAAAAACACTTATCCTGCTATGCTCCCCTCTTAATTTCCCCCTTTTTAAGCACATCCGTCATTGGTAGTAACCCAAGATCACCATACTTAGTCAATAAGGGTTTCAATACCTGAGGAAATTCCTTTGCAGGTGCAGCTAATTCATCATTGGATACTAACACAAAGATCAGATTCAAACTCATCTTGTCCCTTGGACAACATGAAAGCACCATAGTCCTCCTTGGAAGTGGGAGTAAAACCTTCTTCTCTTAGAGGCAACAACTTAACCTCTCTACCTTCCCATTGGAACTCTATAATATTGCCCCTCAACTTATAAAT…
Isoform_1681	AAAACACTCATACCCAGTTGCGGTGGTGGTGGAGGAGTAAGGCACGCATTGCGATTCTCAACCAGCAGGCATGGCTGTATTTGTTCTAGCAGGTTTTCAAATTGGTCATTATCCTTGAAGTCATTCCACCACTACTCCATTGATTCTAAGGCTCTCTTCACCACCACAACAACAGCCTCTCTGTTTCAATCCCTCAGAGCAATCTAGCAAGTCACTGAAATTTATACTCTAGGATGAAGAAGAATTCCTAATATGAATTTTGGCATTCAGAAAGAGGAGCCTTAGGAAGAAGTTGATTGGTGAAAAGATAATATCTAAAATGTCTGAACACGAAGGGAAGGCTATCACAGCAGATGTCACTTCAGGAAATATGGTTTTCCAGCCTATCTTGAAGGAAGG…
Isoform_1695	GGTGTGTTCTTTCTGTGGGGAACGCTTAGATTGGGAATTGGAGCTTTTCACTAATTTTTTTAAGAGAGACTATTCGTCATGTGTCACGAGAGAAGTTGAGGATAAGCTTATCTCGTCCAAATTAGAGCAAGACGGTTTATTTATAATCACAAATAATTACAAGAGGGACAAAAATACCCATGGCCGAATCCAGGGTAATACAAATAAAATAAACACACTAAACATAAAATAAGGTCCAATCAACCATGTATTCCAACACTCCCCCTCAAGCTGCTGAGTAGATATCTATGAGGCCAAGCTTGCTAATAGAAGTTCTTAACAGGAAGGACCCACTGGCTTAGTCAATATATCTGCCATCTGATTCTTGGAGGGAACATAGAATGGAGAGACAATACCATT…
Isoform_16950	GGGCAGAAAGCTACTCATGAAGGCTTTGGGAAGACCTCATGTTCATTTGGAAGTGCATCTCAACAAACACAATCTACTTTTCGTTCGTCAGGTCCATTTGGTTCGACTATTGGCGGGACCACTACAGCCTTTGGGCCCACATGGAAAGGACTTAATACTACAACCTCAACATCTGGACGCACACCCCCAGCTTTTCCTGTTCAAGGCAAAGGAATTAAAATAGCAACGCATACTGCAACAACTGATGTAGATGTCAATAAAATCTTTGTGTCAATATCAGCGATGCCTGCCTTCAAAGATAAAAGCCATGAAGAATTAAGGTGGGAGGACTATCAACCAGGTGATAAAGGTGGGAAAATTCTTCTGGCCAACGTGCAGGATTCACTATTAAGTCAAGCC…
Isoform_1696	CTTTTTTTTTTTTTTTTTTTTTTTTTGGTTCTTGGAACCCCATCTTTTGATATTTTTTTTGTTTGGTATACATTGTTTTGTTCTTGGAACCCTCGACCACAACAGTTTATATCATTGGTTTCACTTGCCTATTATTTTACAGATCTTTTGATATTTTTTTTTGTTTGGTATACATTGTTATTTGCCATATAATCTGTTTTATTTGTGGTATCTTTTTTTGATGATGAATTCTGAAAAGGAAAAGAAGGTGGTTTCAAGGAAAAGAAAGGGCTCCAGCCAAGGGACCGAAGAAAGGCTGTATGCAAGGAAAAGGTGGGCCCGAAAATGGGAAATCTAATTTTAGGGGTGTTATTGGGTTGCTGAAATTCGGGAACCAGCTGGATGGGGTACTTAAAATAG…
Isoform_17096	ACTCAACCCTTGATTCATCTTCATTACCATTCTCTATACATAATTGGGAACCAGAAGGTGGGTTCCCAATGAGGATTCGTCCTGTTTGTCCCGGAACACTTCTGGGTTTCTGGGTATGTTTAGTACTGCTATTCTCTGTGAGCTTTTGCCATGCAGATGACAAATCAGTTGAGGTAGTTGGTTTTGGAGAATGTGCTGATTGTTCCCAGAGTAAATTTAAGGCTAGCCAAGCTTTTTCAGGACTACGCATAACAATTGATTGCAAGTCTAAAAATGGACACTTTCAAACAAGAGGTACTGGAGAGCTGGATAAACAAGGAAAGTTCAAAGTATCTCTCCCTCAAGAGTTGGTTCAAGAGGGTAAACTAAAAGAGGAATGCTTTGCACAGCTTCACAGTG…
Isoform_17232	GAACCAGAAGGTGGGTTCCCAATGAGGATTCGTCCTGTTTGTCCCGGAACACTTCTGGGTTTCTGGGTATGTTTAGTACTGCTATTCTCTGTGAGCTTTTGCCATGCAGATGACAAATCAGTTGAGGTAGTTGGTTTTGGAGAATGTGCTGATTGTTCCCAGAGTAAATTTAAGGCTAGCCAAGCTTTTTCAGGACTACGCATAACAATTGATTGCAAGTCTAAAAATGGACACTTTCAAACAAGAGGTACTGGAGAGCTGGATAAACAAGGAAAGTTCAAAGTATCTCTCCCTCAAGAGTTGGTTCAAGAGGGTAAACTAAAAGAGGAATGCTTTGCACAGCTTCACAGTGCATCAGCCACACCATGCCCTGCCCACAATGGGCTGGAGGCATCAAAG…
Isoform_17313	ACTCAACCCTTGATTCATCTTCATTACCATTCTCTATACATAATTGGGAACCAGAAGGTGGGTTCCCAATGAGGATTCGTCCTGTTTGTCCCGGAACACTTCTGGGTTTCTGGGTATGTTTAGTACTGCTATTCTCTGTGAGCTTTTGCCATGCAGATGACAAATCAGTTGAGGTAGTTGGTTTTGGAGAATGTGCTGATTGTTCCCAGAGTAAATTTAAGGCTAGCCAAGCTTTTTCAGGACTACGCATAACAATTGATTGCAAGTCTAAAAATGGACACTTTCAAACAAGAGGTACTGGAGAGCTGGATAAACAAGGAAAGTTCAAAGTATCTCTCCCTCAAGAGTTGGTTCAAGAGGGTAAACTAAAAGAGGAATGCTTTGCACAGCTTCACAGTG…
Isoform_17376	GACGCTCTCTCTCTCTAACAATTTACAATCCCCATTTTTCTTGAGCTGAACCGTGAGCCAGATGGCTTTACTCCTCTCTACTCCTTCTGCTACATGTATTACAGTAGCATCAACCAACGCTCCTCTCAAAACCCTTCCCCTTTTCTCTACTAAATCCCTAAACCTAAATCTCCCCTCAAGAAGAAGTAAAAATTTCTCTCCTTTACAAGTTGCTTCTCCTTCAACCCAACCATCGACAACTTCTGAACAACAAGACCAATTGACTTCAGAGACGTCGCCGCTTGATAAAAATCAAGATTATGAATACGGAGTTGAATTTGATGATGATGGTGAGAGTTCGTCATCCAAGTTCGCTTGGAGAGATCATTGGTACCCGGTGTCTTTAATTGAAGACTTGGA…
Isoform_17450	AGGAGTACCTGAGGATGATTCTGGCATAGTAGGCTGTGGATCCCGAGCGCGAGGGCGACGAACATAAGACCTCTCAAAGAAATAAGAGGGTGGAGAAGATTCTGCCACTGGGAGATCAAGGACAGGGACGGGAAGTGCCGGTGGAGAAGATGACATAGGAGGTGTCACAAAAACCTTGAAAAGGCTAGTACTAAAATAAGGAGTATTCTCAAAAAAGGTGACATCCATTGAGTAATAAGTGTGACGAGTAACTGGATCATAACACCTATATCCTTTGGATACAGATGAATAACCAAGAAAAATGCAACGAATTGTCTTGTCATCCAATTTAGTTCGAGATGGACTCCTATTCTGTACGAAACAGGTGCACCCAAATACACGAGGTAAAATAGGAAATAG…
Isoform_17623	CGAGTGTGATCATCAATAAAATGTGACATAGTATCTGTGGCCAGATAGAGCAATAGTGGGAGAAGGACCCCAAACATCAGAATGAATAAGATCAAATGGAGCAGGTGCACGATGCATGCGAGAAATGTAACTAGTTCTAACATGCTTAGACAATTCACAGACAACGCATTTAAATTTATGAAATTTGCAAGCTTTTATTAAATCTGGAAATAGTAAACACAAATACTGAAAGTTAACATGTCCAACACGAGCATGCCACAATTCAAGATTATTAACGAAAAAACATAAGAACCCGAAGCGGGTAACACAGAAGCTTGCAAACCAGAACTAGGTGGAGATAAAGGTGGTGGGTCTCCAAAGTAATACAGCCCGTCGCGCTCATGGCCCATACCAAAAATC…
Isoform_17655	AGGAATAGCTTTCCCTATTATCATGTCAACTTGACTGTAATTATTAGGTAAAATCATACTATAACCTATAGTAAAATAACCAGACTTAAACCGTCTAGTGTACACATATTTGAATAACAGTCGTATTACTGCCAATGCTATCACTTCAAAATCTACACACCGCACGTAAGGTTTTTTAAATTCTACTTGAGCTATTATCAATTAATAACTGATCGTAGACCACAGAACTATGATCTACGACCACCCTAAATATGGAACCTTGCTCCTATCATGATAAAGAATGTTATATAATTTCTTCCAATAATGATTGAACATATCAACAGAATATATGGAATGATTATCGTGTGCTATGGTTGGTCTACAATCATAGTTGTATGGTCTACAATCAGTTGTTCGTGG…
Isoform_17889	TTTCTGGGTATGTTTAGTACTGCTATTCTCTGTGAGCTTTTGCCATGCAGATGACAAATCAGTTGAGGTAGTTGGTTTTGGAGAATGTGCTGATTGTTCCCAGAGTAAATTTAAGGCTAGCCAAGCTTTTTCAGGACTACGCATAACAATTGATTGCAAGTCTAAAAATGGACACTTTCAAACAAGAGGTACTGGAGAGCTGGATAAACAAGGAAAGTTCAAAGTATCTCTCCCTCAAGAGTTGGTTCAAGAGGGTAAACTAAAAGAGGAATGCTTTGCACAGCTTCACAGTGCATCAGCCACACCATGCCCTGCCCACAATGGGCTGGAGGCATCAAAGTTGGTCTTGAAATCCAAAACAGCTAGCAAACACACATTTGGACTGCCCGGGAAGCTAAA…
Isoform_17980	ATTCGGACTCGGGTAGTTGGCGAAAATACCTCAACTCGCCCGAGGATAAGGAGGAAAATTCGGAGCCCGGGCCCGAATCGTCCACAAGCCATAACCCCGGGCCCGAATCGTCCACAAGCCATAACCCCGGGCATGGAATAATCGAGCGCCCGAGCCCGCCGCCGCCGGAGATTCCGCGGCTAGACCACCAGCCCTTAATCGGCGATCTAGAGCGTTTCGCCGAGCTGCAGCAGCGCTTTAATTTATATTATCCGGTTACGACCCGGATAACGGACTTGGCGGAATTCACCGGCCGATTGCAATTAGCCGTTCCAATCGAAGCACATATAGAATCAGCTTTGGTCTTCGATGGCTATGATCCCGATCGAATCCGGGGCCGGATAAACGAAATCCGGGGGA…
Isoform_18049	ACTCAACCCTTGATTCATCTTCATTACCATTCTCTATACATAATTGGGAACCAGAAGGTGGGTTCCCAATGAGGATTCGTCCTGTTTGTCCCGGAACACTTCTGGGTTTCTGGGTATGTTTAGTACTGCTATTCTCTGTGAGCTTTTGCCATGCAGATGACAAATCAGTTGAGGTAGTTGGTTTTGGAGAATGTGCTGATTGTTCCCAGAGTAAATTTAAGGCTAGCCAAGCTTTTTCAGGACTACGCATAACAATTGATTGCAAGTCTAAAAATGGACACTTTCAAACAAGAGGTACTGGAGAGCTGGATAAACAAGGAAAGTTCAAAGTATCTCTCCCTCAAGAGTTGGTCTTGAAATCCAAAACAGCTAGCAAACACACATTTGGACTGCCCGGGA…
Isoform_18138	ACCATTGCAGCCTTGCACGCAAAGTTTTACCACTCTCTCTCCCTCTATAACACGCTCTCTCTCTCTAACAATTTACAATCCCCATTTTTCTTGAGCTGAACCGTGAGCCAGATGGCTTTACTCCTCTCTACTCCTTCTGCTACATGTATTACAGTAGCATCAACCAACGCTCCTCTCAAAACCCTTCCCCTTTTCTCTACTAAATCCCTAAACCTAAATCTCCCCTCAAGAAGAAGTAAAAATTTCTCTCCTTTACAAGTTGCTTCTCCTTCAACCCAACCATCGACAACTTCTGAACAACAAGACCAATTGACTTCAGAGACGTCGCCGCTTGATAAAAATCAAGATTATGAATACGGAGTTGAATTTGATGATGATGGTGAGAGTTCGTCATCCAAG…
Isoform_18159	ATTCCCAACGCAGAGTACATGGATCTTCGTCTTCTCCAATTACTCGGTCTCTTTGATCTACCGTTTTCCACCTCTATCGGTTTGTTCGCTCAATCATTACTCGAAGCGTCTCCGTCTCCCTGTGTCTCGAATTCTTAACTTTCTTTAACTTCTCCTCTCTCATATGTTCCAACTCTCATAAGTCTCTCGATCCTTCCTATATTCTCATTATCCTCTCCCTCTCTTGAACGAAATAAAAGAATGATTCTTCTCTCAGTCTCTCCGCTCTCTGGACCCTCATGAAATAGAACGACCGTAGAAGAATGGCATCAATCAAATATTCAGATCTACAGGATTTTTTTATTCTTCCATCTCTTCTCCCTCTTTGATCCCATTGTCGTGATTTACTCTTTAGCCACA…
Isoform_1817	ACACTCATACCCAGTTGCGGTGGTGGTGGAGGAGTAAGGCACGCATTGCGATTCTCAACCAGCAGGCATGGCTGTATTTGTTCTAGCAGGTTTTCAAATTGGTCATTATCCTTGAAGTCATTCCACCACTACTCCATTGATTCTAAGGCTCTCTTCACCACCACAACAACAGCCTCTCTGTTTCAATCCCTCAGAAAGAGGAGCCTTAGGAAGAAGTTGATTGGTGAAAAGATAATATCTAAAATGTCTGAACACGAAGGGAAGGCTATCACAGCAGATGTCACTTCAGGAAATATGGTTTTCCAGCCTATCTTGAAGGAAGGGATTTTCCGATTTGATTGTTCTGCAAATGATAGAGATGCAGCATATCCTAGTCTTTCTTTTACTAATACCAAAGAT…
Isoform_18212	ATCGCAAAAACCCTACCCATCCTCGTTTTTGTGAAACAGCCATGGTGGCCGCTTTCGAGCTAGAAGTTCACTTCAATCCAGATGGATGGGGACCGATTTCTACTCTTCCAAACCACCCTACGAACGTCCCCTTTGCACCCTTCTCCCGTTCTGACAAAGTCGGCCGCATAGCCGATTGGAATCGCAACTACAATCAGAACTCCCGTAACAAAAATCCCGCTGATTCGGCCTTTGACTTCACAGGTGACGACTCTTTCGGTGGCGGCGCTGGCGACGAAGATCAAACTTTTCGCCTTGTCGACGGCAAGCCTCCTCCTCGTCCTAAATTCGGTCCCAAGTGGCGATTCCAGCAACAGAAACAACTTCCACAGCGACGTGACGAAGAGGTTGAAGCCCGAA…
Isoform_18221	acccgtGAACCTACCCATCCTCGTTTTTGTGAAACAGCCATGGTGGCCGCTTTCGAGCTAGAAGTTCACTTCAATCCAGATGGATGGGGACCGATTTCTACTCTTCCAAACCACCCTACGAACGTCCCCTTTGCACCCTTCTCCCGTTCTGACAAAGTCGGCCGCATAGCCGATTGGAATCGCAACTACAATCAGAACTCCCGTAACAAAAATCCCGCTGATTCGGCCTTTGACTTCACAGGTGACGACTCTTTCGGTGGCGGCGCTGGCGACGAAGATCAAACTTTTCGCCTTGTCGACGGCAAGCCTCCTCCTCGTCCTAAATTCGGTCCCAAGTGGCGATTCCAGCAACAGAAACAACTTCCACAGCGACGTGACGAAGAGGTTGAAGCCCGAAAG…
Isoform_18245	ATGTCATTGCTGATTATTCAAAGCAAACAAAGCAAAGTCTCGCCCAAGAAATAATTAAATTGAGGACCCAGGTGGAGGGTCTTAATCACAAATCCCAATATCTTGAAGCAGAACTTGAAAAAACATCAATGCATTTAAAAGAGACAGCTAAAATTGCCAAGGAGGAGGCTGAAAAGAACAAGTCTTCAAAGGAAGTAATAAGATCTCTAACGGCTCAGATACAGTATTTAAAAATACATAGAGATACAGAAAGAAGAAAAACACACACAATGGAGACAAGGGAAAATAAGAGGTACATTATCTTTCTCTCCTTAAGATTATCTAGGTAATGTAAAGCTCTGTTGCTTTATGATTAATTAAATTTTTTTGATGTGCTCCTAAGTAAATTTACGTTTTTTT…
Isoform_18440	GAAGAGGGTTACAAATTTCTGTGGAGGATTCTGGCATAGTGGGTTGTGGAGGATCCTGAGAGCGTGGGCGACGAGCATAAGACTTCTCAAAGAAATGGGATGGAGTAGGAGATTTCTCCACCGGGAAATCAAGGATGGTATAGGAGGAACCAGTGGAGAATTAAACATAGGAGGTGTCACAGAGACCTGCAAAGGGTTAGTACCAAAATAAGGAGTGCCCTCGAAAAATGTGACATCTATTGAGTAATAAGTATGACGAGTAACAGGATCATAACATCTACACCTTTTGGACACATAGAAATAACCAAGGAAAATACAACAAATTGCGTTGTCATCCAGTTTAGTTTGAGGACTCCTATTTTGTACGAAACAAGTGCACCCAAAGACATGAGGTAAAAT…
Isoform_18444	TGTTCAGAGTTATGAGATATTCTCCCGGACATGTGGTGGTGACGGGCATGTTCTGTATTACAAAAGTTCATTTTATTTAATAGGGTAAGATGCCTTCTCCTTATCTTTCAAGATTTAGAATTGCAGCCTGGCATGGAATTAAGAGATCGGTCATTGGGAAAAAAGATGGCCTCCAAGAGTCAATAGAATTACTAACTTGTCAGGGAAAATTGTTTGGAAACTCAAGATTCTTTCATTCCAATGCATCTACTCTCACGGACCTGTATGTAGTAGTGCGGCCTGGTATATCTGTTGCTGCAAGATCAGATTTTCAATTAGTTGATCAAAGAAGGAACCTTTCTGTAGTTGGAGCACTTTCTCGCACATTTTTCATCCAATCTATTTCAGGCCCCTCGTTGC…
Isoform_18540	TGTTCCGCTTCCAGTTTCATTACCACCGGGTATGATGTTTCAGCAACAACAACAATTTGAGACCCCAGATGAAAAGCCTCAGATTTTCAATCCACAACAACAGTTGCTGATAAACCAGCAATCCCTAAATCCAAACTTTTTCCCTGTTTTCCCTTACCCTCAACAAGACCCTCACCATCCACTTCAGCCTCAACCCAAACGCCACAACTCAGGCGGTATAAACCAAAACCATCAAATTCCAAAAGCCCCTTTTGCTGATCTGGGTCATGAGCTTTTACTCAGAAAACAAGAGCAGCAGCAGCAGCAACAACAGCAGCACCCACCGGGTTTTCATAACCAATTGCAATTACTGCCCTCCCATCATCCTCATAATGTTGAGCAAAAATCAACCTTGATGGT…
Isoform_18606	ACTCAACCCTTGATTCATCTTCATTACCATTCTCTATACATAATTGGGAACCAGAAGGTGGGTTCCCAATGAGGATTCGTCCTGTTTGTCCCGGAACACTTCTGGGTTTCTGGGTATGTTTAGTACTGCTATTCTCTGTGAGCTTTTGCCATGCAGATGACAAATCAGTTGAGGTAGTTGGTTTTGGAGAATGTGCTGATTGTTCCCAGAGTAAATTTAAGGCTAGCCAAGCTTTTTCAGGACTACGCATAACAATTGATTGCAAGTCTAAAAATGGACACTTTCAAACAAGAGGTACTGGAGAGCTGGATAAACAAGGAAAGTTCAAAGTATCTCTCCCTCAAGAGTTGGTTCAAGAGGGTAAACTAAAAGAGGAATGCTTTGCACAGCTTCACAGTG…
Isoform_18871	ACTCAACCCTTGATTCATCTTCATTACCATTCTCTATACATAATTGGGAACCAGAAGGTGGGTTCCCAATGAGGATTCGTCCTGTTTGTCCCGGAACACTTCTGGGTTTCTGGGTATGTTTAGTACTGCTATTCTCTGTGAGCTTTTGCCATGCAGATGACAAATCAGTTGAGGTAGTTGGTTTTGGAGAATGTGCTGATTGTTCCCAGAGTAAATTTAAGGCTAGCCAAGCTTTTTCAGGACTACGCATAACAATTGATTGCAAGTCTAAAAATGGACACTTTCAAACAAGAGGTACTGGAGAGCTGGATAAACAAGGAAAGTTCAAAGTATCTCTCCCTCAAGAGTTGGTTCAAGAGGGTAAACTAAAAGAGGAATGCTTTGCACAGCTTCACAGTG…
Isoform_1890	tATACATATCTCTTTCTGCCTCTCTTTGTTACATAGAAAAGTAATTGGAAGAGCATAAAAAGGGAGAGGAAAAAGAGGGTCCTCTCTCTCGCTCTCTCTTCTTCTTATTATGCCTCCTCTCAGATCTTAGATTATCTCTTGCTTTCCCATCTGGGTTTTCTTCATTCGGACTTCTGGATTGCGGTCGATTAGTTATCGTATACGGAAGATCCGATGCTCCTGAACTGAATCCAAGCATACCCATTTCGTAGCTCCTTATACGAAATATCCAAGTTTAGCGTCTTTAGTAAAAAGAATGGAAATGGAGCTTGGGAAACTATTTGTTGGTGGAATATCATGGGACACAAATGAAGACCGTCTCAGAGAGTATTTTCAAAATTTTGGAGAAGTTGTGGAAGC…
Isoform_18905	AAGTACAAATATCCTTGAAACAAAGAAAGAAAGGATTAAAAAAAACCAGAGGAGGAATGGAGTTCTCTTCTTTGGTACGACTACTGGCTCTTGTTGCATGCCTTTTTCCTGCTCTCGTTGAATGCAGAATTCGCCACTACAAGTTTAATGTGGTGACGAGGAATAGCACCAAGCTATGTTCAAGCAAGCCCATTGTCACCGTGAACGGGCAGTTCCCGGGACCGACTCTCTACGCTAGGGAAGACGATACGGTGCTTGTTAAGGTCGTCAACCATGTCAAATACAATATCTCCATCCATTGGCATGGTATCAGGCAACTTCGAACCGGCTGGGCTGATGGACCAGCATACATTACACAATGCCCTATCCAGCCTGGGCAAAGCTATATATACAACTTTA…
Isoform_19041	GTTAAAAGGGGGGCCGGCAAATGATACCAACTCCATGACCTGATTCTCTACCACTATTAGTAGGCATGATGAACAGTACTTTGTGAGCTATTTTTTATGGAGTTATTATACATGTAAAATACTGTTCATGGAGTACTGTTAATGAAAACAATATTAAATTATTCTCATTATTCTCCATGAGTAGACTCCATGGACAATGCCACAATTAGGGTTGAGGCATGAGCTTTGAGTTGAGCGTGGGTCGGTTTGCTTTGTCTTTTTGCAAATATTTGAATTAATGAGATATTTGTTGTTCACTAGTTTGAGATAGGTTTTTTTTTTTTTTTTAATGCAACCCAATTTAATTTTTTTAATGATTTAATTCGGTAAAGTTCATAAATATAATATTTATTGTGTTTC…
Isoform_19113	ACCCCCTCATTCTCTTTGCCTTTTTTCTTTTCTTTTTTTAATTATAGATTGAGATCAGTCTCAACTTCAAACATGGCACGCTGTGAATTCTTCCTGATTTGTGCTTTAACTCTTCTAGCTTATTCAACGGCTTCTGCTGCAGTAATAGAACACTCATTCTATGTCAGAAACTTGACTATCCGGCGCCTGTGTAGTGAGCAAGTGATAACAACGGTGAACGGAAAATTTCCAGGTCCAACCATACGGGTTCGAGAAGGTGACACTCTGGTTGTTCATGTCTATAACAAGTCACCTCACAATATCACTATTCACTGGCATGGAGTGATTCAGAAATTGACAGCATGGGCAGATGGAGCTGATTTTGCGACTCAATGCCCGATTCAGCCTGGGAATTTATAT…
Isoform_1913	GGTGGTGGTGGAGGAGTAAGGCACGCATTGCGATTCTCAACCAGCAGGCATGGCTGTATTTGTTCTAGCAGGTTTTCAAATTGGTCATTATCCTTGAAGTCATTCCACCACTACTCCATTGATTCTAAGGCTCTCTTCACCACCACAACAACAGCCTCTCTGTTTCAATCCCTCAGAAAGAGGAGCCTTAGGAAGAAGTTGATTGGTGAAAAGATAATATCTAAAATGTCTGAACACGAAGGGAAGGCTATCACAGCAGATGTCACTTCAGGAAATATGGTTTTCCAGCCTATCTTGAAGGAAGGGATTTTCCGATTTGATTGTTCTGCAAATGATAGAGATGCAGCATATCCCAGTCTTTCTTTTACTAATACCAAAGATAGGGACACACCAATTGTG…
Isoform_1921	aGGAAGTTTCTTTCTACCACCTGATCCTCACTTCGTAATAGGAACAGAGCTTAAAAGTTCAAACCCCTTGTCCAATTTTCCATCTTCTTCAGCTGCAAAAAACTAAACAAACCATGTCAGGTGATAAAGTTTCGCATTATGATTGTGGTACTTTGCTTCTTAACATAAGTACAAGCACCCTCACCATAGCCCAAAAGCGATGGCGAACAGCTTACGCTACGATCTACTCTATCCGGGTCATGATTTCTATTGCCAATGAAATTGTATCCAAGAAGAATAAGGGCATCCCACACTCTCATCCATACACTATCCTTGATATTGATCAACCCAGCACTTCTACACAAGATAATAACGATACCGATACCGTGCCTCGACAAGGTTATTCCGACAATATCAACC…
Isoform_19357	ACTCAACCCTTGATTCATCTTCATTACCATTCTCTATACATAATTGGGAACCAGAAGGTGGGTTCCCAATGAGGATTCGTCCTGTTTGTCCCGGAACACTTCTGGGTTTCTGGGTATGTTTAGTACTGCTATTCTCTGTGAGCTTTTGCCATGCAGATGACAAATCAGTTGAGGTAGTTGGTTTTGGAGAATGTGCTGATTGTTCCCAGAGTAAATTTAAGGCTAGCCAAGCTTTTTCAGGACTACGCATAACAATTGATTGCAAGTCTAAAAATGGACACTTTCAAACAAGAGGTACTGGAGAGCTGGATAAACAAGGAAAGTTCAAAGTATCTCTCCCTCAAGAGTTGGTTCAAGAGGGTAAACTAAAAGAGGAATGCTTTGCACAGCTTCACAGTG…
Isoform_19510	taGTTATATAATTCTATATAATTGATGAAAAGCTATGGTTTTGTGCTACAAAAGATCAAGCAAAATGTCTTTGCTATCGCTTCTACAACAACTATGGGGAGACCTGCAAGGAATAACAAACTTTAATTTCTTTATCCTCTCATTTATTTTCCTCATCACTCTTCTCCTTTTGTTCAATTTTTCTTCTAGAGCTAGCGGTGGCAAAGGAAAACTAAACTTACCTCCATCACCACCAAAGCTACCATTAATTGGCAATCTTCACCAGCTAGGCCAGCTCCCTCATCGATCCCTTCGAGCCCTCTCTGAAAAATATGGCCCTCTTATGCTTCTACAACTGGGCAAGGCTCCCACTCTCGTGGTTTCATCTCCACAATTTGCTAGAGAAATCATGAAGACCCA…
Isoform_19531	ACTCAACCCTTGATTCATCTTCATTACCATTCTCTATACATAATTGGGAACCAGAAGGTGGGTTCCCAATGAGGATTCGTCCTGTTTGTCCCGGAACACTTCTGGGTTTCTGGGTATGTTTAGTACTGCTATTCTCTGTGAGCTTTTGCCATGCAGATGACAAATCAGTTGAGGTAGTTGGTTTTGGAGAATGTGCTGATTGTTCCCAGAGTAAATTTAAGGCTAGCCAAGCTTTCAGGACTACGCATAACAATTGATTGCAAGTCTAAAAATGGACACTTTCAAACAAGAGGTACTGGAGAGCTGGATAAACAAGGAAAGTTCAAAGTATCTCTCCCTCAAGAGTTGGTTCAAGAGGGTAAACTAAAAGAGGAATGCTTTGCACAGCTTCACAGTGCA…
Isoform_19604	AATTCTGTAGTGTAGTTGGAATCTATTAGCAGCGGAATTCTCCCTTGACTCGATCTTTCATTTCATTATGGAATTTTCTCCCAGAGCTGCGGAACTAACGACTCTATTAGAAAGTAGAATTACCAACTTTTACACGAATTTTCAAGTGGATGAGATCGGTCGAGTGGTCTCAGTTGGAGATGGGATTGCACGTGTTTATGGATTGAACGAGATTCAAGCTGGGGAAATGGTTGAATTTGCCAGCGGTGTGAAAGGAATAGCGTTGAATCTTGAGAATGAGAATGTAGGGATTGTTGTCTTTGGTAGTGATACTGCTATTAAAGAAGGAGATCTTGTCAAGCGCACCGGATCTATTGTGGATGTTCCTGCGGGAAAGGCTATGCTAGGGCGTGTGGTCGA…
Isoform_19752	ACTCAACCCTTGATTCATCTTCATTACCATTCTCTATACATAATTGGGAACCAGAAGGTGGGTTCCCAATGAGGATTCGTCCTGTTTGTCCCGGAACACTTCTGGGTTTCTGGGTATGTTTAGTTCTGCTATTCTCTGTGGGCTTTTGCCATGCAGATGACAAATCAGTTGAGGTAGTTGGTTCAAGAGGGTAAACTAAAAGAGGAATGCTTTGCACAGCTTCACAGTGCATCAGCCACACCATGCCCTGCCCACAATGGGCTGGAGGCATCAAAGTTGGTCTTGAAATCCAAAACAGCTAGCAAACACACATTTGGACTGCCCGGGAAGCTAAAATTCTCGCCAGCAACGTGCACTTCAGCCTTCTTATGGCCTCACTTTAAGTACCCGCCGCTACCC…
Isoform_19838	AATTCACTCAACCCTTGATTCATCTTCATTACCATTCTCTATACATAATTGGGAACCAGAAGGTGGGTTCCCAATGAGGATTCGTCCTGTTTGTCCCGGAACACTTCTGGGTTTCTGGGTATGTTTAGTACTGCTATTCTCTGTGAGCTTTTGCCATGCAGATGACAAATCAGTTGAGGTAGTTGGTTTTGGAGAATGTGCTGATTGTTCCCAGAGTAAATTTAAGGCTAGCCAAGCTTTTTCAGGACTACGCATAACAATTGATTGCAAGTCTAAAAATGGACACTTTCAAACAAGAGGTACTGGAGAGCTGGATAAACAAGGAAAGTTCAAAGTATCTCTCCCTCAAGAGTTGGTTCAAGAGGGTAAACTAAAAGAGGAATGCTTTGCACAGCTTCA…
Isoform_19860	TCTGTGTATAAATTGGAAAGTTATTCAATCACTTGGGATCTGAGCTTTCCCAGAAATCTTCATGAAGCTGAGATTGTGATGCAGAAGCAAAATAAGACTTCTAAGGTCTGTTTTATTTGTCCATTGGCAGCAAAAGGAACACCACAAGAAAGAGTTGCTAAGTCTATAATTTGTCTTTATTTGATGTTTATGTCTATATATTAGTTTTAATAATATATTTATGTTGTATGCTGTTATAGAGTCTATAATAAGTCAGTTTTAAGAGTCTTTATATGTTATTAGTAACAATCTAAGAGTTAAGAGTCTTTTATGATTATTATTATTATTATTATTATTATTGTCTTGATAACGGTCCAGGGTCTTTATATGTTGGTCTTAAAGAGTGTTTAGGTTTTGAAA…
Isoform_20021	ACTCAACCCTTGATTCATCTTCATTACCATTCTCTATACATAATTGGGAACCAGAAGGTGGGTTCCCAATGAGGATTCGTCCTGTTTGTCCCGGAACACTTCTGGGTTTCTGGGTATGTTTAGTACTGCTATTCTCTGTGAGCTTTTGCCATGCAGATGACAAATCAGTTGAGGTAGTTGGTTTTGGAGAATGTGCTGATTGTTCCCAGAGTAAATTTAAGGCTAGCCAAGCTTTTTCAGGACTACGCATAACAATTGATTGCAAGTCTAAAAATGGACACTTTCAAACAAGAGGTACTGGAGAGCTGGATAAACAAGGAAAGTTCAAAGTATCTCTCCCTCAAGAGTTGGTTCAAGAGGGTAAACTAAAAGAGGAATGCTTTGCACAGCTTCACAGTG…
Isoform_2004	ACTTGTTCATTCCACCACCACGTCTCCTTACAAAATAGTCCTCGTCCTCTAGATTCCCCTAAGACCTCTTTTGCTACCCTTTTAATACAAGTAGTCATCTTATTCCACATCAGGTCCGGTTCACCCTCTACGGTCCATGTCCCTTCTCTTAACAAACGATTCCTAAAGACTTCAACTTGCTCTCCCCGGAAGTTCCACCACCTAGTAGTCAGGATCATAGGTCTATTTCTCCTTTGGCCTTGTCCTCTAATACAAACATCCGATATAAGTAGTCTATGTTGTGTAGCCAGACTCTCGCCTGGAATCACCTTGCAATCCTTGGTAGTTAGTCGATCTACTCTTCTAGTCAGAAAGAAATCAATTTGGCTCATATTGGTCCATTCTTAAAGGTTATAATGT…
Isoform_20121	CCCCACACATTCTTCCTCCTCCTCCAAACAAGTCTACTACATCTCGTTCTCTTTTTCCTTCCCCATCTGCGCGCTCTCTTGGAGAATGAAATTTCCCGTTACGTATCAGCAATCTCCCAGCCCCAAATCAGTTTCCTGCAACAATACCGCCCGAAATACCGGCCTCTTCCACACCACCAACTTGAGCTACGAACCAACTTCGGTCCTCGACCTACGCCGTAGCCCTAGCCCTGCTACCGATCTACCGGTCTCCGGCCCCGAAATTTCGGCTACTTCCGATGTGGTGTCGCTCTCTCAGTCAAACGATCTTGAGTGGGACGAACGCATGCTTCATAACTTGGACGACTGGGAGTCCATCATGCATGATTTCGGCTTACATGACGATTCCGCCGCCACTTT…
Isoform_20156	GGTCTTCTCCGGAATTCGGATCAAACGCACAAGACCATGAATTCAATTCTCAGGGGTTTTGGTTGCTGTGTATCACTTATCTTATGAGAAAGCTTATTAAGGAATATGACTTCAAAAGGTGAGGCTCTCACAAGTGATCATAGTGACTGATTATTTACTGTATATTTAATTTTGTACAGTGCTGCAAGGCCTCATTGAGGCCATCTCAATCAGCGGCCTTACATGATTAATGTGGTTATATCGACATCATGTGAGACTGTGGCCTCAGTGAGGTCATGAATCATTATCCTTTAACCTTCTCTTATAGCTGTGGTTGCAAACTGCCCACTCAATTTTGAAGACCAGGAAATATTTATTATTACCAGTTTGTACATTTCGGTTTTTTATCAGAAGAGGTGG…
Isoform_20187	AAACCAGATACAGAGTATCAACCCCATTAAAAAGAAATGACCAAGTCCAATAGTTTCAGCTGGGGATCTTTATTTCTGCTCTGTTTTGTTGGGTTCATTTCTCTCCCTACCGAAGCTGCTGTGAAGAAATACCAGTTTGATGTTCAAGTGAAGAATGTTAGCAGGTTATGCCATGCAAAACCTATTGTTACTATTAATGGTTTGTTCCCAGGACCAACAGTTTATGTCAGAGAAGGAGATAGAGTTCTCATCAATGTTACCAATCATGCTCAGTATAACATGTCAATTCATTGGCATGGAATAAAGCAATTTCGAAATGGCTGGGCGGATGGACCGGCTTATATAACACAATGTCCGATCAAGACAGGGCATAGTTACACCTATGACTTTAATGTAACA…
Isoform_20238	GGAAAACCTATGAAGCATGGGTGCGGGTGCAGATGCGGGTGAGGGTGCGATGCGGGTGCGGAGATTCGGCATTTAAAAAAAATTAGCGGATGCCGGTGCGGCGACAATATAGTAATATAGATATATTTATTTATCTATATTCTATATAAATATCTAAAAATATATTTTAATTTATTTATTTCATTCTAAGTTTTTTTTTTTAAATAGACACTCTTGTCGACTAGTGGCCTTTTTTAAAATTTTAATAACCTTATTACATTATAACAATTAAAACAATTTGAGTTTCAGATATGAACACTAAACACTAAGATGGTGTTAAATTCTGTCAAACATGAGATAAATATTTTCTCTAGTGTGAGAGGCAGTTGCAAGAAGAAGGGATAGAGATGAGCTAGGCAG…
Isoform_20250	TAGAAGAGAATTGGAGTCGCACCGCAAAGAGTGAATTGCAGAATTGCTACAGAGAGATAAGAGCAGACTGAATTGCAGAATTGCTACAGAGAGATACGAGCAGTTCTCTCTTCGATGGCGGAGCTTCATTCTTTTTTTTGTTCTTCCCTTCTGGCTGTTGAAATTGCAGCAAATAAAATCCTGATCCCTTCCTTTTTGTTTGAAAAAAAAATTGATAAGAGATGTTGATCGATCGGCTTCTTGTTTGCAAAAAGAATATAAGAGATGGTGATCCTTCTGCTTTTTGTTTGAAAAAAAAAAATGATAGAGATGAACTCTTAACTCTACAAACGTGGGAGTGTGGGACTGTGAAGGCTGGCCGCCTCTTTTTTTTTTTTTTTTTTTCTCTTTTAAGTAAAA…
Isoform_20419	ACTCAACCCTTGATTCATCTTCATTACCATTCTCTATACATAATTGGGAACCAGAAGGTGGGTTCCCAATGAGGATTCGTCCTGTTTGTCCCGGAACACTTCTGGGTTTCTGGGTATGTTTAGTTCTGCTATTCTCTGTGGGCTTTTGCCATGCAGATGACAAATCAGTTGAGGTAGTTGGTTTTGGAGAATGTGCTGATTGTTCCCAGAGTAAATTTAAGGCTAGCCAAGCTTTTTCAGGACTACGCATAACAATTGATTGCAAGTCCAAAAATGGACACTTTCAAACAAGAGGTACTGGAGAGCTGGATAAACAAGGAAAGTTCAAAGTATCTCTCCCTCAAGAGTTGGTTCAAGAGGGTAAACTAAAAGAGGAATGCTTTGCACAGCTTCACAGTG…
Isoform_2046	ttttTTTTTTTTTTTTTTTTTTTTTGGTTCTTGGAACCCCATCTTTTGATATTTTTTTTGTTTGGTATACATTGTTTTGTTCTTGGAACCCTCGACCACAACAGTTTATATCATTGGTTTCACTGTTGCCTATTATTTTACAGATCTTTTGATATTTTTTTTTGTTTGGTATACATTGTTATTTGCCATATAATCTGTTTTATTTGTGGTATCTTTTTTTGATGATGAATTCTGAAAAGGAAAAGAAGGTGGTTTCAAGGAAAAGAAAGGGCCTCCAGCCAAGGGACCGAAGAAAGGCTGTATGCAAGGAAAAGGTGGGCCCGAAAATGGGAAATCTAATTTTAGGGGTGTTATTGGGTTGCTGAAATTCGGGGAACCAGCTGGATGGGGTACTTAAAA…
Isoform_20592	TATTTGAAGAATCAAATCAAATACCATGGTCTAATAATAATGAACCTTTCTGATTAGTTGATAATATTAGTTAAGAACTTTGTTAAAGATAGCTGTGAAAGGTTTCATTAAGGACTAATTTGTGTCGAGTAGACTTTGTTTTGTTGTTGTGAGAATTCTTAAATTCAAAAAATAATTGTAAGGGAGGTACTTATGTCACCACAAACAGAGACTAAAGCAAGTGTTGGATTCAAGGCCGGTGTTAAAGATTACAAATTGACTTATTATACTCCTGACTATAAAACCAAGGATACTGATATCTTGGCAGCATTCCGAGTAACTCCTCAACCCGGAGTTCCACCGGAGGAAGCGGGGGCCGCGGTAGCTGCCGAATCTTCTACGGGTACTTGGACAACTGTG…
Isoform_20596	TTTTTTTTTTTTTTTTTTTTTTTTTTGCCAGGAATCATAATACTTGAGGATTGGGTTTGTGGCACAAGAGGATGTGCTGTTCCCACAATTAACAGTGGAAGAAACATTAATTTTTGCTGCATTTCTAAGACTTCCAAGCAGCATGAACAGAAAACAAAAATACACCAGAGTAGAGATGATTGTAAAGGAATTAGGCCTTGAAAGATGTCGTCACACGAGAATAGGAGGAGGATTTATCAAAGGGGTATCAGGAGGAGAAAGAAAAAGAACCAGTATAGGTTATGAAATTCTAGTCGATCCTTCATTGCTGTTGCTTGATGAACCAACTTCTGGCCTGGATTCCACCTCTGCAAATAAACTTCTTCAGATTCTTCAAGGAGTTGCTAAGGCAGGAAGGAC…
Isoform_20656	CACATTTCTCCTCTGTTCATTTCCTCTCCAAAATGGGTTTCTACAAATTCTCTTCATCCATGGCGATCTTCCTCTTCTTCCTCCTCTTCATCTCCTCATCAGCTCTAGACATGTCGATCATCAAATACTCCGAGAATCACGGAGATAAATCAAGCTGGAGGTCCGATGAAGAAGCGATGACTTTATACGAGTCATGGCTTGTAAAACACGGCAAGTCGTACAACGGGTTGGGCGAGAAGGATCGGAGGTTTCAGATCTTTAAGGATAACCTTAAGTTCATCGACGACCACAACGCCGAGAATCGGAGTTATAAACTTGGGTTGAACCGGTTTGCTGACCTCACCAACGATGAGTACCGGTCCATATATTTGGGACGAAGATGGATGTTAAGAGAAGGTG…
Isoform_20690	ACTCAACCCTTGATTCATCTTCATTACCATTCTCTATACATAATTGGGAACCAGAAGGTGGGTTCCCAATGAGGATTCGTCCTGTTTGTCCCGGAACACTTCTGGGTTTCTGGGTATGTTTAGTACTGCTATTCTCTGTGAGCTTTTGCCATGCAGATGACAAATCAGTTGAGGTAGTTGGTTTTGGAGAATGTGCTGATTGTTCCCAGAGTAAATTTAAGGCTAGCCAAGCTTTTTCAGGACTACGCATAACAATTGATTGCAAGTCTAAAAATGGACACTTTCAAACAAGAGGTACTGGAGAGCTGGATAAACAAGGAAAGTTCAAAGTATCTCTCCCTCAAGAGTTGGTTCAAGAGGGTAAACTAAAAGAGGAATGCTTTGCACAGCTTCACAGTG…
Isoform_20722	CACTCAACCCTTGATTCATCTTCATTACCATTCTCTATACATAATTGGGAACCAGAAGGTGGGTTCCCAATGAGGATTCGTCCTGTTTGTCCCGGAACACTTCTGGGTTTCTGGGTATGTTTAGTACTGCTATTCTCTGTGAGCTTTTGCCAAGCTTTTTCAGGACTACGCATAACAATTGATTGCAAGTCTAAAAATGGACACTTTCAAACAAGAGGTACTGGAGAGCTGGATAAACAAGGAAAGTTCAAAGTATCTCTCCCTCAAGAGTTGGTTCAAGAGGGTAAACTAAAAGAGGAATGCTTTGCACAGCTTCACAGTGCATCAGCCACACCATGCCCTGCCCACAATGGGCTGGAGGCATCAAAGTTGGTCTTGAAATCCAAAACAGCTAGCAAA…
Isoform_20728	CAGATTTCCTTTTTAAAAGATAAAGCCAAGTGCATCGGGTGTGATCATCAATAAATGTGACATAATATCTGTGACCGGACAAATCAGTAGTGGGAGAGGGACTCCAAACATCAGAATGAATAAGATTAAATGGAGCAGGTGCTCGATGCATGCGAGAAATATAACTAGTTCGAACATGCTTAGACAATTCACAAACAACACATTTAAATTTATGAAATTTGCAAGCTTTTATTAAATCTGGAAAAAGTAAACACTGATATTGAAAGTTAACATGTTCAACTCGAGCATGCCACACTTCAAGATTATTTAAAGAAAAAACATAAGAACTCGAAGCGGGTAACACAGAAGCTTGCAAACTGGAACTAGGTGGAGGGTCCCCAAAGTAGTACAGCCCATCGC…
Isoform_20912	CTGTTGCCCGTTTTGCCAAATGGCGTGCTGTCCTCAAGATTGGCCCCAATGAGCCATCTCAGCTTGCTATTAATGAGAACGCTAATGGCTTGGCTCGTTATGCCATCATCTGTCAAGAAAATGGCCTTGTACCCATTGTTGAGCCTGAGATCCTTGTCGATGGCCCCCATGACATTGATCGTTGTGCTGATGTGACCGAGCGCGTCCTTGCTGCCTGCTACAAGGCACTTAATGACCACCACGTCCTTCTTGAGGGAACTCTATTGAAGCCCAACATGGTCACTCCAGGATCAGATGCAAAGAAGGTTTCACCTGATGTCATTGCTGAGTACACTGTTCGTGCCCTTCAGCGTACCATGCCCGCTGCTGTCCCTGCTGTTGTGTTTTTATCTGGTGGCC…
Isoform_20945	AGTAAATTTAAGGCTAGCCAAGCTTTTTCAGGACTACGCATAACAATTGATTGCAAGTCTAAAATGGACACTTTCAAACAAGAGGTACTGGAGAGCTGGATAAACAAGGAAAGTTCAAAGTATCTCTCCCTCAAGAGTTGGTTCAAGAGGGTAAACTAAAAGAGGAATGCTTTGCACAGCTTCACAGTGCATCAGCCACACCATGCCCTGCCCACAATGGGCTGGAGGCATCAAAGTTGGTCTTGAAATCCAAAACAGCTAGCAAACACACATTTGGACTGCCCGGGAAGCTAAAATTCTCGCCAGCAACGTGCACTTCAGCCTTCTTATGGCCTCACTTTAAGTACCCGCCGCTACCCAAATTCCCACCCTTGCCCACAGGTCACCCATGGCTTAAGC…
Isoform_2114	AGAGGGAGGCGGGTTTGGAAATAACAGAAGAAATTGTGAAAGGTTAGAAAGAGATAGGGACTAGAGAGAGAAGAGAGAGAGAGTGATGGAGAAGAGGGAAGGCACTTTATTACCTTTTTCAATGATGCACGCATCCGTGGCAGAACAGAGAAGTAGTACACAAATAGGGTAAAAGAGAAGAGAACGCAAACAGGGAGGTCTAGGAGAGAGAGAGAGAGCAGAGGAGATGGAGCTCCAATGGTGTTGCAGACAGAAATAAACATGGAGCTCAAAAGGAAGAGAAAAAAGCTGGGGGTGTCTGAGGTACAAAGAGTAGTAGCTGTTCTTGTTTTGAAAGGTTGGGTCTCGTCCTTTCTTGAGTTTGAGATGAGATTCACGCTCTTCAAATCTAAGAAGTAA…
Isoform_21259	ACTTAACACAATTGTTAGCAGCATGATTTATGATATTGCTGTGCTTTGGTTCTGTTGAACAGAGTATCTAATTGCGGCTTATGACGAGGGTAAGTCCTGAATTTGAAGATAAGATGCAGGTGGAGGTAGTTATGCCGGTTTCAGCTGACGTGAGCTTTGCATCTAACCATTTTCCAAAGTACAAAATAGGACCTAATAATCAGATTCTGGAGGAAGCCAAAGAAGATGCTAAGGGTCCATCACTGAAGGAGGTTGTTACTCAGGAAACTACCCAACTGTTAGAGCAGCAAAAGCGTCTCTCAGTTCGTGACCTTGCCACTAAATTTGACAAGAACTTGACGGCCGCTGCTAAACTGTCTGATCAGGCAAGACTTAGAGAAGTGGCTTCTTTAGAAGGAC…
Isoform_21265	TCCTCTCCTCTCCTCTCCCTCATAACTAATGCCTTTCTTCTCCTCTCCTCTCCCTCATAACTAATGAATCCTCTACTCTCCTTTCCTTAAAAACTCGGTAACAGAGCGTTAGGGGCTTACGAGAACTTTGGCTTTTTTTTTTTTCTCCGATTGAAAGAAGTCTGTACTCATTCGGTCATTCCCTTCTTCCCCGTGTTCGGTGTTTCCTCTCCTCCACTCTCTTTGTTCTTTGCAAAACGAAAACGGAACACTGGAATAGACACTGAGACAAGTGACAACAGAGCAACGACGGACGGCCATTGACGGGAAGAGGCGGCATCACGACGACTCGGCGAGCGAAGCACACAGGGCTCGGCGGCCAAAGGGATCCGAAAGGGAAAGCCTCGAGCATATGAAATG…
Isoform_21270	aGTCATCCCTTCTCCATTTCTTCCGATTTTCACTTTCATTTCGACAGAACTGCTCCTCAAAGCCGTTTTATCATGACCTCGAAACTTTTCTCGATCCTCACTCGTTTGAGTTCAACCTCGTCCATGCAACCAACTCATCGGCTCTTCAAATTGCTAATTCGAACTCCCATTACTACTAGATCATATCACACAGGTCAGGAGGCTAAAGTTACCCTGTATTCGAAGATCAGTCCGTTAGGAAACCCTGAGATAAGCGTTGTTCCCGAGCTCGATGATTGGGTCCAAAAGGGCAAAGTAGGTTGGTGTTAGTGAGTTGAAGCGTCTCGTTTACAATCTTCGCAAGCGCAAGCGGTTCACTCAAGCTCTCGAGATTTCTGAATGGATGAACAAAAGAGACAT…
Isoform_21420	GTATCGCAAAAACCCTACCCAGTCCTCGTTTTTGTGAAACAGCCATGGTGGCCGCTTTCGAGCTAGAAGTTCACTTCAATCCAGATGGATGGGGACCGATTTCTACTCTTCCAAACCACCCTACGAACGTCCCCTTTGCACCCTTCTCCCGTTCTGACAAAGTCGGCCGCATAGCCGATTGGAATCGCAACTACAATCAGAACTCCCGTAACAAAAATCCCGCTGATTCGGCCTTTGACTTCACAGGTGACGACTCTTTCGGTGGCGGCGCTGGCGACGAAGATCAAACTTTTCGCCTTGTCGACGGCAAGCCTCCTCCTCGTCCTAAATTCGGTCCCAAGTGGCGATTCCAGCAACAGAAACAACTTCCACAGCGACGTGACGAAGAGGTTGAAGCCC…
Isoform_21482	ATAATAAGCAAGAAATAAACCCGGTCCAGAATAAATAACAAGAACACGGACTTCCTTTTAGCGACTAAAAACTCACAGACGATCCATGATAGAGCAATCAAAATAAATTGGGGCCAAAGTAATATATAACCATCCGCGGACCTGCACCATACTCTTATCAAACTGTGGGCCCGGTACCTGTAACTGACCCTTTGTTCCAATCCACTCCCAAAGTTTCTCGAAGAACTTATTGCGAGTTTGCGACCTCATAACAGTCCAGTCTGGATTAAAAACATCATCACATGCTGTGGCTGCTTATGCATTATCTTACAAAGATCCTTAAAGTTGTTTAAAATAAGTCTTCTTTGGAGACCAAAAAGAGGCGAAGATCACGAAGTGGTGAAGATAAAGTTGTGGAGA…
Isoform_21513	CAAACTGGAACTAGGTGGAGATAAGGTGGAGGGTCCCCAAAGTAGTAAAGCCCATCGCGCTCATGGCCCATACCAAAAATCCTCTTCGAACTCAGGTCCTGTAAAAAACAAGCAGAAGCCAAAAAGATTACTGCACAGTTTAAGGACTTAGCAAGACGACTGACAGAAAGTAAATTAAAGGCAAGATGTGGGACATGACAAACATTACGGAGTGTAATATCAGGATTAAGACAAACATCACCCTTGCTAAGAATAGTAGTAAAGGAACCATCAGCTAAACAGACTGAACTGATTAACGGACTGACATTAGAGGTAAATACTGAAGACTCACCAGTCATATGATCATTTGCCCCGGAGTCCAAGATCCATGAGACGGGACTCCGGTGCGAGAGGAGAGCA…
Isoform_21546	ACTCAACCCTTGATTCATCTTCATTACCATTCTCTATACATAATTGGGAACCAGAAGGTGGGTTCCCAATGAGGATTCGTCCTGTTTGTCCCGGAACACTTCTGGGTTTCTGGGTATGTTTAGTACTGCTATTCTCTGTGAGCTTTTGCCATGCAGATGACAAATCAGTTGAGGTAGTTGGTTTTGGAGAATGTGCTGATTGTTCCCAGAGTAAATTTAAGGCTAGCCAAGCTTTTTCAGGACTACGCATAACAATTGATTGCAAGTCTAAAAATGGACACTTTCAAACAAGAGGTACTGGAGAGCTGGATAAACAAGGAAAGTTCAAAGTATCTCTCCCTCAAGAGTTGGTTCAAGAGGGTAAACTAAAAGAGGAATGCTTTGCACAGCTTCACAGTG…
Isoform_21603	ACACTCACTAGTTGTCTCTCTCTCTCTCTCTCTCTCTCTCTCTCTCTGATAGGCACAAAAGAATACAATAGTTAGGGAACAGAAAACGAGCAAAACAGAGATGGTTGCAGCAGAAAAAACACAAAAGTTGCCCACAATTGCAGAGGTGGCGGAGGAGTTGAAGAGGATGACAGACATAGGGTTCCCAATTTTGGTCATGACCTTGATGGGTTATGTCAAAAACATGATCTTAGTTGTGTGCATGGGAAAATTAGGGAGCCTTGAACTAGCTGGTGGTGCTTTGGCCATTGGTTTCACCAACATAACAGGCTACTCTGTTCTCTCCGGTCTTGCCATGGGAATGGAACCCCTTTGTAGCCAAGCTTTCGGTTCGCGAAATTTATCTCTTACTTGCTTAAT…
Isoform_21622	ATTCTTTCCTAATTATTATCATTGATTATGCGTACCTTTGGCCTTTATAAGGCCACACCCCTTTCCCCTTCAGAGTCCACATTTCTCCTCTGTTCATTTCCTCTCCAAAATGGGTTTCTACAAATTCTCTTCATCCATGGCGATCTTCCTCTTCTTCCTCCTCTTCATCTCCTCATCAGCTCTAGACATGTCGATCATCAAATACTCCGAGAATCACGGAGATAAATCAAGCTGGAGGTCCGATGAAGAAGCGATGACTTTATACGAGTCATGGCTTGTAAAACACGGCAAGTCGTACAACGGGTTGGGCGAGAAGGATCGGAGGTTTCAGATCTTTAAGGATAACCTTAAGTTCATCGACGACCACAACGCCGAGAATCGGAGTTATAAACTTGGGTT…
Isoform_21671	AACACGCTCTCTCTCTCTAACAATTTACAATCCCCATTTTTCTTGAGCTGAACCGTGAGCCAGATGGCTTTACTCCTCTCTACTCCTTCTGCTACATGTATTACAGTAGCATCAACCAACGCTCCTCTCAAAACCCTTCCCCTTTTCTCTACTAAATCCCTAAACCTAAATCTCCCCTCAAGAAGAAGTAAAAATTTCTCTCCTTTACAAGTTGCTTCTCCTTCAACCCAACCATCGACAACTTCTGAACAACAAGACCAATTGACTTCAGAGACGTCGCCGCTTGATAAAAATCAAGATTATGAATACGGAGTTGAATTTGATGATGATGGTGAGAGTTCGTCATCCAAGTTCGCTTGGAGAGATCATTGGTACCCGGTGTCTTTAATTGAAGACTTG…
Isoform_21781	GATGTTCCTGCGGGAAAGGCTATGCTAGGGCGTGTGGTCGACGCGTTGGGAGTACCTATTGATGGAAGAGGGGCTCTAAGCGATCACGAACGAAGACGTGTCGAAGTGAAAGCCCCTGGGATTATTGAACGTAAATCTGTGCACGAGCCTATGCAAACAGGATTAAAAGCGGTAGATAGCCTCGTTCCTATAGGCCGTGGTCAACGAGAACTTATAATCGGGGACCGACAAACTGGAAAAACAGCTATTGCTATCGATACCATATTAAACCAAAAGCAAATGAACTCAAGGGCCACCTCTGAGAGTGAGACATTGTATTGTGTCTATGTAGCGATTGGACAGAAACGCTCAACTGTGGCACAATTAGTTCAAATTCTTTCAGAAGCGAATGCTTTGGAA…
Isoform_21808	CCACATTTCTCCTCTGTTCATTTCCTCTCCAAAATGGGTTTCTACAAATTCTCTTCATCCATGGCGATCTTCCTCTTCTTCCTCCTCTTCATCTCCTCATCAGCTCTAGACATGTCGATCATCAAATACTCCGAGAATCACGGAGATAAATCAAGCTGGAGGTCCGATGAAGAAGCGATGACTTTATACGAGTCATGGCTTGTAAAACACGGCAAGTCGTACAACGGGTTGGGCGAGAAGGATCGGAGGTTTCAGATCTTTAAGGATAACCTTAAGTTCATCGACGACCACAACGCCGAGAATCGGAGTTATAAACTTGGGTTGAACCGGTTTGCTGACCTCACCAACGATGAGTACCGGTCCATATATTTGGGGACGAAGATGGATGTTAAGAGAAGG…
Isoform_22092	AATCCGGGGCCGGATAAACGAAATCCGGGGGATCCTCTTTACACATCCCACTAGGGCGCTCCTTCTATCGGAGCCAACCCTTTTACGCTATTTAAATGAGATCGAAACGAATGGAACGCGGCAGAGCGCTCCCTATATGCGGGTAGTACGCGCCATTCGTAATTCGAATCTGATTCTTTAGTCTTTCTTAGCAGTATCTATTAGCAGCGGAATTCTCCCTTGACTCGATCTTTCATTTCATTATGGAATTTTCTCCCAGAGCTGCGGAACTAACGACTCTATTAGAAAGTAGAATTACCAACTTTTACACGAATTTTCAAGTGGATGAGATCGGTCGAGTGGTCTCAGTTGGAGATGGGATTGCACGTGTTTATGGATTGAACGAGATTCAAGCTGGGG…
Isoform_22212	TCACTCAACCCTTGATTCATCTTCATTACCATTCTCTATACATAATTGGGAACCAGAAGGTGGGTTCCCAATGAGGATTCGTCCTGTTTGTCCCGGAACACTTCTGGGTTTCTGGGTATGTTTAGTACTGCTATTCTCTGTGAGCTTTTGCCATGCAGATGACAAATCAGTTGAGGTAGTTGGTTTTGGAGAATGTGCTGATTGTTCCCAGAGTAAATTTAAGGCTAGCCAAGCTTTTTCAGGACTACGCATAACAATTGATTGCAAGTCTAAAAATGGACACTTTCAAACAAGAGGTACTGGAGAGCTGGATAAACAAGGAAAGTTCAAAGTATCTCTCCCTCAAGAGTTGGTTCAAGAGGGTAAACTAAAAGAGGAATGCTTTGCACAGCTTCACAG…
Isoform_22310	ATCCCTCGGTGCTAGAAAAGATCAAGCAAATGTCTCTGCTATCGTTTCTGCAACAAGTATGGGGAGACCTGCAAAGAATAACAAACTTTAATTTCTTTATCCTCTCATTTATTTTCCTCTTCACTCTTCTCCTTTTGTTCAAGTTTTCTCCCAGCGGTGGCAAAGGAAAACTAAACTTACCTCCATCACCACCAAAGCTACCATTAATTGGCAATCTTCACCAGCTAGGCCAGCTCCCTCATCGATCCCTTCGAGCCCTCTCTGAAAAATATGGCCCCCTTATGCTTCTACAACTGGGCAAGGCTCCCACTCTCGTGGTTTCATCTCCACAATTTGCTAGAGAAATCATGAAGACCCATGACACTGTTTTTGCAAACAGAGTCCGAATACAGGCTGCTG…
Isoform_2234	GAGAGGATTGAGGCACTTTTACTGCTTTTTTATGTTGCACGCATCCACAGGCAGAATACATGGGAAGGAAGACAAGGGTACTCTTACAAAGGACACAGCCAAGAGAGAAGTGAGGATTGCGCATATGGGGTTGAAGAAATATCACCACAAAACAGAAACAGTGTGAGTGATTTCATTCATTGGAGACAGAACAAGAAGCGGTGTCCTCTGTAATGGGTTTTGCATGCATTTTCTCGAAGGGCAAAGCTCAGACATATTAAATCTGCTTTGAATGATTTTGTTTTATTCATTAATAGCTCTTGTTCAATTAATTGCTTACAACTTTTTTGAAGTAAACTCCACTTGTTTTTATTGTGCTTCATATTTTGTACATATCTGGGTATATTGAAAGCTGGGGAG…
Isoform_2244	ACTCTTCAATCGAAATAATATACACACAAAAATACAATCTCATATCAGTTTGTTAACACTCTGCTCTACTCCTCGCATCAGATCCTCTCAATTTTTCTTTTGTCGGAAGTAATCCATTTTTATATTTTTCGAGACTCGCTTTTCCGTTGTCTCAAAAACCCAGCTCTGATAAACTTTTCAATCTCATCGCTTATATGTGATGAAAATTAGCCTTTAAATTTAAGGCATCAAGATGCTTCCATGGGGTGGACTGAGCTGCTGTTTGAGTGCGGCTGCTCTTTATGTCCTGGGAAGGAGCAGTGGAAGGGATGCGGAGTTGCTTAAATCCGTAACTCGCGTAAATCATTTGAAGGATTTAGCACAATTACTAGATACAGCATGCAAAGTTTTACCTATGGT…
Isoform_2262	CAAGAAATGGTGTACCAAAGATCTGCACGGGATCACCCGAATCGTTTGTAGAACTTGTGCAGGAAAAAGTTGATAATCCATTGGACTTCTCTAGAGTCCTGAAAGCAGCTCTTAACACCCGAGGAACTGACGTACAGAAGTCCAACGCGTCTCATCTGATTGTCACAATACATATATATTATAACAATTTGATTACTGGGGAAAACTTGTATAGCAAGCTTTCTCTTGTTGACTTGGCTGGAAGTGAAGGTTTAAATGTGGAAGATGGCAGTGGGGAGCGTGTAAAGGAATTGCTGCATGTCATGAAATCACTTTCAGCGTTGGGAGATGTTTTGTCTTCTTTGACTTCCAAGAAGGATGTCGTTCCTTATGAAAATTCCCTGCTTACAAAAGTACTTG…
Isoform_22693	TCCTCAGGAAATTTCCTCAGGTCTCCATCGATGTGGTTGGATTGGTTGACGAGTGGGCTGCTCGTTTTTTTGAGGAGTTAGATTATGTTAATGAGGGTGAGAATGGGACACTATTTGCTGAAATGATGAGGAAAGACCTTCCACAGGTTGTTGTACCAAAGACCTATCAGAAATATACTTCAAGAAAGGTTCTTACTACATCATGGTTAGAAGGAGAAAAGCTGTCACAAAGTAAAGAAAGTGATGTTGGAGAGCTGGTCAATGTTGGAGTCATATGCTACCTAAAACAGTTGCTTGATACTGGATTTTTTCATGCTGATCCGCATCCTGGGAACATGATTCGCACTCCAGATGGGAAGTTAGCTATACTGGATTTCGGCTTAGTCACAAAATTAACTG…
Isoform_228	TTTTTTTTTTTTTTTTTTTTTTTTTTTTTTGTCTGAATATCCAGGAGCTAAGACCATTCCAATGCCCCCTTTCGCCATGCATAAACTGAACCAACAATTAAGATAAGCACGAAAATGAAAGCTTCTATAAATACGGATACACCCAATACATCAAAACTCATTGCCCAGGGATAAAGAAAAACCGTTTCAACATCAAAAACAACAAAAACTAAAGCAAACATATAATAACGGATTCGAAATTGTAACCAAGCCTCGCCCATCGGTTCTATGCCCGATTCATAACTAGAAAGTTTCTCTGGTCCTTTGCTAATCGGAGCTAAAACTCCGGAAATTAGAAATGCCAAAATAGGAATAATGCTTGATATTAGTAGAAATGCCCAAAAAATATCATATTCATAA…
Isoform_230	CTTTTTTTTTTTTTTTTTTTTTTTTTTTTTTGAAGGAAACAGGGCCAAAACCTCCCTGGGCTCTAACAGAGCACTTCAAATTCAATTCAACTTATCAAAAACTGCATAACGAATACAACATGAAAGAATCTATACTAAGGTAACTGAGGACCCTATACAATGATCACTATTGGATCTAAAACATAAAAGATGTCATCTGGGGCCATCCAAGAGTAACTACTAAGAAGAATGTTCAAAGCAGAAAATTCAGACAAATGTAACCCAGGTTTGATTATTCACCACTTCCCAACACTCAACCCTGCATCTTTATCAGGCTTTAACCTCATCCTGGAATCATAAAGCACAAGATTGGGACCAAAAAGGACATCCTAGTCCTATTATGCCACTGTAAAGCTTCTG…
Isoform_2304	TTTTTTTTTTTTTTTTTTTTTTTTTCTTCCACTCAGCTTGCATTGAACTCTTCACATTCACATGCTTCATTAAACTATGCTTGTATGGAGGTGGAATATTGAGTAGTGATTCTATTCCGATAAAATCTATATATGCATGTTTCTGTGGAGAATTGCCTTGCTGCTCCAAATTCTTTGCCCTTTCTTCCGGTGAACCTCTCATGTGCATTGACTTGGTCGGCTCCTGGCTATGAATGTTCTTTAAAGCTTGATGGTCACTGTAAATTACGAACTCCCCGTGCATCAGATAGTGCTTCCAAATCTTCTGAGCTTTGAAAATAGCATAAAATTCCATATCATAGGTAGTCCATTTCAATCTAGCTTCCCCAAGCATTTCACTAATAAGCTCAACTAGACGTC…
Isoform_2327	TTTTTTTTTTTTTTTTTTTTTTTTTTTTTAGTAAATTAAAGCGCTTTCTTTTAAGAATGCATCTAGTTCCATCTTTCTTTCGTTAGTTAACCCACCTTTTTCTAAAAGGGATTGTAGTAATTCTGGTTTTATACTACTTAGAATGGCTCTCTCATATTGAGAAATTCTGTCTAGTGGCATTCGATCACAGAATCCCTTGACAGCTGCATAAATGACTAGAATTTGTTTTTCAATTGGAAGTGGTGCATATTGTGGTTGTTTCAGTACTTCTGTAAGCCTTGCACCTCTATTAAGTAATGCCTGAGTCGCAGCATCAAGGTCTGACCCAAATTGAGCAAAGGCGGCCACTTCGCGATATTGCGCCAATTCCAGTTTTAAACTACCGCAGACTTGTTTCAT…
Isoform_23353	GAAATGAGTTTTCTTCTGCACTTGTTTGTGCCTACATAGAAAAACTCACCATCTCTCTCTCTCGTTGATAGAGATGATATAGTTCCAAAACGAAATTACAGAGGGGAGGAGAAAATCCAAATCAGTTCTTTTTTTTTTTTTTTAAATTAATTTTCAGTCTGACTTTTGGATTTGGTGGTGTTATTGGGCTATGGAATCTGGAGAGTTCGACGACAGGGTTTTTTGGGAATCATCATCATCATCATCATCAGTAGCAGCAGGTCTTGCAGAGGTAACAGGTTTCAGAGTACAAGTGACAGCTGCAGATGAACAACAACAGCAAGCAAAGCAAAGCGTCCGTATCACCAACTACAGCCATTAAAGAGTGAAAAACCAATAAAAAATCAGAAACTCATCAGC…
Isoform_2339	GGTATTAAACCATTGAAGTCACTGCATTTTGCAGAGTATCTATGGGGAAAGCTGTTGTATACACAACAAATCATTTACAAAGAATTCTACTTTTAGAGAATCGGTTCTAGATCCGAGAAAAATTCCATTTTTGGATCCATAATTTTCAAAAATCTCAAACCAAATCTCTCTACTTGCTCGATCCGGTTCTGGGTCGAGGTTGAAATTAAACCAACCCGAACGGAACTGGAATCATAAGGCACCCGATTGTTGGAAATCAGATCATAATACGATTGAGTCTCTGCAAGTGGTTTTTCTATAATTCTCAACCAGCTCTACGGCGTGATCTCCGATCAGATATTCTTTTGGTGAGATAATGAATTTTCTGCTACGATCTACTCAAACTGTTATACCGGATCA…
Isoform_23484	AATTCACTCAACCCTTGATTCATCTTCATTACCATTCTCTATACATAATTGGGAACCAGAAGGTGGGTTCCCAATGAGGATTCGTCCTGTTTGTCCCGGAACACTTCTGGGTTTCTGGGTATGTTTAGTACTGCTATTCTCTGTGAGCTTTTGCCATGCAGATGACAAATCAGTTGAGGTAGTTGGTTTTGGAGAATGTGCTGATTGTTCCCAGAGTAAATTTAAGGCTAGCCAAGCTTTTTCAGGACTACGCATAACAATTGATTGCAAGTCTAAAAATGGACACTTTCAAACAAGAGGTACTGGAGAGCTGGATAAACAAGGAAAGTTCAAAGTATCTCTCCCTCAAGAGTTGGTTCAAGAGGGTAAACTAAAAGAGGAATGCTTTGCACAGCTTCA…
Isoform_23496	ATGGAAAAGGAACTCTTCAGATATCCTATAAATATACAATAATGTTATAGTCGCATCGTTTCGTCCAAAATTGAAGAGAGCAATGACTTCCCGAGATGAGAAACCATCAAAGCCCTCGAGCAGTCGCACCGGTGGTATACGCACACTATCCGATTTGAATCGCCCTTCCGGTCACGATGACAATGACCCAGATGCCCCTCAGGAGTATTATACTGGTGGAGAGAAGAGTGGAATGCTTGTCCAAGGTCCTACAAAAGGTAATGATGTTGATGCAATTTTCAACGAAGCTAGGCAGTTGGGAGCTGTTGATTATCCTCCAGACAATCTGCGTCCACCCTCAACTTCAACAAGCTTTACCGGAACAGGAAGATTACTCTCTGGAGATACAGCTCCCTCTGT…
Isoform_23507	ACTCAACCCTTGATTCATCTTCATTACCATTCTCTATACATAATTGGGAACCAGAAGGTGGGTTCCCAATGAGGATTCGTCCTGTTTGTCCCGGAACACTTCTGGGTTTCTGGGTATGTTTAGTACTGCTATTCTCTGTGAGCTTTTGCCATGCAGATGACAAATCAGTTGAGGTAGTTGGTTTTGGAGAATGTGCTGATTGTTCCCAGAGTAAATTTAAGGCTAGCCAAGCTTTTTCAGGACTACGCATAACAATTGATTGCAAGTCTAAAAATGGACACTTTCAAACAAGAGGTACTGGAGAGCTGGATAAACAAGGAAAGTTCAAAGTATCTCTCCCTCAAGAGTTGGTTCAAGAGGGTAAACTAAAAGAGGAATGCTTTGCACAGCTTCACAGTG…
Isoform_23551	ACATTTCTCCTCTGTTCATTTCCTCTCCAAAATGGGTTTCTACAAATTCTCTTCATCCATGGCGATCTTCCTCTTCTTCCTCCTCTTCATCTCCTCATCAGCTCTAGACATGTCGATCATCAAATACTCCGAGAATCACGGAGATAAATCAAGCTGGAGGTCCGATGAAGAAGCGATGACTTTATACGAGTCATGGCTTGTAAAACACGGCAAGTCGTACAACGGGTTGGGGGAGAAGGATCGGAGGTTTCAGATCTTTAAGGATAACCTTAAGTTCATCGACGACCACAACGCCGAGAATCGGAGTTATAAACTTGGGTTGAACCGGTTTGCTGACCTCACCAACGATGAGTACCGGTCCATATATTTGGGGACGAAGATGGATGTTAAGAGAAGGGT…
Isoform_23602	GCACAACTCTCTCTCTCTCTCTCTCCTTTGTTGTTCTCGGTGGGAAGGACTTCAGTAGAAGAACAAACCCTAAAACCCAGAACCTCTCTTCTCAAACTTCACTCGAAAAAAATAAAAAATAAAAAAAATCATTTCTCTCAGACCCCAAAGCCCCTCTATTTCCATAGCTTAGGGAGACTGGCAGAGAAACAAGACAAACCAAAAATGCCAAATAAAAAACCCATCTCACTCTTCTCCTACACTACCTTCTTCACTATCTTCTTCTTAACCAATGCGGGCCATGTGATCTCCAAATCAACAATTGAACCATGCTCCAACTCTGACTCCTGCAACGCCATGGTGGGTTACGCCCTCTACACCGACCTTAAAGTCTCCGAGGTCGCAACCCTTTTCCAAATC…
Isoform_23744	CTCGAGAAAATAAATAAATAAATAATAATGGCACAGCTGAAGCAGAGCTCCCACCTTGACAACATCCCATCGACGCCTGGAAAATTCAAGATGGAAAAGTCACCGTACGTTCACAGGCTCAGATGGCACTCTTCCCTTGCCAAGCTCACCTTTTGGGGCTTTGTATTCTTGGGTCTTATCTTGATTTTCTTCTTCCGATCGCCTTCCTCATCAACAATATCGTCCGATCCTTTCCGCCGATCGCTGAGGACGTCAAATTGGGGAGGTCCTGCTTGGGAGAAGCGAGTTCGGTCATCGGCAAGAGTCCGTTCTCGCAACGGCATCTCGGTGCTCGTCACTGGGGCCGGCGGGTTTGTCGGCACTCATGTCTCTGCAGCACTCAAGCGTCGCGGGGATGGC…
Isoform_23778	ACATTTCTCCTCTGTTCATTTCCTCTCCAAAATGGGTTTCTACAAATTCTCTTCATCCATGGCGATCTTCCTCTTCTTCCTCCTCTTCATCTCCTCATCAGCTCTAGACATGTCGATCATCAAATACTCCGAGAATCACGGAGATAAATCAAGCTGGAGGTCCGATGAAGAAGCGATGACTTTATACGAGTCATGGCTTGTAAAACACGGCAAGTCGTACAACGGGTTGGGGAGAAGGATCGGAGGTTTCAGATCTTTAAGGATAACCTTAAGTTCATCGACGACCACAACGCCGAGAATCGGAGTTATAAACTTGGGTTGAACCGGTTTGCTGACCTCACCAACGATGAGTACCGGTCCATATATTTGGGGACGAAGATGGATGTTAAGAGAAGGGTG…
Isoform_23913	caTAGAGTGGCCATATTAGACAAGGCTTGTGAGGAGGGTTGGATGGTGCCACGACCTCCACATTCGACGAAGAACAGGGAACAGAGTCGCTATTGTTGGAAGTGGACCATCTGGCTTGGCTGCTGCTGATCAGCTGAACAAAATGGGCCATTTTGTTACGGTCTTTGAGCGTGCCGATAGAATTGGAGGGCTTATGATGTATGGAGTTCCCAATATGAAGGCTGGCAAGCTGGATATTGTTCAACGACGGGTTAACCTTATGGCTGAGGAAGGCATCAATTTTGTGGTTATGCTAACTATTGAGTAGACCCCTTATACTCTGTTGATCGGCTTCGGGAGGAGAATGATGCCATTGTTTTGGCAGTAGGAGCAACAAAACCAAGGGACCTTCCCGTTCCA…
Isoform_23918	gacAAGTAAGTGGGAATCAAAATACCATGGGGAGGGTGTCTTTTTGAAAAATCCCATGGAATCTTGAGTTTAATTTTTTTTAATGGCAAAAGTGCCCATATCACATATGAAAGTCAACACAAAAATTACATACTTTGCCACCTCAAAAACCCTTCCCATCAAACAATGTTTTCAAATTCCCAGTAATATAAGAATCCCAGTAATCATAATCCAACAAAAATATTCCTGGTAATCATAATCCACCCAAAATCCTACTTCCTATCAAACGGGGCCTAAAGGGAATATTAAACCATGAATTTTAATTTTAATTATTAAGAACGATTTATCTAATAAGAATCATTAGTTTTAATTATTAAAAGATGTCCATTTTTTTTTAAATAAACATAATACCATTGGAAG…
Isoform_2392	TGGGCAGGGTTTGTTACCAGTGACATGGCAAATTGTATCATGGAGACTTGTGAACTTATCCGGCGATGGATGGGACTAGTGGGTTCTCTGTATCCTGACTATTTGGAATGAATGTAAAATGTTGCAGAATCAATGGATTGTGTCTCTAATGGAAGTAGGTATTTTCAGGCTTTGGTTGAAAATGAGATGTAGTGAGATTAAGGTGTCGGACGGGGAGAAGAAAGAAGTACAAAAAATTGGTAGTTTTTTTGGCTGTTTTTATCGTTGATTATGAAAACACGGACACATCTGTGGGTGGCTATAGAGTGAAGAGAACAAGGCAAGTTTGAGACTGTGTTGTAGAAAGTCTAGACCATGTAGTCGGTTGAAAAGGGCGATGGAACTTTGGAGGTTCTGATT…
Isoform_23990	ACTCAACCCTTGATTCATCTTCATTACCATTCTCTATACATAATTGGGAACCAGAAGGTGGGTTCCCAATGAGGATTCGTCCTGTTTGTCCCGGAACACTTCTGGGTTTCTGGGTATGTTTAGTACTGCTATTCTCTGTGAGCTTTTGCCATGCAGATGACAAATCAGTTGAGGTAGTTGGTTTTGGAGAATGTGCTGATTGTTCCCAGAGTAAATTTAAGGCTAGCCAAGCTTTTTCAGGACTACGCATAACAATTGATTGCAAGTCTAAAAATGGACACTTTCAAACAAGAGGTACTGGAGAGCTGGATAAACAAGGAAAGTTCAAAGTATCTCTCCCTCAAGAGTTGGTTCAAGAGGGTAAACTAAAAGAGGAATGCTTTGCACAGCTTCACAGTG…
Isoform_24023	ACTCAACCCTTGATTCATCTTCATTACCATTCTCTATACATAATTGGGAACCAGAAGGTGGGTTCCCAATGAGGATTCGTCCTGTTTGTCCCGGAACACTTCTGGGTTTCTGGGTATGTTTAGTACTGCTATTCTCTGTGAGCTTTTGCCATGCAGATGACAAATCAGTTGAGGTAGTTGGTTTTGGAGAATGTGCTGATTGTTCCCAGAGTAAATTTAAGGCTAGCCAAGCTTTTTCAGGACTACGCATAACAATTGATTGCAAGTCTAAAAATGGACACTTTCAAACAAGAGGTACTGGAGAGCTGGATAAACAAGGAAAGTTCAAAGTATCTCTCCCTCAAGAGTTGGTTCAAGAGGGTAAACTAAAAGAGGAATGCTTTGCACAGCTTCACAGTG…
Isoform_24201	AAGGTTGGTGGACGCAACAACGTGCTTGCTGATGCTATTAGCAGGAAAATTCCTCTTGTTAGTGACCGGCCGACAATCATCTTTGGAGCTGATGTGACCCACCCACCGCCGGGGGAAGATTCAAATCCTTCAATAGCGGCTGTGGTGGCTTCAGTCGATTGGCCGGAGGTGACTAAATATAAAGGCCATCTCCGTACTCAGCATCACCGACAAGAGATGATAGCTGATTTGTATACTGAAACTGTGGATGCTAAAGGGAACATGGTTGTAGGAGGAATGATACGGGATTCATTAATTGCTTACAGAAGGTCGACTGGACTGATCCCCTCGAGGATTATATTCTACAGGGATGGTGTTAGTGAAGGACAGTTCAGTCATGTTCTGCTTTATGAAATGGAT…
Isoform_245	AATCCCCATTTTTCTTGAGCTGAACCGTGAGCCAGATGGCTTTACTCCTCTCTACTCCTTCTGCTACATGTATTACAGTAGCATCAACCAACGCTCCTCTCAAAACCCTTCCCCTTTTCTCTACTAAATCCCTAAACCTAAATCTCCCCTCAAGAAGAAGTAAAAATTTCTCTCCTTTACAAGTTGCTTCTCCTTCAACCCAACCATCGACAACTTCTGAACAACAAGACCAATTGACTTCAGAGACGTCGCCGCTTGATAAAAATCAAGATTATGAATACGGAGTTGAATTTGATGATGATGGTGAGAGTTCGTCATCCAAGTTCGCTTGGAGAGATCATTGGTACCCGGTGTCTTTAATTGAAGACTTGGACCCTCTCCTCCCAACCCCATTTCAGC…
Isoform_24978	CGGAACTATAAGACCCAAATCTATCCTCTGTAGAATATAGGACCCAAAAGAGACTACCAGCATTCAGGCCCTCCAAGAAACCAGAAGATTCCGTTTATACAAAAAAAAAAAAGGTTAAAAGAAGAAGAAGAACAACCCCTTTTCTTTGCTTTCTTTATCTTCAACGGAAACACCAAGGATTATGCAACGCACATCTCTTTCTCAACCCTAACCCTAAAAGGAAATATCAGTCACATTTCTTTGATCGAAATCCCATTAGCGTTTCTCGAGAAAATAAATAAATAAATAATAATGGCACAGCTGAAGCAGAGCTCCCACCTTGACAACATCCCATCGACGCCTGGAAAATTCAAGATGGAAAAGTCACCGTACGTTCACAGGCTCAGATGGCACTCTTCC…
Isoform_251	TATTTGAATGTGATGCCATCCTAAATGAAGATCGTGATATCCACTATCCAGTAGTTGAAATGGCTAGTAGGTCAAAGCTAAGTAGTATATGTTGGAATAGTTACATCAAAAGCCAGATTGCTTCAAGTAACTTTGAAGGTGTAGTGCAGGTATGGGATGTTACGAGAAGTCAAATACTCAACGAAATGAGAGAGCATGAGAGGCGTGTATGGTCCATCGATTTCTCATCAGCAGATCCAACAATGTTGGCTAGCGGCGGTGACGATGGCTGCGTTAAGCTTTGGAGTATCAATCAGGGAGCAAGTGTTGGTACCATCAAAACAAAGGCCAATGTATGCTGTGTTCAGTTTCCCTTGGATTCTGGACGTTCTATTGCATTTGGTTCTGCAGATCATAGAG…
Isoform_25136	gAACAATCCCCATTTTTCTTGAGCTGAACCGTGAGCCAGATGGCTTTACTCCTCTCTACTCCTTCTGCTACATGTATTACAGTAGCATCAACCAACGCTCCTCTCAAAACCCTTCCCCTTTTCTCTACTAAATCCCTAAACCTAAATCTCCCCTCAAGAAGAAGTAAAATTTCTCTCCTTTACAAGTTGCTTCTCCTTCAACCCAACCATCGACAACTTCTGAACAACAAGACCAATTGACTTCAGAGACGTCGCCGCTTGATAAAAATCAAGATTATGAATACGGAGTTGAATTTGATGATGATGGTGAGAGTTCGTCATCCAAGTTCGCTTGGAGAGATCATTGGTACCCGGTGTCTTTAATTGAAGACTTGGACCCTCTCCTCCCAACCCCATTTC…
Isoform_25292	ACATTTCTCCTCTGTTCATTTCCTCTCCAAATGGGTTTCTACAAATTCTCTTCATCCATGGCGATCTTCCTCTTCTTCCTCCTCTTCATCTCCTCATCAGCTCTAGACATGTCGATCATCAAATACTCCGAGAATCACGGAGATAAATCAAGCTGGAGGTCCGATGAAGAAGCGATGACTTTATACGAGTCATGGCTTGTAAAACACGGCAAGTCGTACAACGGGTTGGGGGAGAGGATCGGAGGTTTCAGATCTTTAAGGATAACCTTAAGTTCATCGACGACCACAACGCCGAGAATCGGAGTTATAAACTTGGGTTGAACCGGTTTGCTGACCTCACCAACGATGATACCGGTCCATATTTGGGGACGAAGATGGATGTTAAGAGAAGGGTGTCGA…
Isoform_2530	GTGGGGAGAAGGAGAGAACAAAATTAAAAAATAAAAATCATGGTAGCGTCTATTCATGCTACAGTCATGCAGCCGACCAAGGTCGGCGGCTTGCCTGCTCGGACAGGAATGCAGCTAAAATTCTCTCAGTCTATGTGCAAGGCCTTTGGGTACGAACCAGCCAAAGCCAGACTCACTTGCTCACTCCAAGCTGATCTTAAGGATTTTGCTCAAAAGTTTGCTGATGCTTCTAAGATTGCTGGTTTTGCTCTTGCAACTTCTGCTCTTGTCGTTTCGGGAGCTGGTGCTGAAACAAAACGTCTTACTTATGACGAAATCCAAAGCAAAACATATATGGAAGTCAAGGGAACAGGAACAGCAAACCAATGCCCAACCATAGAGGGCGGCATACCAAAATTC…
Isoform_25433	ACTCAACCCTTGATTCATCTTCATTACCATTCTCTATACATAATTGGGAACCAGAAGGTGGGTTCCCAATGAGGATTCGTCCTGTTTGTCCCGGAACACTTCTGGGTTTCTGGGTATGTTTAGTTCTGCTATTCTCTGTGGGCTTTTGCCATGCAGATGACAAATCAGTTGAGGTAGTTGGTTTTGGAGAATGTGCTGATTGTTCCCAGAGTAAATTTAAGGCTAGCCAAGCTTTTTCAGGACTACGCATAACAATTGATTGCAAGTCCAAAAATGGACACTTTCAAACAAGAGGTACTGGAGAGCTGGATAAACAAGGAAAGTTCAAAGTATCTCTCCCTCAAGAGTTGGTTCAAGAGGGTAAACTAAAAGAGGAATGCTTTGCACAGCTTCACAGTG…
Isoform_25447	ATGCGTCGTTCTCTTCCTTGTAAAGTAAGACGAGTGAATCAATAGAAAAAATGCCTCGGGCTCTCCGTTGAGGAAAGTGAGGTTTGAGCATGGCGGTGGGTTAATCCAGTGTACAAGGAAGGCAATCTGTCGGATTAGACGAAGATTCTATAAATGGAAGGCGAGAAGGAAGCGGTTAAGGGTTAGATCGAGGAAGGGATCATGGTAGGGAACAGAGAGCACTCGACTGCGAGAGGAGTGGTGGAAGAAGCAACTTAGGCGAAGCGTGGATTCGAAGCAGATGACTGATTGGATTGGAAGAATTTCGCGAAGGATCTCGCACAGGTCACCCATGGCTTAAGCCATTTCCTAAAGTTTACCATCCACCTTTGAAGAACTTTGGTCATCCTATGTTCCCAT…
Isoform_25613	ATCTTCGTCTTCTCCAATTACTCGGTCTCTTTGATCTACCGTTTTCCACCTCTATCGGTTTGTTCGCTCAATCATTACTCGAAGCGTCTCCGTCTCCCTGTGTCTCGAATTCTTAACTTTCTTTAACTTCTCCTCTCTCATATGTTCCAACTCTCATAAGTCTCTCGATCCTTCCTATATTCTCATTATCCTCTCCCTCTCTTGAACGAAATAAAAGAATGATTCTTCTCTCAGTCTCTCCGCTCTCTGGACCCTCATGAAATAGAACGACGTAGAAGAATGGCATCAATCAAATATTCAGATCTACAGGATTTTTTTATTCTTCCATCTCTTCTCCCTCTTTGATCCCATTGTCGTGATTTACTCTTTAGCCACATGCAACCGCCGCGAACACATCGC…
Isoform_25728	AAGCAGTGGTATCAACGCAGAGTACATGGGAAGCAGTGGTATCAACGCAGAGTACTTTTTTTTTTTTTTTTTTTTTTAAATTAATTTTCAGTCTGACTTTTGGATTTGGTGGTGTTATTGGGCTATGGAATCTGGAGAGTTCGACGACAGGGTTTTTTGGGAATCATCATCATCATCATCATCAGTAGCAGCAGGTCTTGCAGAGGTAACAGGTTTCAGAGTACAAGTGACAGCTGCAGATGAACAACAACAGCAAGCAAAGCAAAGCGTCCGTATCACCAACTACAGCCATTAAAGAGTGAAAAACCAATAAAAAATCAGAAACTCATCAGCATTTTATCAACCCAAGAATAGAAAAAACAAACTACCATCATTATTCAGCTTCATAGCAAATACCCA…
Isoform_25973	GTAAACTAAAAGAGGAATGCTTTGCACAGCTTCACAGTGCATCAGCCACACCATGCCCTGCCCACAATGGGCTGGAGGCATCAAAGTTGGTCTTGAAATCCAAAACAGCTAGCAAACACACATTTGGACTGCCCGGGAAGCTAAAATTCTCGCCAGCAACGTGCACTTCAGCCTTCTTATGGCCTCACTTTAAGTACCCGCCGCTACCCAAATTCCCACCCTTGCCCACAGGTCACCCATGGCTTAAGCCATTTCCTAAAGTTTACCATCCACCTTTGAAGAACTTTGGTCATCCTATGTTCCCATTCCCTCCAATATATAAGAAGCCTTGCCCTCCAATACCAATCTATAAGGAGCCACTTCCACCACCGGTACCAATCTATAAGGAACCACTTCCAC…
Isoform_26083	ATCATCAAATACTCCGAGAATCACGGAGATAAATCAAGCTGGAGGTCCGATGAAGAAGCGATGACTTTATACGAGTCATGGCTTGTAAAACACGGCAAGTCGTACAACGGGTTGGGCGAGAAGGATCGGAGGTTTCAGATCTTTAAGGATAACCTTAAGTTCATCGACGACCACAACGCCGAGAATCGGAGTTATAAACTTGGGTTGAACCGGTTTGCTGACCTCACCAACGATGAGTACCGGTCCATATATTTGGGGACGAAGATGGATGTTAAGAGAAGGGTGTCGAGGACAAAGAGTGATCGGTATGCTCCGAGTGTCGGCGACAGCTTGCCGGATTCTGTTGATTGGAGGAAAGAAGGTGCCGTCGCTCCGGTCAAAGATCAAGGAAGTTGTGGA…
Isoform_2632	AGCTTCTGGGAGCTCGATCACTCTTCCCTCTTTCTCTATAAATATTTTCAGACTTATGTTTGAGCGCTTACGAGGGTTTGGCATGGTCTCTATAAATATTTTCAGACTTTGTTCATCAAGAACAAGTGTGGTTGGCATGAGTCTTAGCAATTTATGATTCAGATTTTGAGAGGCCAGTCCAATATTTTTTTGTAAAATTATTTGAAAGAGTGATTGTCATGTGTCTTTGATTTTGTTTTTCAAGGAAAAATCATTTTGGTTCAAAGACATTCCCTCATCATACAACTTAGAAAAGGAAGTATTTTCATGATCATTTGGAGTCCTCTAGATTTGGCGATTGAAAACTCATTTTGAGTTTGAAAGTATGATTTCTAATTTCTCATGAATTTAAATTTGAGA…
Isoform_2654	GACGGAAGGATGCTAATCAAAGGTGTCCTGGAGATGTAAATTATGATCCAAAAACTCTATACTTGCCTCCAGCTTTCTTGAAGGGTTTAACAGGTGGCCAGAGGCAATGGTGGGAGTTCAAGTCTAAGCATATGGACAAGGTTTTGTTTTTTAAGATGGGCAAATTTTATGAGCTTTTTGAAATGGATGCACACATTGGAGCAAAAGGACTTGATTTGCAGTATATGAAGGGAGACCAACCTCATTGTGGATTTCCAGAGAAGAATTTCTCAATGAATGTAGAGAAGCTGGCTAGAAAGGGTTATCGAGTTCTTGTTGTAGAGCAGACAGAAACACCTGAACAGCTTGAGCTTCGTCGCAAAGAGAAGGGTATTAAAGATAAGGTTGTGAAACGAGAAG…
Isoform_26546	TCTCACACACTCACTAGTTGTCTCTCTCTCTCTCTCTCTGATAGGCACAAAAGAATACAATAGTTAGGGAACAGAAAACGAGCAAAACAGAGATGGTTGCAGCAGAAAAAACACAAAAGTTGCCCACAATTGCAGAGGTGGCGGAGGAGTTGAAGAGGATGACAGACATAGGGTTCCCAATTTTGGTCATGACCTTGATGGGTTATGTCAAAAACATGATCTTAGTTGTGTGCATGGGAAAATTAGGGAGCCTTGAACTAGCTGGTGGTGCTTTGGCCATTGGTTTCACCAACATAACAGGCTACTCTGTTCTCTCCGGTCTTGCTATGGGAATGGAACCCCTTTGTAGCCAAGCTTTCGGTTCGCGAAATTTATCTCTTACTTGCCTAATTTTACAAA…
Isoform_26604	ACTCAACCCTTGATTCATCTTCATTACCATTCTCTATACATAATTGGGAACCAGAAGGTGGGTTCCCAATGAGGATTCGTCCTGTTTGTCCCGGAACACTTCTGGGTTTCTGGGTATGTTTAGTACTGCTATTCTCTGTGAGCTTTTGCCATGCAGATGACAAATCAGTTGAGGTAGTTGGTTTTGGAGAATGTGCTGATTGTTCCCAGAGTAAATTTAAGGCTAGCCAAGCTTTTTCAGGACTACGCATAACAATTGATTGCAAGTCTAAAAATGGACACTTTCAAACAAGAGGTACTGGAGAGCTGGATAAACAAGGAAAGTTCAAAGTATCTCTCCCTCAAGAGTTGGTTCAAGAGGGTAAACTAAAAGAGGAATGCTTTGCACAGCTTCACAGTG…
Isoform_26897	TAGACACAGGAGGTGTCACAGAAACCTGTACAGGGTTAGTACCAAAATAAGGAGTATCCTCAAAGAAAGTAACATCCATGGAGTAATAAGTATGACGAGTAACTGGATCATAACATCTATATCCTTTGGAAACAGATGAGTAGCCAAGAAAAATGCAACGAATGGCCTTGTCATCCAACTTGGTACGAGATGGACTCCTATTTTGGACAAAACAGGTGCACCCAAAGACCCGAGGTAAAATGGGAAAGAGAGTAGTCTCAGGATGAAGGACATGAAGCGGAGCCTTACCGGACAAGATCCGTGAAGGGGTCCGATTAATCAGATATGTAGCAGTAAGAACTGCCAAGTGCCAAAAAGACTTGGGAACATTCATACCTCGAAGGAGACACCGAACAACAC…
Isoform_26918	TATCGGAGCCAACCCTTTTACGCTATTTAAATGAGATCGAAACGAATGGAACGCGGCAGAGCGCTCCCTATATGCGGGTAGTACGCGCCATTCGTAATTCGAATCTGATTCTTTAGTCTTTCTTAGCAGTATCTATTAGCAGCGGAATTCTCCCTTGACTCGATCTTTCATTTCATTATGGAATTTTCTCCCAGAGCTGCGGAACTAACGACTCTATTAGAAAGTAGAATTACCAACTTTTACACGAATTTTCAAGTGGATGAGATCGGTCGAGTGGTCTCAGTTGGAGATGGGATTGCACGTGTTTATGGATTGAACGAGATTCAAGCTGGGGAAATGGTTGAATTTGCCAGCGGTGTGAAAGGAATAGCGTTGAATCTTGAGAATGAGAATGTAGGG…
Isoform_27010	AGGGTTAGAGAGAGAAGCTCTGGCTTCTTTCTAAGTATTTCTGATTCGGATTACAAACCTAGATTTCCTATTCTTAACTTCTTCTCAAATCGAGAGTCTAGGGTATTATAAAACTCCGTTCACGCATCAATTTGATTTTGCTTATAAAAGGGGTTTGGTTTGTTTTATTTAATCAATCTGTGAAAATCAACCGATCTTCATAGTCGTCGGTATATTATAACTTTTTCCGTGTTTATCTCATTTTTAAATTTCAGTTGGGATCCGTTTATTGTAAAAGCAATTTGTCATTTTCATTCTGGATCAGTCTACTCTGATTTGTGTGCCGATTGAGATTCTATTTCTATGTTGGAGATTTGGAGATTGGTGAATTAGGGTCACTTCGATGTAATTTCTGATCAT…
Isoform_27035	ACTCAACCCTTGATTCATCTTCATTACCATTCTCTATACATAATTGGGAACCAGAAGGTGGGTTCCCAATGAGGATTCGTCCTGTTTGTCCCGGAACACTTCTGGGTTTCTGGGTATGTTTAGTACTGCTATTCTCTGTGAGCTTTTGCCATGCAGATGACAAATCAGTTGAGGTAGTTGGTTTTGGAGAATGTGCTGATTGTTCCCAGAGTAAATTTAAGGCTAGCCAAGCTTTTTCAGGACTACGCATAACAATTGATTGCAAGTCTAAAAATGGACACTTTCAAACAAGAGGTACTGGAGAGCTGGATAAACAAGGAAAGTTCAAAGTATCTCTCCCTCAAGAGTTGGTTCAAGAGGGTAAACTAAAAGAGGAATGCTTTGCACAGCTTCACAGTG…
Isoform_27045	ACCCTATTCGCTATTGATCAGAGATAATCACAAATAAACCAGGGCCATGATCAATCACTACTAATTTGATCTGCGCTTCATCAATCTCGGAGACACCCTAATCGAACCAGCCGGAGAAAAACTCTTCCCCTCGTCACTTTCCCCCTTTTTCTTCAACTTGTTGCCCTTGTTGTTCGTTCGAACTTCACTAACGACCTGAATCTCCTTCCCAGGCCAAGTCTCTGAAGCCACTGCTTTCGATCCATCAGCAACCCGATCAAAATCGTCACCGAGATTCCTCACCGATCGCCAATTCAAATTAACCACGCCACCTTCCTCTTTCTCCTCACCATCACCGATCAAACCCACGTACCGCTTTCGTTTGGTAGCAACAGGAGCAGGAGGAGGCGATGGGGAATC…
Isoform_2705	CACTATCCTTGATATTGATCAACCCAGCACTTCTACACAAGATAATAACGATACCGATACCGTGCCTCGACAAGGTTATTCCGACAATATCAACCAATCGAAACTCACAGAAATGGTGAAAGACAAAAACTTGCATGTTTTCCGCGAGTTTGGAGGTGTTGAAGGTATTGCTAATACTCTTAAAACGGATGCGAAAAATGGAATCCATGGTGATGAAGATGACGTTAGCCAAAGGCGCAATATGTATGGTTCTAACACTTATCAGAAGCCCCCACCAAAAGGGCTTTTATTTTTTGTAATTGATGCTTTTAAAGATACAGTAATTCTCATCCTACTGGTCTGTGCTGCTCTGTCTCTTGGTTTCGGCATCAAAGAACATGGCGTGAAAGAAGGTTGGTA…
Isoform_27102	GTGAATTCATGCGGCTGTTGTTGATTCTGAGTGAGTTTGCAATTTTGTCCATATCTTAGCACACATCACAATAAAGTCGACATTTCTCACAAAGTGATTCAAGAAAACTATCATGAAAAAATCAGAGCTAGTAATTATCCCGGCACCGGGAATGGGTCATCTTGTATCGGCAGTGGAATTCGCCAAGCGCCTGCTCAATCGTGATTCTCAGTTTTCCATTACCGTCCTCGTTTTTAAAAACCCTTCTCAACCCATGACAGAAAAATACACAAAATCGCTCGCTGCCTCCGATACTCGAGTCAAATACATCGACCTTCCTCCTGCCACTCCACCTTCACCAGACTTGATCAATCGCCCTGAAAAATTCTTCTCTGTTTACATAGAAAATCATAAACCCCA…
Isoform_2746	CTTTTTTTTTTTTTTTTTTTTTTTTTTTCCCCTATGTGAGCTAGGCGTTGGCCACCTTCACAGCCTAGGGTCGCTTAACGCTTTTGAAAACACTGGGGCGGGAAGAGTCGGTGGAGAAGGAGATACATGAGGTGTCATAGAAACCTGTAAAGAGTTAGTACCAAAATAAGGAGTATCCTAAAAAAAAGTGACATCCATTGAATAATAAGTATGACGAGCATCTGTACCCTTTGGACACTGATGAATAACCAAGAAAAATGCAACGAATAGCCTTGTCATCCAGTTTTGTTTGAGTTAGACTCCTATTCTGTATAAAACAGGTGCACCCAAAGACACGAGGTAAAATAGGAAATAGAGTAGTATTGGGTTGGAGTACATGAAGAGGAGCCTTGCCTGACA…
Isoform_27486	CAGAAGCAGATTTTGCAGATCGCTTCAGTCGGTCATAAATTCCCATTCTGTAGTGTAGTTGGAATCTATTAGCAGCGGAATTCTCCCTTGACTCGATCTTTCATTTCATTATGGAATTCTCTCCCAGAGCTGCGGAACTAACGACTCTATTAGAAAGTAGAATTACCAACTTTTACACGAATTTTCAAGTGGATGAGATCGGTCGAGTGGTCTCAGTTGGAGATGGGATTGCACGTGTTTATGGATTGAACGAGATTCAAGCTGGGGAAATGGTTGAATTTGCCAGCGGTGTGAAAGGAATAGCGTTGAATCTTGAGAATGAGAATGTAGGGATTGTTGTCTTTGGTAGTGATACTGCTATTAAAGAAGGAGATCTTGTCAAGCGCACCGGATCTATTG…
Isoform_27766	ACTCAACCCTTGATTCATCTTCATTACCATTCTCTATACATAATTGGGAACCAGAAGGTGGGTTCCCAATGAGGATTCGTCCTGTTTGTCCCGGAACACTTCTGGGTTTCTGGGTATGTTTAGTACTGCTATTCTCTGTGAGCTTTTGCCATGCAGATGACAAATCAGTTGAGGTAGTTGGTTTTGGAGAATGTGCTGATTGTTCCCAGAGTAAATTTAAGGCTAGCCAAGCTTTTTCAGGACTACGCATAACAATTGATTGCAAGTCTAAAAATGGACACTTTCAAACAAGAGGTACTGGAGAGCTGGATAAACAAGGAAAGTTCAAAGTATCTCTCCCTCAAGAGTTGGTTCAAGAGGGTAAACTAAAAGAGGAATGCTTTGCACAGCTTCACAGTG…
Isoform_2790	GTGCTGGTGTGGAAAAGTCAAAAGTCAAAGGAGTGGGAAAATTATTGACTTTTCAAAGGAGGTGGAGATTATTGACTTTTCAAAAGAGCTGGAGATTCTGCAACAATTAATTTTGTTTCTATTTTATTAAGCAGTTTCCTATTAAGATTAGTATTGTTATTAGATTAAGACTAGTAATATTAGGAATTCTAGTTTCCTTTTATGTTTTACTTTTCCTGCAAGTAGTAGGATTTATTTTGCATGTATAAATGCTGGGTTGTAGCCTTTAGAATTCAGAGTTTCAATAAAATTAGCTTTTGCTTATTATTTTCTATTAGGATTCCAAAGAGCTTTGCCTAGTGGATTCTAGGAAAACCCTTAAGAGAGGTTATCTCTTAGAGTTCAAGGGAAGAATTGAGA…
Isoform_28132	ACTCTTAGAGCGGAATGAGGTATTTTTATTATAAAATTCAATTTCGAAATTCAACTACTGATTTGATCTTTATAATTTCATAAAATTTGATTTGATAATGAACTTCAACTACTGACAGAGGACATGGTCCTGATTTGATCTTTATTACAAATCCTCATCCGTTGTTTATCTTCTGTTTAAGCCAAGCAGTTTCCATTATAAGCATGCCATGTCTTAGGCCTTATTTCTTCTCATGGGTAACATCTTTCGCGAGAGTTGTTTGGCCATAACTTTGGATTTGCTTTAGCTATTTCCATACCTTGATGGGCAATTATTTTCTCTGTTTCTTGCTGGGCAATTTTTTTCTCTGATGTCAGCTTCTCGCCTGACGGACAGCTAAATATATGTGACCCTTCATCT…
Isoform_28423	GACTCAACCCTTGATTCATCTTCATTACCATTCTCTATACATAATTGGGAACCAGAAGGTGGGTTCCCAATGAGGATTCGTCCTGTTTGTCCCGGAACACTTCTGGGTTTCTGGGTATGTTTAGTACTGCTATTCTCTGTGAGCTTTTGCCATGCAGATGACAAATCAGTTGAGGTAGTTGGTTTTGGAGAATGTGCTGATTGTTCCCAGAGTAAATTTAAGGCTAGCCAAGCTTTTTCAGGACTACGCATAACAATTGATTGCAAGTCTAAAAATGGACACTTTCAAACAAGAGGTACTGGAGAGCTGGATAAACAAGGAAAGTTCAAAGTATCTCTCCCTCAAGAGTTGGTTCAAGAGGGTAAACTAAAAGAGGAATGCTTTGCACAGCTTCACAGT…
Isoform_28445	GAGACTGAAAAATCCAGTTGCAGATGGACCCCTTTCATTATCAACAGGCTTTTCTTTCTTTATAATCTCTTGTAATTCTCTCGAATTCCTCACACCTCTTTTCTACTCTCTCTCTACAGAGTGATAGAGAGAAAGAATGGAACTCATAATGGCAATTCCTCTTTTCATTCTTTTCCTCTTACCTCTTGTATCTCCCACCCTTCACATCCCCCACTTCACCAGTTCAAGATCCTGACCTCGTAGTACAAGAAGTACAAAGAAGCATCAATGCCTCCAGAAGAAATTTGGGCTTTCTTTCTTGCGGGACAGGCAACCCCATCGACGATTGCTGGCGATGCGACCCCAATTGGGTAAAGAATCGCCAGCGGTTAGCCGATTGCGCCATTGGCTTCGGCAAGC…
Isoform_2845	AGTCCCTATGCGAGATAGTGGTTCCGAGTCCCTATGTCGGACCATTTCCCATTTCCCATTCTTGAACTCACCATGTCCTCTACACCTAGATCCACGATTTCTTCCCACGTCCTCGAACTTTCCGTCTGTTCTCCTCACATTCATCCGCATACCAAACGGCCCCTCATTATTTTATCCGCCTCTTCGTCAGTCTCGCTGACTTTGTTTTATTGGTCTTCTATCTCCGTCTTCGTTAAATTCAACCCAATTTTCTTCTTTTCAATCTCTATCGCTCTCGATCTCAATCTTTCCATCTCTTACTCTCAGTCTCTCGCTCACGCTCAGGTATTTCTTTTTCATCTGATTCTCTACTTTCCTCTTCTCCCAGCATCGCACTCAACATCAATTCGTTGGTCATCT…
Isoform_285	CTTCCGGAGGTATTCACGTTTGGCATATGCCCGCTCTGACCGAGATCTTTGGGGATGATTCTGTACTACAGTTCGGTGGAGGAACTTTAGGACACCCTTGGGGAAATGCACCGGGTGCTGTAGCTAACCGAGTCGCTCTAGAAGCATGTGTACAAGCTCGTAATGAGGGACGTGATCTTGCTCGTGAGGGTAATGAAATTATCCGCGAGGCTTGCAAATGGAGTCCTGAACTAGCTGCTGCTTGTGAAGTATGGAAAGAGATCAAATTTGAATTTGAAGCGATGGATACTTTGTAATTTTGTAATCCAGTAATTGCTGTTACCGCCCGTTCACTTAATTGAATTGTAATTAAACTCGGCTCAATCCTTTTATTTAGTAAAAGAGATTGAGCCGAAGAAA…
Isoform_28542	ACTCAACCCTTGATTCATCTTCATTACCATTCTCTATACATAATTGGGAACCAGAAGGTGGGTTCCCAATGAGGATTCGTCCTGTTTGTCCCGGAACACTTCTGGGTTTCTGGGTATGTTTAGTACTGCTATTCTCTGTGAGCTTTTGCCATGCAGATGACAAATCAGTTGAGGTAGTTGGTTTTGGAGAATGTGCTGATTGTTCCCAGAGTAAATTTAAGGCTAGCCAAGCTTTTTCAGGACTACGCATAACAATTGATTGCAAGTCTAAAAATGGACACTTTCAAACAAGAGGTACTGGAGAGCTGGATAAACAAGGAAAGTTCAAAGTATCTCTCCCTCAAGAGTTGGTTCAAGAGGGTAAACTAAAAGAGGAATGCTTTGCACAGCTTCACAGTG…
Isoform_28622	AGAACTGGAAATAATCAAAACCCGGGATAAACCACTCTGCAATAAACACCTCTACAGGCTACAGCAGCATTATCCTCTCCCCTCATAATGTCGAGAGGAACAGACCGTCTTCTGAAGTCTCTGAAGAAGTTCGCGGACGTGCAGTACAAGTTATTCAACCGCCGTTATGGTCAACAGGTACTCAACATATTGGAGTTTCCCATAAAGCTGGTGCTGTCTCCTTTCACGCTCGCTTATGACATTGCTGGCTCTGCGCCTCGTGGCTTTGGGGTTCCTGAATTCATATCCAAGCTGTCCTTCACTGCAATTTTCGCTGTTGCATATCTTGGGACTTATGATATTGCTTTTGAGCTGGGAAAGAAGGTTTTATGTCAGAGGAATTGCCACACCTGCAATGGA…
Isoform_28664	AAATCCACCTGACCTTTTTCTCTTCGAGGGGTGTGGTGCGGTATCTTTAGTTTTAGAGGAAGAAAAACAGACGATTTGTAAAGCTGTTTTATCAATGGCGGGTGTATCTCTCCAGTGCGGAGATTGTGGTGCCCTCTTGAAGTCTGTACAAGAAGCTCAAGATCACGCAGAGCTCACCTCTCACTCCAATTTTTCCGAGTCCACTGAACCCGTCCTCAATCTTGTCTGTTCCTCTTGCGGCAAACCCTGCCGATCCAAAACAGAAAGTGATTTGCATACCAAGAGAACTGGGCATACTGAGTTTGTGGATAAGACTATGGAGGCGGCGAAGCCCATAAGTCTAGAGGTCCCTAAGCCAGTTGCGGAATCCGGGGACGATATGGACTTAAGTAGTAGCAA…
Isoform_28815	GTCAATGAAACAGGAATCCTCTTCATGACTACAAGCACAAGGAGCTGAATTGCAATTGCTGATGCAAGAAGGTGATTGAATCTATGGCATCGTAGGCTTGAATTATATGGGCGAGAAAGGGATGGAGATACTTTTGTCAAAGGGAAACCTGAAGTTTGAAGTGCTCCAATTTTGTTTTTTTGAGGTTCATCTTTCTTTGTCAGTTTTATTCATGATGCTGTCAGAAAGGTATGGATTTATCTTTTGAAGAATAAATATGATGTTTTTATTAATTTTAAGAAGTGGATAGCAATGGTGGAGAATGTGATAGGTTTGAAAGTGAATTGCTCGAGATTTGACAATGGAAGGGAGCAAATTAACGAGTATAAGTGAGAATAGGATGGAGAAGTGTATTCCCGT…
Isoform_29510	ACATTTCTCCTCTGTTCATTTCCTCTCCAAAATGGGTTTCTACAAATTCTCTTCATCCATGGCGATCTTCCTCTTCTTCCTCCTCTTCATCTCCTCATCAGCTCTAGACATGTCGATCATCAAATACTCCGAGAATCACGGAGATAAATCAAGCTGGAGGTCCGATGAAGAAGCGATGACTTTATACGAGTCATGGCTTGTAAAACACGGCAAGTCGTACAACGGGTTGGGCGAGAAGGATCGGAGGTTTCAGATCTTTAAGGATAACCTTAAGTTCATCGACGACCACAACGCCGAGTGTCGGCGACAGCTTGCCGGATTCTGTTGATTGGAGGAAAGAAGGTGCCGTCGCTCCGGTCAAAGATCAAGGAAGTTGTGGAAGTTGCTGGGCTTTCTCCA…
Isoform_2956	TTGCTGATGCATTTGGGACGCCAGTTTTGGTGATCCGGATTGCAAACCCTGTGGTTGGGATTGCTTGATCTGGATTGCGGTAAGTAGCAGAGTTTAGAAATCCTGGCTCCTTTTTGTAGCATTTTAGAACTGGACCCTGATTTGCAAGAGGCAATGGAATGTTATTTCTCTTTTGAACAAGAGATTTTAGTTTCAACATAGCATATGTGAGTCATTTTTGGTTCAATGTTTTAACAGGAACAGGAAGAGAGAAGCCGGACTACCTGGCCACAGTGGACATAGATCCAAGCTCACCTACTTATTCAAAAGTTATTCACAGGCTCCCTGTGCCATATTTAGGTGATGAACTACATCATACTGGGTGGAATTCCTGCAGCTCTTGCCATGGAGATCCAACAG…
Isoform_29599	AATTCACTCAACCCTTGATTCATCTTCATTACCATTCTCTATACATAATTGGGAACCAGAAGGTGGGTTCCCAATGAGGATTCGTCCTGTTTGTCCCGGAACACTTCTGGGTTTCTGGGTATGTTTAGTACTGCTATTCTCTGTGAGCTTTTGCCATGCAGATGACAAATCAGTTGAGGTAGTTGGTTTTGGAGAATGTGCTGATTGTTCCCAGAGTAAATTTAAGGCTAGCCAAGCTTTTTCAGGACTACGCATAACAATTGATTGCAAGTCTAAAAATGGACACTTTCAAACAAGAGGTACTGGAGAGCTGGATAAACAAGGAAAGTTCAAAGTATCTCTCCCTCAAGAGTTGGTTCAAGAGGGTAAACTAAAAGAGGAATGCTTTGCACAGCTTCA…
Isoform_29820	aAAAAAACGCGTTTTTAAATCGTTTTATAATCTAGCTCTTTTCTTGAGTTCGTTTTGAATTTTGACAGTATTGGCTACAGAGCTACCAATAGGTTCCTCTGCAAATCTGTGTCAACTGGGAGGCTGTTATCATTTGCCTTGATTTCTTTTGGGCGTCAATTACAAAACCCATTTCATTTGGTAAAAAAAAAATCTCCACATTTTGCTATTATCCATTGGGATTTGTTTTTTGAAAGGGAAAACGCGTTTTAAGATGACCAATGATGCATCTTGTGTTCATGTTTTTCTGCAAATCTTTGTAGTGAAATATTACCTTCTGAAAATATGATATTGATAGTGATGAAATATATGCTTATTGATTAAGTGGTTGAAAAGTTGGGAGAGAAGTAGAATAAGAAA…
Isoform_29911	CAGCTAGCAAACACACATTTGGACTGCCCGGGAAGCTAAAATTCTCGCCAGCAACGTGCACTTCAGCCTTCTTATGGCCTCACTTTAAGTACCCGCCGCTACCCAAATTCCCACCCTTGCCCACAGGTCACCCATGGCTTAAGCCATTTCCTAAAGTTTACCATCCACCTTTGAAGAACTTTGGTCATCCTATGTTCCCATTCCCTCCAATATATAAGAAGCCTTGCCCTCCAATACCAATCTATAAGGAGCCACTTCCACCACCGGTACCAATCTATAAGGAACCACTTCCACCACCTATTGAACTTCCACCGCCTATCCCAAAGATCGAAAAACCACTTCCACCACCTATTCCAAAGATTGAGCCACCGCCGCCTATCCCTAAGATCATAAAGCCGC…
Isoform_30127	ACTCAACCCTTGATTCATCTTCATTACCATTCTCTATACATAATTGGGAACCAGAAGGTGGGTTCCCAATGAGGATTCGTCCTGTTTGTCCCGGAACACTTCTGGGTTTCTGGGTATGTTTAGTACTGCTATTCTCTGTGAGCTTTTGCCATGCAGATGACAAATCAGTTGAGGTAGTTGGTTTTGGAGAATGTGCTGATTGTTCCCAGAGTAAATTTAAGGCTAGCCAAGCTTTTTCAGGACTACGCATAACAATTGATTGCAAGTCTAAAAATGGACACTTTCAAACAAGAGGTACTGGAGAGCTGGATAAACAAGGAAAGTTCAAAGTATCTCTCCCTCAAGAGTTGGTTCAAGAGGGTAAACTAAAAGAGGAATGCTTTGCACAGCTTCACAGTG…
Isoform_30174	AAGCCTAAAATAGAAGAGAACACTAATAGACTAATTGTACCCCGCTCTCTCTCTCTCTCTCTCTCTCTCTCTCTCTCTGCAAACTTCTACTGTTAGAATAGGTTATCCAACTCTCTATTGCTCCGCCCAAACAGCAAGCATAGTTATCTTATTTCATCTCTCTCTCTCACATACTCCCACTCTCTCTGTTTCTGTACTGTTCGTGCTAACCCATCCAGATTTTTTTGGGTTTTTGTTTTTGTCAGAGAATGAGTGGCACAAAAGCCCAAATCAGTCTTCTTCTCTTGCACTTGTCTATTTCTCTGCAATTTATCTGACTGGGATCATCAAGACGAGATCCTTAGTTCCGTTGCTTGATTTCTGAGCTATTATCAGGTAATTTGTATTCAACAAAAGGAG…
Isoform_30231	ACTCAACCCTTGATTCATCTTCATTACCATTCTCTATACATAATTGGGAACCAGAAGGTGGGTTCCCAATGAGGATTCGTCCTGTTTGTCCCGGAACACTTCTGGGTTTCTGGGTATGTTTAGTACTGCTATTCTCTGTGAGCTTTTGCCATGCAGATGACAAATCAGTTGAGGTAGTTGGTTTTGGAGAATGTGCTGATTGTTCCCAGAGTAAATTTAAGGCTAGCCAAGCTTTTTCAGGACTACGCATAACAATTGATTGCAAGTCTAAAAATGGACACTTTCAAACAAGAGGTACTGGAGAGCTGGATAAACAAGGAAAGTTCAAAGTATCTCTCCCTCAAGAGTTGGTTCAAGAGGGTAAACTAAAAGAGGAATGCTTTGCACAGCTTCACAGTG…
Isoform_3075	ggaatAGGACTTGGGTATTTTTATGTGTTACCGAGTTTCTAATGAGAGGAAACAGAGGGAGAGGAGAGGATTTGGTTTCCCTTCCACCTTAGTTTTCTTTCCCTCCCAAAATGAACGGAAACGGAGGGAGAGGAAAGCATGTTTAATAAAAAATGGATATTCCAAAGTTACCACCTCTTTTTTATTAGATTTCAACTATAGCTTAAAAAATAAAGAGGGTATATTAGTAAATCTCAAAAATAGAATCATTTATTTTCTTTTTCCTTATTAAACTTGGTAACACATTAAGTAGGATAATGTTTCTTTCCTTCTTCTCTCCTCTCCCTCATAACTAATGATTTCCTCTACTTTTCTTTCTCTTAAAAACTCGGTAACATAGTGTTAGAGATTTGCAATTAC…
Isoform_30824	AGATGGTAGTAGCTATGTGTTCGAATTATTATGAGAGTGATGGAACTGTAAAGTCGATGGATGGCGAAGGAAGGAAAAAATTTGAAGCAATAATCCAAGCAATGGCAGCTAGTAGCCTGAGGTGCATTGCTTTTGCGCACACACAAATTTCAGAGAAAGAAAAGGAAAAAAAGGAAGATGAAAAGACCCACCACGAGCTGAAAGAAGATTGCTTGACCTTGCTAGGGATAGTTGGTCTCAAGGATCCATGCCGTCCGGGTGCCAAGAAAGCTGTGGAAGTATGCAGACTTGCTGGAGTTGACATCAAGATGATAACCGGCGACAACGTTTTCACAGCAAAAGCTATAGCCACGGAATGTGGGATACTTGGTCCAAAGCAACAAGTAAACAGCGAAGAAG…
Isoform_30844	CATGGGAAGTATTTTTTGTTTAATTATATATAAAATTTAATATTATGTGTTAATTATAAATTCTGTAATTATATATACATTAATTTACTAATACATATTCTTCATTTAAAATATATGAAGGGAAAACAATTAAAACTACATAAATCATAAAAACACGAGCAAAGTTAATAAGAAAGAGTACCAGGGAATGGATGTTGTGCTTGAGAAACTGAAGTCGGGATCAAGCTGTCGAGCTTTGGAATAGTTTTATACTCAAGCTCAAAAACGACATCGTATTTTGCTCAAGTTCAAAAATGGAACAAGTTACTAAAATATGCTGTTTGTGTCCAAGTGTTGGGCTCCAAATATATTAAACATTTGGACACAGATTTTCCATGTGCAACACGTGTCCGTGAACTG…
Isoform_3119	TTTTTTTTTTTTTTTTTTTTTTTTTTGAATAATATGCACAAACAGAAAAATAATAAAAATAAAAATAAATAGAGGTTTTTTTCAAAAAAAACAGAAATCACAAGATAAAACATTTAAAATACCAGGAAAGAATTTTGAGTAGAATCAAAACTTGTAGACTAAGCTCTGATACCAATCTGTTGTAGGACAAATTATTGAAAGTAAAAAGATATTAGAAAAGAAAGAGATTTCTCTCAATCCTTCCCTTGAAATCTAAGAGGTTAAATCTAAGAGATAACCTCTCTTAAGGCCCCGTTTGATACGGTGGAATATGGATAGGATTGTGATTCCAACCCCATAATCCATGGTAAGTGATAAAATCAAGAGTTTGTTTTGAGGTTAAGTGAGTGGGAAAAAGAG…
Isoform_31341	AACATCCATGGCTCTCTTGCATCTTACCCCTTCTCAGTCATCTTTTCCACAGTGCCTGTCCGCGTTTAGTGCTCGAACCCGAATCAGACCCGTCCGAATATCCATAGTCAAAGCTCAAGCCGGCGTTCGCCAAGAGAACATTGTTATCGTCGGTGCCGGTATTGCCGGCCTTGCTACGCACTTTCCCTTCAAGGTTAGATTCAAAACCTCACAAATTCATCCAAAAGATTGACTTATTTTGATAAATACAGGTTATGAAAAAAGTGTTTCTGGTTCATAATCAACCAACCAATTCATCCAAGAAATTGACTTATTTTGATGAATACAGGTTATGAAAAAAGTGTTTCTGTGCCATAATCACATATTTTATAAAATCAACTGAGAATCACTTATTCTAAG…
Isoform_3145	GGGTTTTCCTTGGAGAGGCAGTTTTTGTGGTACTCTATTATGGCAAGCACGAATGGGATTCTAATGCAGGGAAAATGCTGCGTGGCAATCAAAAAGTTAATATGGCTGATGTCAGGGTCTCTTTCCCTCCCTTCTCTCTATCTCTCTATTCACTCTCTCTGTGTGTGTGTGGGCCCCTTTCTTCTTCACGCGAACCTCCCGGTTTCTGCTGATTGGTAGGTTTCCTGGTGCGAGTGTGGCGCTGCATGAATTTGTTGAGAGGTGGTGAGGACTTGGTCCTCCATCCTCTTGAGTCTTTCTTCCTCTCCTGTGCTTGTAGTCCCTGTAATCCTTTGCCTGTTCTTCCTTGGTTTCCTGTCTGTAATCACAGGACTCCTTGGCTTCTCTCTTGTTTTCTGT…
Isoform_31479	cgaGTCATGGCTTGTAAAACACGGCAAGTCGTACAACGGGTTGGGCGAGAAGGATCGGAGGTTTCAGATCTTTAAGGATAACCTTAAGTTCATCGACGACCACAACGCCGAGAATCGGAGTTATAAACTTGGGTTGAACCGGTTTGCTGACCTCACCAACGATGAGTACCGGTCCATATATTTGGGGACGAAGATGGATGTAAGAGAAGGGTGTCGAGGACAAAGAGTGATCGGTATGCTCCAAGTGTCGGCGACAGCTTGCCGGATTCTGTTGATTGGAGGAAAGAAGGTGCCGTCGCTCCGGTCAAAGATCAAGGAAGTTGTGGAAGTTGCTGGGCTTTCTCCACCATTGCTGCCGTGGAAGGAATAAACAAGATAGTCACTGGCGACATGATCACT…
Isoform_317	GTTGGTATATTCTCCTCGTATCCGTTAAGTACTCTATTTCTTATTGGATGTGAAAGCCACCGAAAAGCTCCAACGTTTTAGAGAGAAATTTCGAGAGAGAGAGAGAGAGAGAGAGAGATGGTTGGAAGGGACGGTAATGGTATGATGGATGGAATTTGGGGAGGAACTCTGCCTCTCTGAATTAGCAAACCTACTTGCTTTCTCTTCGATCTTCACTAACTAAATTGGAAAAAATAGTAAAAAAAAACATGGGAAAAGAGAGACTCACTGATTAAGGTTCTGGGCTGGGTTTTTTTGTTTTGTCATTTACGCATAGTTAGGTTTTCTGGGTATCAATGCCCTTGTGAAGCAGCAAATGGTTTCATGAAAATGCTAAGCTGGTTAAAGCAGCTGTTTTGG…
Isoform_31712	CTCGACCCTACCGATTCTCAATCCCTCTGTTCTCGACCCTTCGTCAGTCTTTGCCATTATATTCTCTCGATTCTCGATTCTCATAAGTCTCAAAATCTATCAGTTCTTTCCGTATCATCTAATATTCCCTGCACCTAGAACTCTCGCAATTGTTTTCAAGCCTCTCAACAGTCTTTGCCACGCGGTTCTTCGAACTCTCCACGCGGTTATTCAATAGTCTCACTCATCCAGGTATCACGGATGACAAATTCGTAGCAAAATACCCCGGGAATCGTATATGCTCTGTATCGACTTTGTGCTCCTACTGCGGGTCTAGCTTTAATTATGGTGTAATCAAATTATACCCAACGATGCGCTATAAAGGCAAGCCTCTTCGCTCTTTGTCCCATTCTTCGCTCT…
Isoform_31875	AGAACTGGAAATAATCAAAACCCGGGATAAACCACTCTGCAATAAACACCTCTACAGGCTACAGCAGCATTATCCTCTCCCCTCATAATGTCGAGAGGAACAGACCGTCTTCTGAAGTCTCTGAAGAAGTTCGCGGACGTGCAGTACAAGTTATTCAACCGCCGTTATGGTCAACAGGTACTCAACATATTGGAGTTTCCCATAAAGCTGGTGCTGTCTCCTTTCACGCTCGCTTATGACATTGCTGGCTCTGCGCCTCGTGGCTTTGGGGTTCCTGAATTCATATCCAAGCTGTCCTTCACTGCAATTTTCGCTGTTGCATATCTTGGGACTTATGATATTGCTTTTGAGCTGGGAAAGAAGGTTTTATGTCAGAGGAATTGCCACACCTGCAATGGA…
Isoform_32216	AGAGTGGTCCTTTAGAATTCGTATGGGCATGGTTCGTTCATCTACCTCCTCTTCCCTTCCCTTTCCTTTCCCTCCCCTTCTTTTTGGATTGTAAATCGATCTCAGGATACAAAATCTGGAGAAGTGGAGTGTTCAAGTCCTGCCATGCTTTTCCACAGCTTTCTTGAACTTCTTCATTCGTTTAATCTCTCATGATTTAATTTTCACCGTAGAAGCTCAAGAAAGCTGTGGGAAAACATGGCGATTCAGGATTTTGCTGCCATTTCTGTATATGCACGTGTGTCTATGGTAATTCTCCGACCCATTATCTCAATTTTTCTGCTTTTAGTTTTATATTATAATTCAAATGAATCCTTTCTGTTCTCTTTTTTTCCTTTCTTAAAGATTAATTCTTTGACT…
Isoform_32241	TAGTGAGACTCGGTAAACCCGGTCCACTGTAGGTGCTACTTCTTGCTCTTTTGCCTCTGCCTTTCCACGCTTGACTGCTCTGCTAACGGTAAACGGTCGTGTCTCGGTCTGTTTGGTTTATGGATTGAACGAGATTCAAGCTGGGGAAATGGTTGAATTTGCCAGCGGTGTGAAAGGAATAGCGTTGAATCTTGAGAATGAGAATGTAGGGATTGTTGTCTTTGGTAGTGATACTGCTATTAAAGAAGGAGATCTTGTCAAGCGCACCGGATCTATTGTGGATGTTCCTGCGGGAAAGGCTATGCTAGGGCGTGTGGTCGACGCGTTGGGAGTACCTATTGATGGAAGAGGGGCTCTAAGCGATCACGAACGAAGACGTGTCGAAGTGAAAGCCCCTGG…
Isoform_32249	CGAGAGAGAAGAATTATTATCTTTTCGAGGTGTATCACTTGAGCCAGAAAGGTTTTCGGTTCGTTGTGGATTGGAAGGCATTTACATACCAGGAAGAAGGTGGAGAAGGAAACTTGAAATTCTCCAACCTGTGGAAATCCATTCTTTTGCAGCTGATTGTAATACAGATGACCTTCTTTGCGTCCAGATAAAGAATGTTTCTCCAGCACATACACCAGATATAGTGGTTTTTCTAGATGCCATATCAATTGTTTTCGAAAAAGCTTCAAAAGGTGGACAACCTTTATCGTTGCCCATTGCTTGTATTGAAGCTGGAAATGATCACTGTTTACCAAATCTAGCCCTCAGGAGAGGCGAAGAACACTCTTTCATTCTCAAGCCAGCAACTTCTATGTGGAA…
Isoform_32472	ACTCAACCCTTGATTCATCTTCATTACCATTCTCTATACATAATTGGGAACCAGAAGGTGGGTTCCCAATGAGGATTCGTCCTGTTTGTCCCGGAACACTTCTGGGTTTCTGGGTATGTTTAGTACTGCTATTCTCTGTGAGCTTTTGCCATGCAGATGACAAATCAGTTGAGGTAGTTGGTTTTGGAGAATGTGCTGATTGTTCCCAGAGTAAATTTAAGGCTAGCCAAGCTTTTTCAGGACTACGCATAACAATTGATTGCAAGTCTAAAAATGGACACTTTCAAACAAGAGGTACTGGAGAGCTGGATAAACAAGGAAAGTTCAAAGTATCTCTCCCTCAAGAGTTGGTTCAAGAGGGTAAACTAAAAGAGGAATGCTTTGCACAGCTTCACAGTG…
Isoform_32596	AAGAAAGTCCATTTTTCTTGTCCATGGCTTCCTTCGCAACTCTGAAATCAATAGTGGTTATCAGTTGTCTTGTACAAATTTCCTCAATCAATGGCCACAGAAACGATGACCAGCCTCAGGGTATCGCTGTGGACTTGCATTCAAAAGACTTAATTTTGGTGAAAATTTGGTGTCTGTTAATTCTACTAGTGATCTCTTTAGCCGGTGGAGTTGTTCCTTACTTTTTCAGAGGGAACGAGAGCTTTCTCCTTTTGGGAACTCAATTTGCGGGAGGGATTTTTCTGGGGACCTCTTTAATGCATTTCCTGAGTGAGTCAAACTACATATTTGGGGATCTCATAAGTTCTGAATATTTTGGTTTCATGCTTGCATCAGTAGGTTATCTTCTCCCGGCGTTGG…
Isoform_32688	CGGTTAACCAGATATGTAGCAGTAAGGACTGCTCAAGTGCCAAAAAGATTTGGGAACATTCATACCCCGAAGTAGACACCGAACAACACTCATGAGTTGACGATTTTTGCGTTCGGCAACACCATTTTGTTCAGGGGTGTGAGCACAAGTGAGTTGCTGTAAAATACCCTTCTGGTTAAGTTGTGAGCAAAAGTCATTAGAAATATATTCCCCCCATTATCAGATCGAATACTACGAACAATGACATCATGTTGGTTTTTATCATTTGCAAAAATTGAGGTGAATATGGCAAAGACTTCAGATTTCATTTTTCAGAAGATAAAGCCAAGTGCATCGGGTGTGATCATCAATAATGTGACATACTATCGTGTACCAGGACCAAGGCAGTAGTTGGAGAGG…
Isoform_3277	TTTTTTTTTTTTTTTTTTTTTCTCGAGTTATAGAGATCTTATTTAAGCAAGATGGAGATACCAGCTCGAGTTTAAAATAGATGCATAAAATACCATAAAAACTAGCAAGCTCATAATCAACAGACACAACAAGCTTCTAACTAAACCAACAAGGCAATCTCGCCTCACTCTCCCACATAATACTTAGCCGCATCCACAAGAACACTTGTCATTTTATCAACCAGCTCTTGCATCTGTTCCCTTGAATGCAATGGCGATGGATAGACACAAACACAATCCATCCAACCATCTCTTATGGTGTCAAATATAGCAATGGATGGTCCAATACCATGAACCGAAGCGCAACCCATGCAATCCTCCAACCCGACCTCTCGGTGCGTGTTTGTTGAATCGTCAACG…
Isoform_32903	CGGAACTAACGACTCTATTAGAAAGTAGAATTACCAACTTTTACACGAATTTTCAAGTGGATGAGATCGGTCGAGTGGTCTCAGTTGGAGATGGGATTGCACGTGTTTATGGATTGAACGAGATTCAAGCTGGGGAAATGGTTGAATTTGCCAGCGGTGTGAAAGGAATAGCGTTGAATCTTGAGAATGAGAATGTAGGGATTGTTGTCTTTGGTAGTGATACTGCTATTAAAGAAGGAGATCTTGTCAAGCGCACCGGATCTATTGTGGATGTTCCTGCGGGAAAGGCTATGCTAGGGCGTGTGGTCGACGCGTTGGGAGTACCTATTGATGGAAGAGGGGCTCTAAGCGATCACGAACGAAGACGTGTCGAAGTGAAAGCCCCTGGGATTATTGAAC…
Isoform_33373	AGCCGGTTGTTTTTAGGTTTACATTTTGGTCTTCACAATGTAAAGAATTTAATGATTTTCCTTTTTCTGTCTTATATATGGACTGGCAGAATATTATCTTTGCATAAGCTTTTTGTCTTGATGTAACTCTTTTGTGGATCTCTGGTTCACTTATTAATATAAGTTTTCTATGTATTATAAAAAAAAACGTTTCTCCATCTCATTTCTGTTGGACTACTGTAGTTGTACGAGGATTTTCTGAGATTTAATTATCGAGTGTCATGGCCATTAAATCTCGGTCTTCATTATATTCATTAATTATTATTTATTGGTATTTATTAGTCTAGGGGTAAAAGCGACATTTTGTATATTTACTTTTCAGTATAAATATATGGGTCTTAATCTGAATTCACACAAGAC…
Isoform_33374	ACCCATCAAAAGAAATCGAACTTTCTCAACAATGGCGGCATACAACTCCCATAACCCTCTCCTCGCTCTTCTTTTCATCCTGCTCGCAATAAGCGGACAAGCACTTGCTGGACGTGACACCCCGACCAACTCCAAACAAGTTGACAAAAAGAGCCTGATTGGTTTTTCAAAGAGAAACTGAAACACCACGGCAGTTTTTACATTCCAGGCATCGGATGGGTAAACGGTGGCAGTTTAGGTGGTGGTAGTGTAGGAGGTAGTGGTGGTGGCGGTAGCACTGGATCTGGTGGTGGATCCGGTGGGAGTTATGTTTCAGGTGGTGATGACACATTCGTTCCAAGATGAAAAGCCTTGTCCACCACCAACCCCAAAGATTGAGAAGCCACTTCCACCACCTAT…
Isoform_33403	ATAGGTGAAGTCGCGTCTTTGATCAAATAAAAATCAGTTCCCTTCTTTGGGTTCCGATCGTACGTTCTCAGCTCCAGATTTATTCGCAGTGGTCTTTCGCCTGTGCTTCATGATCTCTCCTTCAGATTTTTCAATATTCATCGGATCTACTTTGATTTGTTGATTTCGAGCAATTCGTTTCTCTTTTGGGTTGGAGGAGCGACCAGTGTCAGGTTATACCCGTAGTAATCTGGTTTGGATCAGATCACATCGCCAGCAGTTGTTTGGTTCGTATCTATGATCGTGGATCTCAATCATATCACTACTGGGTTGGTTTGGTCTTCGGTCAAATCAGTGCCTTAACTGGTTTACGAAAAGGGTTCTGGCTATTCTTGGGTTCAGACAAAAATGATCTCTGAT…
Isoform_33417	GTCATCACATAAAGTAGAGTTGTGTCAGAGACATGGCGAGCGCCGTCGCGAATGGGCTGGCGGGAGCCGGTGGTGGTATTATTGCTCAGATTGTTACTTATCCTCTTCAAACGGTGAATACGCGCCAACAAACCGAGAGAGTCGCAAAGAAAGGCCTTGTCACTTCAGGTGGGAGCTTGCCTTCCTCCAATCGGCCAGTAGGTGGCGCGCTTCTTCAAATCATGCAGGTCATAAGAAGCGAAGGTTTGGGAGGACTTTATAGTGGCCTCAAGCCTTCTCTGCTTGGAACTGCTGCTTCACAGGGCATTTATTACTATTTTTATCAGGTTTGCAAAAACAAGGCTGAAGCGATTGCAGCTCTGCGTAAAGTCAAAGGAAATGGAGATGGCACTGTTGGCA…
Isoform_33435	CAAATCCACCTGACCTTTTTCTCTTCGAGGGGTGTGGTGCGGTATCTTTAGTTTTAGAGGAAGAAAAACAGACGATTTGTAAAGCTGTTTTATCAATGGCGGGTGTATCTCTCCAGTGCGGAGATTGTGGTGCCCTCTTGAAGTCTGTACAAGAAGCTCAAGATCACGCAGAGCTCACCTCTCACTCCAATTTTTCCGAGTCCACTGAACCCGTCCTCAATCTTGTCTGTTCCTCTTGCGGCAAACCCTGCCGATCCAAAACAGAAAGTGATTTGCATACCAAGAGAACTGGGCATACTGAGTTTGTGGATAAGACTATGGAGGCGGCGAAGCCCATAAGTCTAGAGGTCCCTAAGCCAGTTGCGGAATCCGGGGACGATATGGACTTAAGTAGTAGCA…
Isoform_33466	TTTTTTTTTTTTTTTTTTTTTTTTTTTTCACAAAGTCTCATATATTTCCCTTTAATTAATAGAAAGAAAGATACAAAATATAATTCTCATATATTATCTCACAATAGAAATCCTACTTAATCAAATTAAGTAACCAGTCTCATTTTTTTCGTGTTGTTAACTAATAGAAAGAAAGATCGCACGAGTGAATATCCAAGCTCAGATATTACCTCAAAGATATTCTACGTAATCTGATATTCTTTACTCGTGAATAAAGATATTACCCCTAATTTTCTCATTTTCTTTCTTTGGTGAACTCTCTTTTGAATTCCCTTTTTTCTTTGGTGATCTCTCTTTTGAACTCCCTTCGCGTAATTCTTCTTTAGTCCATGCATATCCTTTTTTCCATCATTTTCAACC…
Isoform_33689	ATATACGAAAATCGCATATCACGCAGAGTACATGGGACTCTCTCTCTCTTACTTTTTCATTCATTCACACCTCCATTAATCATTCTCGTCTACTTCACTAAATAGCTAAAAGTCCATTAAGCTCGAAATCCCATTCCTTGTTTCAGATACACAAGCCGACGAATCAAAACCGTCTCAAGATAAGATCATAGTGCGCAGAACCTGACATTTGCAGATTCATTATGATTTGATTTGAGCCTCTATATGTACCACAACTTCTTTGATTTTGAATAAAGGAATCAGAACCAGAGTACATTTTTACTGTTCCCTGCTCAGCTTTTATGGGATCTTTTTCTTTTCTTGCGATAACCCAAAAGGATCTCTCTTCATCAAGGATCTGTCGACATTGAAGCTTCTTTT…
Isoform_33807	ATCCTTCCAATATTCTCGGTATCCTCTCCCTCTCTTGGTCTCTTCCTTCTCTCACCCTCAAAGCTTCTCACGACATTGAAGAATATCACTCTTCCTCTCTCAGTCTTCCTGCTATTTCGCTCTCTGGTCCCTCACGACATAGAAGAATGTCATCATCTCACGACATCGATTGCATTGAATATTCAGATCTACAAGATTTTTATATTCTTGCATATGTTCTACCTATTTGATTCTGCCACGACTAACTCTTTAACCACCGCCCTCTTTCTGGTAAACGAATCTGTACCTCTACCAGATCCGTGAACACCGCCATGAACCCATCGCTCTGACGATCTTCTCAAGTGACAGATTTAATAATTTGTTTTTTTAATCAAGTCAAGTGATTTGATTGTCCATAAC…
Isoform_34117	GTACCGAACTTATAAAATTACAACAAATCCACACAACATTCAACCAAATGCATATCAAATCATCAAAATTGTAGTTCCTTCTTCAAATTACATGTGCTCAAGTAATACAGATAAGGATACTTTAGAGGTTGTCATCACATAAAGTAGAGTTGTGTCAGAGACATGGCGAGCGCCGTCGCGAATGGGCTGGCGGGAGCCGGTGGTGGTATTATTGCTCAGATTGTTACTTATCCTCTTCAAACGGTGAATACGCGCCAACAAACCGAGAGAGTCGCAAAGAAAGGCCTTGTCACTTCAGGTGGGAGCTTGCCTTCCTCCAATCGGCCAGTAGGTGGCGCGCTTCTTCAAATCATGCAGGTCATAAGAAGCGAAGGTTTGGGAGGACTTTATAGTGGCCTC…
Isoform_34124	ATGCTTTTCCACAGCTTTCTTGAACTTCTTCATCTGTTCAATCTCTTAAGATTAATTGTAATCCATAGAAGCTCAAGAATGCTGTGGGAAAACATGGCTATTCAGGATTTTGATTTTGATTTTGCTTTTGCTTCTGGTTCTGTTTCTATCCATATTCCCATCTCATATAAATCAATATTCAAACACCTTAGTTTTTTTTTTTTAATCTTTTTTGGGGATCTCAGAATTTTTGGTTTTTGTTATGAGGCATGAATCGGTGCTAATCTCATATATAATTGAAACCCAACTCATCATACATAATTTTTGTCAGATTCTTTTTTTTTTCCCGAGAAAATGGAGTTTCTTTAAAATAGTGATGATATTTTTTTTTTTTTCAGATTTTGTTTTTAAGACATGAAT…
Isoform_34431	AATGGCGGGTGTATCTCTCCAGTGCGGAGATTGTGGTGCCCTCTTGAAGTCTGTACAAGAAGCTCAAGATCACGCAGAGCTCACCTCTCACTCCAATTTTTCCGAGTCCACTGAACCCGTCCTCAATCTTGTCTGTTCCTCTTGCGGCAAACCCTGCCGATCCAAAACAGAAAGTGATTTGCATACCAAGAGAACTGGGCATACTGAGTTTGTGGATAAGACTATGGAGGCGGCGAAGCCCATAAGTCTAGAGGTCCCTAAGCCAGTTGCGGAATCCGGGGACGATATGGACTTAAGTAGTAGCAATCCCGAAGAAATGGTTGTGCCGGAGGTTGACAAGAAGTTGCTTGAGGAACTTGAAGCAATGGGTTTCTCGACAGCGCGAGCGACCCGGGCACT…
Isoform_34676	GAACCAAGCCCAACATTTCGACCATGGGAGCAGATCAGTTTGATGATTTTGAGCCCAAGGAAAGGACCCAAAAGCTCTCCTTCTTTAACTGGTGGATGTTTAGCATTTTCTTCGGTACCCTCTTCTCGAATACTTTCTTGATTTACATACAGGACAGGGTGGGCTGGGCCGTCGGCTATGGCCTTCCTACACTCGGCCTTGCAATTTCTATCATTGTGTTCTTGATGGGTACCCCTTACTATAGGCACAAAGTGCCTTCAGGAAGTCCTTTCATTAAGATAGCTAAAGTACTTGTGGCCGCAGCGAGGAAATGGAAGGTAGTGGTCCCAAGTGACCCAAAAGAGCTTCATGAGTTAGGCCTGGAAGAGTATGCCAACTCCGGGAAGTTTAGAATTGACT…
Isoform_350	TCATGAAAGTTTTCATCTGTGGAATACATCTCTAGCAAGCATTCTAACCCAATCACCTTGAGTTGTAAAACAGTTAAGACTTCAGCTCTCCTGCTTAAAGCATCGACTACTTTCATTTGTACTCCTGATTTGTGCTTAATCAAATAATGAAACTTTTGTATGAAAGCAACCCATCTCATGTGCATTGACTTCGTAGGCTTTTGACTGTGGATATTCTTCAATACTTGATGATCACGGTAAATAACGAACTCTCGGTGTGTCAAATAGTGCTCCCAAGTCTTTAAAGCTTTGAAGATAGCGTAAAACTCCATCTCATAGGTAGTCCACTTTAATCTAGCTTCGCCAAGCTCCTTACTAATAAACTCAATCAGATGTTCTTCCTCAGATAACGCAGTCCCA…
Isoform_35192	ATTCACTCAACCCTTGATTCATCTTCATTACCATTCTCTATACATAATTGGGAACCAGAAGGTGGGTTCCCAATGAGGATTCGTCCTGTTTGTCCCGGAACACTTCTGGGTTTCTGGGTATGTTTAGTACTGCTATTCTCTGTGAGCTTTTGCCATGCAGATGACAAATCAGTTGAGGTAGTTGGTTTTGGAGAATGTGCTGATTGTTCCCAGAGTAAATTTAAGGCTAGCCAAGCTTTTTCAGGACTACGCATAACAATTGATTGCAAGTCTAAAAATGGACACTTTCAAACAAGAGGTACTGGAGAGCTGGATAAACAAGGAAAGTTCAAAGTATCTCTCCCTCAAGAGTTGGTTCAAGAGGGTAAACTAAAAGAGGAATGCTTTGCACAGCTTCAC…
Isoform_35226	GGGGCCAAAGCGACGGTTGTGAAGGCTTTGAAAAATAAAGTATTCCAATTCATAACAATACGTCACCATCATCCACGCATTCACATTCAGACCTGTTTGGTAGATAAAGTAAACTACTATCGTTGCCGGACATAAACGAAAATACATTTATCTCAAAGGGGGAGGAGGAAGAAATCCACCACAATGTCTGTAACCACAACCCCTACCGCCGCCGCCGCCGCCGCCATGGAAAGGCAGACCTACTGGTGTCACGAGTGTGATATCAGCGTCTCTCTCCTCGTATCCTCTGGCAACGACACTCTCCTCTGTCCTCACTGCCACAGCGACTTCCTCGAGGAAATGGAGTCTTCCCTCCCCATCTCCCCTAATCCTAATAATTCGCCCTTTCCCATTCTATCT…
Isoform_35358	TCACCCATGGCTTAAGCCATTTCCTAAAGTTTACCATCCACCTTTGAAGAACTTTGGTCATCCTATGTTCCCATTCCCTCCAATATATAAGAAGCCTTGCCCTCCAATACCAATCTATAAGGAGCCACTTCCACCACCGGTACCAATCTATAAGGAACCACTTCCACCACCTATTGAACTTCCACCGCCTATCCCAAAGATCGAAAAACCACTTCCACCACCTATTCCAAAGATTGAGCCACCGCCGCCTATCCCTAAGATCATAAAGCCGCTTCCACCACCAATCCCCAAGATGAAAAAGCCTTGTCCACCACCAACCCCAAAGATTGAGAAGCCACTTCCACCACCTATTCCAAAGATTGAGCTACCGCCGCCTATCCCTAAGATTGTAAAGCCGCT…
Isoform_35541	AAGAAAACTATCATGAAAAAATCAGAGCTAGTAATTATCCCGGCACCGGGAATGGGTCATCTTGTATCGGCAGTGGAATTCGCCAAGCGCCTGCTCAATCGTGATTCTCAGTTTTCCATTACCGTCCTCGTTTTTAAAAACCCTTCTCAACCCATGACAGAAAAATACACAAAATCGCTCGCTGCCTCCGATACTCGAGTCAAATACATCGACCTTCCTCCTGCCACTCCACCTTCACCAGACTTGATCAATCGCCCTGAAAAATTCTTCTCTGTTTACATAGAAAATCATAAACCCCACGTAAAAGAAGCAATTACAAACCTTACATCCTGCAACTCTGTTCCAGTTGGGCTGGTGGTCGATATGTTCTGCACCTCAATGATAGATGTAGCAAATGAA…
Isoform_3563	ccTTCATTTCAATTTCGAGACGTTACTTTCTCCCTCTCTCTCTCTCTCTCTCTCACTGTCTAACTTTCTCTCTCTACAAGCACTTCCCTTTCTGTCCATCTCCCTTTCCTCGGTTCCATCGAATCGGCGTGCATATCAAATACCTTTCGTTGTTATCTGTTGTCGACGTTGAGTCAGTGAAGATGAAGGCTGGTGAAACTAATTGCTTCAGATTTCATTATTCTCTTCAGCTCTCCCTGTTCCCCAAAGATGGTTGAGTGATTTCATAATTCTCTAGATCCGTGAACACTTTATTTCTCTACTGTAGCTGTTCTTTTCCCTTCAGAGTCAGATTATTTTTGATCATCTTTAATTGGGCATGTGTGGTGGTTCGGATCAATCAGAATCTGCGTCTTCTCC…
Isoform_35949	TGGTATCAACGCAGAGTACATGGGGACTCAACCCTTGATTCATCTTCATTACCATTCTCTATACATAATTGGGAACCAGAAGGTGGGTTCCCAATGAGGATTCGTCCTGTTTGTCCCGGAACACTTCTGGGTTTCTGGGTATGTTTAGTACTGCTATTCTCTGTGAGCTTTTGCCATGCAGATGACAAATCAGTTGAGGTAGTTGGTTTTGGAGAATGTGCTGATTGTTCCCAGAGTAAATTTAAGGCTAGCCAAGCTTTTTCAGGACTACGCATAACAATTGATTGCAAGTCTAAAAATGGACACTTTCAAACAAGAGGTACTGGAGAGCTGGATAAACAAGGAAAGTTCAAAGTATCTCTCCCTCAAGAGTTGGTTCAAGAGGGTAAACTAAAAGAG…
Isoform_36016	GACAACTGTGTGGACCGATGGACTTACCAGCCTTGATCGTTACAAAGGACGATGCTATCACATTGAGCCTGTTGCTGGAGAAGAAACTCAATTTATTGCTTATGTAGCCTACCCACTCGACCTTTTTGAAGAAGGTTCTGTTACTAACATGTTTACTTCCATTGTGGGTAATGTATTTGGGTTCAAAGCCTTGCGCGCCCTACGTCTGGAGGATCTGCGAATTCCTACTGCTTATGTTAAAACTTTTCAAGGTCCGCCTCACGGCATCCAGGTTGAGAGAGATAAATTGAACAAGTATGGCCGTCCCCTATTGGGATGTACTATTAAACCTAAATTGGGATTATCCGCTAAAAACTACGGTAGAGCAGTTTATGAATGTCTTCGCGGTGGGCTTGATTT…
Isoform_3610	AACGTTTTAGAGAGAAATTTCGAGAGAGAGAGAGAGAGAGAGAGAGATGGTTGGAAGGGACGGTAATGGTATGATGGATGGAATTTGGGGAGGAACTCTGCCTCTCTGAATTAGCAAACCTACTTGCTTTCTCTTCGATCTTCACTAACTAAATTGGAAAAAATAGTAAAAAAAAACATGGGAAAAGAGAGACTCACTGATTAAGGTTCTGGGCTGGGTTTTTTTGTTTTGTCATTTACGCATAGTTAGGTTTTCTGGGTATCAATGCCCTTGTGAAGCAGCAAATGGTTTCATGAAAATGCTAAGCTGGTTAAAGCAGCTGTTTTGGCTTTGGGCAAGTAGAGGGGGTTGATCAGATATAGATCTCCTCGAGGATATAAATTATACATGACCAGAGTT…
Isoform_362	AGAGAGAGAGAGATGGTTGGAAGGGACGGTAATGGTATGATGGATGGAATTTGGGGAGGAACTCTGCCTCTCTGAATTAGCAAACCTACTTGCTTTCTCTTCGATCTTCACTAACTAAATTGGAAAAAATAGTAAAAAAAAACATGGGAAAAGAGAGACTCACTGATTAAGGTTCTGGGCTGGGTTTTTTTGTTTTGTCATTTACGCATAGTTAGGTTTTCTGGGTATCAATGCCCTTGTGAAGCAGCAAATGGTTTCATGAAAATGCTAAGCTGGTTAAAGCAGCTGTTTTGGCTTTGGGCAAGTAGAGGGGGTTGATCAGATATAGATCTCCTCGAGGATATAAATTATACATGACCAGAGTTCTGTTGATCAAGCTGCATGATATATCTATCTTAT…
Isoform_36251	TTCAAAGTATCTCTCCCTCAAGAGTTGGTTCAAGAGGGTAAACTAAAAGAGGAATGCTTTGCACAGCTTCACAGTGCATCAGCCACACCATGCCCTGCCCACAATGGGCTGGAGGCATCAAAGTTGGTCTTGAAATCCACCTTTGAAGAACTTTGGTCATCCTATGTTCCCATTCCCTCCAATATATAAGAAGCCTTGCCCTCCAATACCAATCTATAAGGAGCCACTTCCACAACCGGTACCAATCTATAAGGAACCACTTCCACCACCTATTGAACTTCCACCGCCTATCCCAAAGATCGAAAAACCACTTCCACCACCTATTCCAAAGATTGAGCCACCGCCGCCTATCCCTAAGATCATAAAGCCGCTTCCACCACCAATCCCCAAGATGAAAAA…
Isoform_36429	ACTCAACCCTTGATTCATCTTCATTACCATTCTCTATACATAATTGGGAACCAGAAGGTGGGTTCCCAATGAGGATTCGTCCTGTTTGTCCCGGAACACTTCTGGGTTTCTGGGTATGTTTAGTACTGCTATTCTCTGTGAGCTTTTGCCATGCAGATGACAAATCAGTTGAGGTAGTTGGTTTTGGAGAATGTGCTGATTGTTCCCAGAGTAAATTTAAGGCTAGCCAAGCTTTTTCAGGACTACGCATAACAATTGATTGCAAGTCTAAAAATGGACACTTTCAAACAAGAGGTACTGGAGAGCTGGATAAACAAGGAAAGTTCAAAGTATCTCTCCCTCAAGAGTTGGTTCAAGAGGGTAAACTAAAAGAGGAATGCTTTGCACAGCTTCACAGTG…
Isoform_3650	AAACTACTCGGCAGCAAAACCTCGATAAAATCTACAGATCAACTCGCTCGCGTCTTTTGGCTATTTGGATTTCAGAATTGGATCTTCATCTATTCCATGCCCTTAAGATTTTAGCGTTATTTATAGGGTTTTCCTTTACATCAATTATTTGTACAATTTTCTTGTTTTTATCCTCCTGGGGATTGGAAATCGATGGATACTAGTAGTTGGAGGTCTGGTCAAGCTGAACCACCTCCCCTAGATGGTGGCGATTGGAGGAGTGGGCTGCAACCTGAACACCGCCAAAGAATTGTGAACAAAATGTAAGTTCTTTTTTAACCTCTATTTTCTCTGAATTTTAAATATCAATTCGAATTGTGAAAAGTGTGTAACTTTTGTGTACTTTGTGGTGTCAAAAGT…
Isoform_36869	GGTTACGCCCTCTACACCGACCTTAAAGTCTCCGAGGTCGCAACCCTTTTCCAAATCGACCCCATTTCTCTTCTCACCGCCAACGCCATCGACATCTCTTACCCAGACGTTGAAAACCACATCCTCCCTTCCCAACTCTTCCTCAAAATCCCCATCACTTGCTCTTGTGTCGACGGCATCCGCAAATCCGTCGCCACACGCTACAAGACCCGCCCGTCCGACACACTGTCGACAATCGCCGACACCATTTACTCGGGTCTTGTTTCTGCTGACCAGCTTGGGGAGGCGAATTCCATATCGGATCCTTCGTTTCTCGATGTGGGTCAGACCCTTGTGGTTCCGCTCCCCTGTACTTGTTTCAACGGGACGGATAATTCGTTGCCCGCCGTTTATATGTCG…
Isoform_36958	AATTCACTCAACCCTTGATTCATCTTCATTACCATTCTCTATACATAATTGGGAACCAGAAGGTGGGTTCCCAATGAGGATTCGTCCTGTTTGTCCCGGAACACTTCTGGGTTTCTGGGTATGTTTAGTACTGCTATTCTCTGTGAGCTTTTGCCATGCAGATGACAAATCAGTTGAGGTAGTTGGTTTTGGAGAATGTGCTGATTGTTCCCAGAGTAAATTTAAGGCTAGCCAAGCTTTTTCAGGACTACGCATAACAATTGATTGCAAGTCTAAAAATGGACACTTTCAAACAAGAGGTACTGGAGAGCTGGATAAACAAGGAAAGTTCAAAGTATCTCTCCCTCAAGAGTTGGTTCAAGAGGGTAAACTAAAAGAGGAATGCTTTGCACAGCTTCA…
Isoform_3701	GAAGTTTCTTTCTACCACCTGATCCTCACTTCGTAATAGGAACAGAGCTTAAAAGTTCAAACCCCTTGTCCAATTTTCCATCTTCTTCAGCTGCAAAAAACTAAACAAACCATGTCAGGTGATAAAGTTTCGCATTATGATTGTGGTACTTTGCTTCTTAACATAAGTACAAGCACCCTCACCATAGCCCAAAAGCGATGGCGAACAGCTTACGCTACGATCTACTCTATCCGGGTCATGATTTCTATTGCCAATGAAATTGTATCCAAGAAGAATAAGGGCATCCCACACTCTCATCCATACACTATCCTTGATATTGATCAACCCAGCACTTCTACACAAGATAATAACGATACCGATACCGTGCCTCGACAAGGTTATTCCGACAATATCAACCAA…
Isoform_37096	TTATTTTTTTTTTTTTTTTTTTTTTTTAAGTATATTACTTCTATCCTACCGTATAACCACACACTTTCAGTTTCAAACCTGAATTTTTATCTTCCTAGCCACCTACACATACACCACCATATTTTTTCCTTACAAATATTCCTTACTGTCACGACCTTACAATATCACTTTTCTTGCATCCCCTTTCAATATCGATTTTCTTACGTTTACTAAATTTTTGAATCTGATTTTTTATAGGGTGATGTTACGTACATCCACCACTTTGTCACTCTCATCCCACAATCATTGGACGAAAAATACTCTTTTATTTTTTATTTTGTATATCACACATTTTTAGGTCTTTTTTTAATTTTAAAAATAATAAGATAATAATATATTTACATACTCTATTTACACATC…
Isoform_37161	TTTTTTTTTTTTTTTTTTTTTTTTTTTGTAGCTAAACAATTTATGTCTTTTAGGTAAAATTTAAAAAGTTGGTTGATGTGGATGTTTGCTATCTTATTTTTTCATCTGTCAAATAATGTAAGTATTTTATTTCTAATTTTTTCATATGAATTAAATCTTTCTCCAATGCACGTAGGAGAAATAACATGAGATAAACAAATAACAGTCATGTGCTAATCTTATTTGCAAATTCTAACCATGATAGTCATAGGAGAATTTAGTACTAATATCACTGAACTTAGTTTTCTCAAATGCGTGGGTGCTACACTTATTTGCTAATTTTAACAAAGTGGGTGTTTATGATAGTTAAATCTCAATAGAAAATAGGGTTTTAAGAATATTCACTCTACCGTAATATAT…
Isoform_3717	CGTCTTGTCCAAATTAGAGCAAGACCATTTATTTATATGCACACATAATTACAAGAGAGACTAAAATACCCTTGGGCTTAATCCAGGGCAATACAAATGGAATAATAAAAAACAAAAGGCCCATTAAACTACGTATTCCAACACTCCCCCTCAAGCTGATGAGTAGATATCTACGAGGCCAAGCTTGCTAATAGAAGTTCCTTAACAATGAAGGTCCCACTGGCTTAGTTAACATATCCGCCATCTGGTTCTTGGAAGGAACATAGAAAGGAGAGACAATACCATTACGAATCTTCTCTCGAATGAAATGAACATCAACCTCAATGTGCTTAGTCCGTTCATGGAGTACGGAGTCAGATGCAAGCTTGATGGCTGATTGATTGTCACAAAATAGTTTGG…
Isoform_3724	TTTTTTTTTTTTTTTTTTTTTTTTTTTCATTCCGGTTCGTTAGAACCTGCCATGCATACATCTATAAAAAAAACTCTCCACAAACTGATTTATTTTTTAATGGAATATATCTATTGCCTTAATATGCTGTTTGAGCTTAAAAAGAAATTTTCTTCACCAGCTATAGTGGAGTGCAACCTTCCAGCAGCCCAACCATTATTCATTACACGAACAGCAGCACGCGCTGGATCCCCAGTAGCACGGCTACCCTCAACTTGCTTATCAAATTCCGGTAATCCACTTGCCTTTCTCTCTTTTCTTCTCTTCCTCTCTCCTCTCTCCTCTCTCCCTCCCAAACCCCTTAATCCAAACACTGTAAATGAGTGGAGTACACGAGGTTAAGTGCACGCTGGGCACATG…
Isoform_37410	ACACCTCTTTTCTACTCTCTCTCTACAGAGTGATAGAGAGAAAGAATGGAACTCATAATGGCAATTCCTCTCTTAATTCTTTTCCTCTTACCTCTTGTATCTCCCACCCTCACATCCCCCACTTCACCAGTTCAAGATCCTGAGCTCGTAGTACAAGAAGTACAAAGAAGCATCAATGCCTCCAGAAGAAATTTGGGCTTTCTTTCTTGCGGGACAGGCAACCCCATCGACGATTGCTGGCGATGCGACCCCAATTGGGTAAAGAATCGCCAGCGGTTAGCCGATTGCGCCATTGGCTTCGGCAAGCATGCAATCGGCGGTAGAGACGGTAAAATCTACGTCGTGTCCGACCAAGGCAACGACGACCCTGTAAATCCTAGACCAGGAACTCTCAGACAC…
Isoform_375	GAGCATTCTTTTACGCAATCACTCCGCAGTGTCGCCTCAAATTCCCGCCAAACATTTCCCGGAGTTTCCCTTGAATTCCCGCCATCGCAGAGTATTTTCAAGGCTACTCCGCTCCCCTTCACTATTCACACCTGTTCTTTCATTTCTTCTCCCCTTCTCTTCTCTCCCAATTCTCTTCTCCTCCCTGAACAAAAAACTCATTCCAATGCCTCCACTACGTCGCCTCAGCAATGGCCGATCACCACTGGTCAACCAACAAAGTCAAATTACATCCTTCTTCACGAAGACACCATCTTCTCCTTCGCCTTCACCGTCTCCTACCCTTCTTAAACAAAATCCCAAACCTAACCCTAAGAGTAACATTAGCCCCAGTCCCAACCCTAGGTCTAGCCCTAGCCC…
Isoform_37552	AGACACCAAAAATGGAAATGGGTTCGAGCGTTTATCGGTCTCCACCCAACTCGTCCGAGTCACTCAACGGGTTGAAATTCGGTCAGAAAATATACTTTGAGGATGTGGGTATTGGAGTTCCGGCTAAATCCGGCGGTGGGTCGTCTTCCTCTTCCGGCTCCGGCGACCTACCGCCGGCGGATGTGCCAACGAAGAAGGCGAGGGGTGGGGCTGGGTTTTCGCAGGGAGGCCAGCCGCCGAGGTGTCAGGTTGAAGGGTGTAAACTGGATCTCAGTGATGCTAAAGCTTATTATTCGAGGCATAAAGTTTGTGGGGTGCACTCAAAGACACCGACAGTCATTGTAGGAGGACTTGAGCAGAGGTTTTGCCAGCAGTGTAGCAGATTTCATCAGCTTCCTG…
Isoform_37605	aAATGTGTCTGATGCGTATACCATCAACGGTCAACCAGGCGATCTATATAGATGCTCCAAAAAGAAACACTTAAAATTTCGGTGAAACCTGGTGAGACAATTCTCTTGAGACTCATCAACGCTGCACTCAATCAACAACTCTTTTTCGCCGTCGCCAACCACAAACTAACAGTTGTCGGTGCGGATGCTGCTTACACCAAGCCTTTCACAACCAGAGTCATGGTGCTTGGACCGGGTCAGACAACCAACGTCCTCGTAACAGCTGACCAGCGCCCGGCTCGCTACTACATGGCAGCACGTGCATACGCCAGTTCCCCCACTGTGCCCTTTGATAATACCACCACCACCGCCATTATCAAATACAAAAAGGGAGTCCGTTCAACACCAATCCTCCCACGG…
Isoform_37689	GCACTCATGTCTCTGCAGCACTCAAGCGTCGCGGGGATGGCGTGCTCGGCCTCGACAATTTCAATGACTACTACGATCCATCGCTGAAGCGTGCCCGCCAGGCTCTTCTTGAGCGCACCGGAGTGTTCATCGTGGAGGGCGATATCAACGATTCGGCGCTTCTCCGGAAGCTTTTCGAGGTTGTGCCGTTTACCCATGTGATGCATTTGGCAGCCCAGGCCGGTGTGAGGTACGCTATGGAAAATCCGAGCTCCTATATTCATAGTAATATCGCTGGTCTTGTTAATTTACTTGAAGTATGTAAATCGGCGAATCCACAGCCTGCAATTGTTTGGGCTTCCTCGAGTTCGGTGTACGGACTCAATACCAAGGTACCCTTTTCGGAAAAAGATCGAACAG…
Isoform_37791	ACTCAACCCTTGATTCATCTTCATTACCATTCTCTATACATAATTGGGAACCAGAAGGTGGGTTCCCAATGAGGATTCGTCCTGTTTGTCCCGGAACACTTCTGGGTTTCTGGGTATGTTTAGTACTGCTATTCTCTGTGAGCTTTTGCCATGCAGATGACAAATCAGTTGAGGTAGTTGGTTTTGGAGAATGTGCTGATTGTTCCCAGAGTAAATTTAAGGCTAGCCAAGCTTTTTCAGGACTACGCATAACAATTGATTGCAAGTCTAAAAATGGACACTTTCAAACAAGAGGTACTGGAGAGCTGGATAAACAAGGAAAGTTCAAAGTATCTCTCCCTCAAGAGTTGGTTCAAGAGGGTAAACTAAAAGAGGAATGCTTTGCACAGCTTCACAGTG…
Isoform_3781	AATTAAATAAAAAGCAATTACTAAATCTAATCCTATCCTAAATAGGAAAACAAAATAGAAAATAACTAAATTACTAAATCTAATCCTATCCTAAATAGGAAAACAAAATAAAGAAAATAATTTTAGGAATTAGTTACCGTAGCAAATTCATGTAGCACCGACACTGTTCACGGGTACTATTCACCGACACTGTTCACGGGCACTGTAGCATCTGTCCTATATTAGATCCACCTTTCCCTCAGAAAATTCGACATCGAATTTTGATATTGTTGTAGTTCGTCTTCACCATTATGGTTGACCACTTCCATCCTGCATCCTCCCTTTCTTGGTCATCCTTTGCATGTTGATTTCTGCCCCTCCAAATGATAAGATATTTTAAGTATTTTGAAAGTTTTTGTT…
Isoform_37921	gttGTGGTATCAACGCAGAGTACATGGGAGCGCCGTCGCGAATGGGCTGGCGGGAGCCGGTGGTGGTATTATTGCTCAGATTGTTACTTATCCTCTTCAAACGGTGAATACGCGCCAACAAACCGAGAGAGTCGCAAAGAAAGGCCTTGTCACTTCAGGTGGGAGCTTGCCTTCCTCCAATCGGCCAGTAGGTGGCGCGCTTCTTCAAATCATGCAGGTCATAAGAAGCGAAGGTTTGGGAGGACTTTATAGTGGCCTCAAGCCTTCTCTGCTTGGAACTGCTGCTTCACAGGGCATTTATTACTATTTTTATCAGGTTTGCAAAAACAAGGCTGAAGCGATTGCAGCTCTGCGTAAAGTCAAAGGAAATGGAGATGGCACTGTTGGCATGTTTTCTTG…
Isoform_37958	AGAGTGATCGGTATGCTCCGAGTGTCGGCGACAGCTTGCCGGATTCTGTTGATTGGAGGAAAGAAGGTGCCGTCGCTCCGGTCAAAGATCAAGGAAGTTGTGGAAGTTGCTGGGCTTTCTCCACCATTGCTGCCGTGGAAGGAATAAACAAGATAGTCACTGGCGACATGATCACTCTATCAGAGCAGGAATTGGTTGACTGTGATACATCCTATAACGAAGGTTGCAATGGAGGTCTCATGGATTATGCCTTTGAGTTCATCATCAACAATGGTGGCATTGACAGTGAAGAAGATTACCCTTACCTCGGTGTTGATAGCAGATGTGACCAGTACAGGAAAAATGCCAAGGTTGTTACCATTGACAGCTATGAAGATGTGCCCCAGAACGATGAGAAGG…
Isoform_37991	CATTAGCCAGGGCGCTTTTTGTACAACCAACTCTTCTATTACTCGATGAACCCACCAATCATCTCGACCTCCGTGCCGTTCTCTGGTTAGAAGAGTATTTGTGTCGGTGGAAGAAAACTCTGGTAGTTGTCTCACACGACAGAGACTTCCTCAACTCAGTCTGCAGTGAAATAATCCATCTCCACAGCTTGAAACTCCAAGTCTACCGTGGGAATTTCGATGACTTTGAAACTGGTTATGAACAGCGTCGAAAAGAAGCAAACAAGAAGTTTGAAGTCTATGACAAGCGAATGAAAGCTGCGAAAAAATCAGGGAATCGCACTCAGCTAGAAAAGGTCAAGAATCAACAGAAATTAGCTGCAGCTAAAGAGGCATCCAAAAATAAAGGAAAAGGCAAGC…
Isoform_38	TTTTTTTTTTTTTTTTTTTTTTTTTTTCAGCAAGATAGGAGGGGCCAAGTCCCAAAGTGCAGCCGCCCTTTACGAGGCTGCATGGACCCCCTCCGGTGCAAACTCTCTCCTCTTTCTTCTTCTTCCTTGTTGCTTTATTTCTCTTATTTTCTTCTTCTACATAATCTCTATCAGATCTGAGCAAGGTTTGAGGGGATTAACCAAATGCAACCACTCTGGTGCAAAACCCCCTTTTCCTTCTTTCTTTTTCTTTATTTCTATTTCTTTCTCCTTCTGCACTAATTATATCAACTTCGAGCAAGGTTGGAGGGGCTAAGGCCAAAGTCTAGTCACCCTTTACAAAGCCCTCTCTGGTGCAAGACTCCCTTTTTTTCTCCTCTTTTCTTCTTTCTTCTTTCT…
Isoform_38138	AAGACAGTGTTCAAGGGGCATGCTTGTCAGGATTTTTCTTCACTCCCGTGGCTCCAGTCCTTTCTTACTTATAAGCTAGATCTGAACCAAAGGAAGATTGAGAACCATCCATAAGAAATATATCAACATGAGTGGTGGTCGGGGTGAAAATACGTTGCTTCTTGCTCTCCAGCTGGCACTACTCTGCCTGCTCTGTATTCCTTCTATTCTCGGCAATTCAGCCCACGGCTCACAAGCTGGAAGGAAGCTTTCCACTGAAATTAATCCTGGATTCATAAGCATCGATTGTGGTGTAAATGAAGACTATTACGACCAGAATATTGGTATATATTACAAGTCTGACATGGAATTTATAGATACCGGGAAGAACATGCCGGTAGCAGAATCCAGCTCTCAAAA…
Isoform_38183	ATGATAGAGTGGTCCAACAGAATTCGTATGGGCATGTGAGATCTGAGAGGTGATGAAGAAATCAAGTGTACATGTCCTGTCATGCTTTTCCACAGCTTTCTTGAACTTCTTCATCTGTTCAATCTCTTAAGATTAATTGTAATCCATAGAAGCTCAAGAATGCTGTGGGAAAACATGGCTATTCAGGATTTTGATTTTGATTTTGCTTTTGCTTCTGGTTCTGTTTCTATCCATATTCCCATCTCATATAAATCAATATTCAAACACCTTAGTTTTTTTTTTTTAATCTTTTTTGGGGATCTCAGAATTTTTGGTTTTTGTTATGAGGCATGAATCGGTGCTAATCTCATATATAATTGAAACCCAACTCATCATACATAATTTTTGTCAGATTCTTTT…
Isoform_38355	AAACGAAAATACATTTATCTCAAAGGGGGAGGAGGAAGAAATCCACCACAATGTCTGTAACCACAACCCCTACCGCCGCCGCCGCCGCCGCCATGGAAAGGCAGACCTACTGGTGTCACGAGTGTGATATCAGCGTCTCTCTCCTCGTATCCTCTGGCAACGACACTCTCCTCTGTCCTCACTGCCACAGCGACTTCCTCGAGGAAATGGAGTCTTCCCTCCCCATCTCCCCTAATCCTAATAATTCGCCCTTTCCCATTCTATCTCCTCCTCAAACCCTACCGTCCCCTGCTATCAGTCCGGAAGATCTCGTCATTTCTCAACTTGCACCTACCGCCACATCCGACGACAATTACCTCCTCGACAGCCCTTATCTCCAGCGTCTCATCCAACACCTCT…
Isoform_38379	GATCAAATAAAAATCAGTTCCCTTCTTTGGGTTCCGATCGTACGTTCTCAGCTCCAGATTTATTCGCAGTGGTCTTTCGCCTGTGCTTCATGATCTCTCCTTCAGATTTTTCAATATTCATCGGATCTACTTTGATTTGTTGATTTCGAGCAATTCGTTTCTCTTTTGGGTTGGAGGAGCGACCAGTGTCAGGTTATACCCGTAGTAATCTGGTTTGGATCAGATCACATCGCCAGCAGTTGTTTGGTTCGTATCTATGATCGTGGATCTCAATCATATCACTACTGGGTTGGTTTGGTCTTCGGTCAAATCAGTGCCTTAACTGGTTTACGAAAAGGGTTCTGGCTATTCTTGGGTTCAGACAAAAATGATCTCTGATCTGTTCGTGATCAGGTTCGA…
Isoform_38509	ACTCAACCCTTGATTCATCTTCATTACCATTCTCTATACATAATTGGGAACCAGAAGGTGGGTTCCCAATGAGGATTCGTCCTGTTTGTCCCGGAACACTTCTGGGTTTCTGGGTATGTTTAGTACTGCTATTCTCTGTGAGCTTTTGCCATGCAGATGACAAATCAGTTGAGGTAGTTGGTTTTGGAGAATGTGCTGATTGTTCCCAGAGTAAATTTAAGGCTAGCCAAGCTTTTTCAGGACTACGCATAACAATTGATTGCAAGTCTAAAAATGGACACTTTCAAACAAGAGGTACTGGAGAGCTGGATAAACAAGGAAAGTTCAAAGTATCTCTCCCTCAAGAGTTGGTTCAAGAGGGTAAACTAAAAGAGGAATGCTTTGCACAGCTTCACAGTG…
Isoform_38517	TCGATCATTGACAAGTAGCTGGGAGTCCCAGCTGATGCCTGCTCTGGTCGATAATCGACCAGGCTGGTCGATAATCAACAAGAAGCCCGATAACAATTTATAATTTCGTTTTCTATTCTAATTCACTTAGGACCTGTTTTCTTTTCGGGGCAATTACCAATTGCACTCTATATAAAGGGTAGCCATGACCCTTTAGAAACATTCAATGGTAATCTAATTGTATTCTTTAGACAAGAGAGAGTGTGAGACTCTAATATTTACAATTTTAAAGCTGTGAGAGCTTAATATTCTGTGAGAGAATAGTTTAGGAGATTATTGTTGAGAGAATAGTCTTCTTTTGGAAGTCTTTTGGAGGATTGTTGGCAAGCAACAACCTCAAGCGACCAATTATCATTGTCT…
Isoform_38621	aTTTTCTTCTTTTTCAGGCTCCACATTTTCTCTCTCTTGAATTTCTATTTTTGTGTGTATCTTTTTTTATTTTTTTTATTTTTTTTTTCAGGTATTCCCTCTCTTGTTCGTTTACAATCTCAAATTTGTTTTCTTTTCCTTTGTTTTTTTAGTTTTGTTACCCAATTATCTTCGCCTTACACTCTGTTACCGAGTTTTATTTGAAGGGAAAGGAGAGGAAAAGAAGGGATTTTATAAAAAAAAATTTGTTACCAAGTTTTAAGTGAAGGGAATGGAAGGAATGGAAGGATTTCATATCCTTCATAGTGGTGGGGCTCACAACTTTTGGTTTCTTCCCAAAAGTGGGTGGAAAGGGAAGGGGGGATGACTTTAATAAAAAAATTAATATTTCCAAATTAC…
Isoform_3904	AAGAATTCCTAATATGAATTTTGGCATTCAGAAAGAGGAGCCTTAGGAAGAAGTTGATTGGTGAAAAGATAATATCTAAAATGTCTGAACACGAAGGGAAGGCTATCACAGCAGATGTCACTTCAGGAAATATGGTTTTCCAGCCTATCTTGAAGGAAGGGATTTTCCGATTTGATTGTTCTGCAAATGATAGAGATGCAGCATATCCCAGTCTTTCTTTTACTAATACCAAAGATAGGGACACACCAATTGTGAGTCACAAGCTTCCTGTTTTTACCCCAACTTTTGAATGCCTTCTTGGGCAACAGATCGTTAAAATTGAGCTTCCTGGGGTTTCTTCCTTTTATGGAACTGGAGAAGTCAGTGGACAGCTTGAGCGGACAGGGAAGAGAGTTTTTA…
Isoform_39104	AAAAATGTTGTTTTATATACTAAGTGGTATAATGTGATTGTTGGGTTTTGCTCTCGCTCTCTGGTAAGGGTTCTTTGTTCTATATGTTTTCTGTGGAGAGTTCCTATTAATATGGGATCAACTTCCATGAACAGATAACAAATAACTTCTCTCATAGTTGTATCTTTTCTTTGGATTATAATTGTGATTGGTAATTCAATTATAACACTATTTCATAATTGTGATCGGTAATTCAATTATATTGTTCCTTTGGAAATATTTAATTATATTTTCTTACAATAATTTATTAGTTTTTATTGTATAAAATTTTGAATCATGTTGTTGTAACTCTTTTGCAGTGAAGGCGGAAAGTTCAATTGGTTATATTACTTTTACGGTTTCAGCTTCTATATATATTCT…
Isoform_3950	GAGGATTGAGGCACTTTTACTGCTTTTTTATGTTGCACGCATCCACAGGCAGAATACATGGAAGGAAGACAAGGGTACTCTTACAAAGGACACAGCCAAGAGAGAAGTGAGGATTGCGCATATGGGGTTGAAGAAATATCACCACAAAACAGAAACAGTGTGAGTGATTTCATTCATTGGAGACAGAACAAGAAGCGGTGTCCTCTGTAATGGGTTTTGCATGCATTTTCTCGAAGGGCAAAGCTCAGACATATTAAATCTGCTTTGAATGATTTTGTTTTATTCATTAATAGCTCTTGTTCAATTAATTGCTTACAACTTTTTTGAAGTAAACTCCACTTGTTTTTATTGTGCTTCATATTTTGTACATATCTGGGTATATTGAAAGCTGGGGAGAGA…
Isoform_39607	AATTTCAATTCTCTTATTCTAGGGTTTCAATTCTCCCTCGATCTCCTTTTTTCCGACGGGGTTTTTCGTTTTCGATCTCGATCTCGATCTCAATAATGTTTCAGATCGCGCATCCGGTAGATGTGAAGACGGGTAGTCCAGCTTCTCTCGAGAAGTTGACATCGAGGCAGTTTCAGGAGAAGAAAAAGCCTTGTCCACCACCAACCCCAAAGATTGAGAAGCCACTTCCACCACCTATTCCAAAGATTGAGCTACCGCCGCCTATCCCTAAGATTGTAAAGCCGCTTCCACCACCAATCCCCAAGATCAAAAAGCCATGTCCACCACCAACCCCAAAGATTGAGAAGCCACTTCCACCACCTATTCCAAAGATTGAGTCACCGCCGCCTATCCCTAAGA…
Isoform_39695	ACTCAACCCTTGATTCATCTTCATTACCATTCTCTATACATAATTGGGAACCAGAAGGTGGGTTCCCAATGAGGATTCGTCCTGTTTGTCCCGGAACACTTCTGGGTTTCTGGGTATGTTTAGTACTGCTATTCTCTGTGAGCTTTTGCCATGCAGATGACAAATCAGTTGAGGTAGTTGGTTTTGGAGAATGTGCTGATTGTTCCCAGAGTAAATTTAAGGCTAGCCAAGCTTTTTCAGGACTACGCATAACAATTGATTGCAAGTCTAAAAATGGACACTTTCAAACAAGAGGTACTGGAGAGCTGGATAAACAAGGAAAGTTCAAAGTATCTCTCCCTCAAGAGTTGGTTCAAGAGGGTAAACTAAAAGAGGAATGCTTTGCACAGCTTCACAGTG…
Isoform_39866	TGTTCTTGAGCTTTTGAGCCTCAAAAGGGTGCAATCGTTTCAACTGGGGAGGGAAGAAGTAGTTGCAGAATTGATTCAGAGCATACGATCTTCTTGTGCCAGTGGAGCTTCGGTTAATCTCAGCGAGTTGCTACATCATACGTCTAGCTGCATAGCTTCGAAAGTTATTATTGGTCCGAAATTTGAAGATGGTGAGGAAAATTTTGGTGCGTTGGCCCAGAAGGAGACACAGCTCTTGGGAGCTTTTTGCTTTCAAGATTTTTTTCCTTCTTTGGGATGGTTGGATGGTGTCACTGGATTGACTGCAAGATTCAAGGAGACTTCAAAAGAGTTAAATTCTTTCCTTGATCGGGTGCTTGATGAGCAATTGAACACAAAGAGTAGTGGTAATGACCAGTC…
Isoform_39889	AAGGAGCCACTTCCACCACCGGTACCAATCTATAAGGAACCACTTCCACCACCTATTGAACTTCCACCGCCTATCCCAAAGATCGAAAAACCACTTCCACCACCTATTCCAAAGATTGAGCCACCGCCGCCTATCCCTAAGATCATAAAGCCGCTTCCACCACCAATCCCCAAGATGAAAAAGCCTTGTCCACCACCAACCCCAAAGATTGAGAAGCCACTTCCACCACCTATTCCAAAGATTGAGCTACCGCCGCCTATCCCTAAGATTGTAAAGCCGCTTCCACCACCAATCCCCAAGATCAAAAAGCCATGTCCACCACCAACCCCAAAGATTGAGAAGCCACTTCCACCACCTATTCCAAAGATTGAGTCACCGCCGCCTATCCCTAAGATTGTA…
Isoform_40228	CCGCTCGCGAAAAGGTGCATGACCGTTTACCAAACCTACATCAACTCCATGAATGAGAGGATCCGGAACCAGGTTGCAATTTCAAACCCGTTCGTCTTCAAACACATCTCATCGTTAAATAGTATCGAGAATTTCAAAGATGTCGGTCCGTCAGTTGTTATGGCAAGTCCAGGCGGGCTTCAAAGTGGATTCTCGCGACAATTGTTCGACAAGTGGTGCTACGATAAGAGAAATGCGTGTATCATATCCGGGTTAGCCGTTGAAGGAACGTTAGCCAAAACCATTCTAAGCCAACCGACGGAAGTAACTCTTTCAAACGGTCTCAACTCTGCACTCAATATGTCTATCCATTGCATTTCCTTCTCAGCCCATGCTGATTTTAAGCAAACGAGCGCCTTC…
Isoform_40350	AATGGAACCCCTTTGTAGCCAAGCTTTCGGTTCGCGAAATTTATCTCTTACTTGCTAATTTTACAAAGAACAATTCTCATGTTACTCTTTGCCTCTGTACCCCTTGGATTACTATGGCTAAACCTTGAACCTCTCATGCTTAGACTCCATCAAAACCCAGATATTATCCGAGTTGCTAGCCTTTATTGTAAGTTTGCCACCCCTGATCTCATTGCCAATAGCTTCCTTCACCCAATACGTATTTACTTACGTAGTAAAGGAACAACATGGCCTTTGATGTGGTGTAGCTTTCTTGCAATTCCTCTTTCATCTCCCTCTCACCATTTTCTTAACCTTCAAGCTTTCTTTTGGGATACTTGGTATTGCTATCTCCAACTTTGTCACCAATTTTATCACCCT…
Isoform_40754	AAATAGCCGGAGAAGAAAACACTCCACCCGGTCAGAACTAGTTTTTCTTCTCGATGGAACTCAACGATGTCAAAACGTTGTCGTTGATGTCTAATTTTCTCCGGCAATGCGGCGGCGTAGCTGTCGTTGACGGTGGTTTCGCCACTGAACTCGAACGCCACGGCGCTGACCTCAATGACCCCCTCTGGAGCGCCAAATGTCTCCTTGATTCCACTCACCTCGTTCGTAGGGTGCACCTTGATTACCTCGAAGCTGGTGCAGATATTATAATCACGGCATCTTATCAGGCTACCATTCAGGGTTTTGAGGCTAAAGGCTTCTCTACAGAAGAAAGTGAAGCCTTGCTAAAAAAAAGTGTAGAAATAGCCTGTGAAGCACGGGATATCTATTACAACAAAT…
Isoform_40880	CTCTCTTTCCTCCCTCTGTCTCTATAAATATAGAGGAGAGAAACACATCAAATTTCACTTACAATTTTCTCCAACAACAAAAAAACACCAGCAAAATCGAGCAAAGAGAGTATAAAGCACAAAATGGCAACAAGATTGAGCATGGTGGTTCTTGTAGTAATGGCACTAGCCGCTCTGTTACAGAGCTCCACCGCACAAACCACCCATGTAGTCGGAAATTCCTTGGGTTGGACCATTCCGCCGGGCGGCCCCATTGCTTACTCCACCTGGGCTGCCCAAGAAACGTTCACCGTCGGCGACATTCTTGTGTTTAACTTCACTGAAGGAGAACACAACGTGGCCAAAGTTACAAAAGCAGCATTCGATTCATGCAACGGTACCGCTCCCATATCTCTCATT…
Isoform_410	ccctaCCAAACACTCTAAATGAGAATATAGGGAAAACAAAGAGGAAAAGCTGAAAGAGAAATAGATAATATCGAGAGAGGAGAAGAGAAAGTAAGGGGCGGGGGCTTTGTGTATGGTTTTTATTCAGATGAAATCCCAGCAGCTGTAATTGCCGATTGATAATTGACCGAGAGAGCGAGCTAGGTTACGGCAATATGGCGGAGCAGAGGAACAGATGGAACTGGGAGGTGTCTGGGTTTGAACCAAGGAAGGCGTTCGAGCAAGATGATCACAAATCTTCTCATCTTGTCCGGAGGTACTCGATTTCTTCTCCTTCTTCGGCTTCATCACATTCAGAGGTATCGTCCAAACTCGGTTTGGAATCCAAGTTTCAGAAACTGAGGGATAAAGTAAAGCTTG…
Isoform_41188	ACTCAACCCTTGATTCATCTTCATTACCATTCTCTATACATAATTGGGAACCAGAAGGTGGGTTCCCAATGAGGATTCGTCCTGTTTGTCCCGGAACACTTCTGGGTTTCTGGGTATGTTTAGTACTGCTATTCTCTGTGAGCTTTTGCCATGCAGATGACAAATCAGTTGAGGTAGTTGGTTTTGGAGAATGTGCTGATTGTTCCCAGAGTAAATTTAAGGCTAGCCAAGCTTTTTCAGGACTACGCATAACAATTGATTGCAAGTCTAAAAATGGACACTTTCAAACAAGAGGTACTGGAGAGCTGGATAAACAAGGAAAGTTCAAAGTATCTCTCCCTCAAGAGTTGGTTCAAGAGGGTAAACTAAAAGAGGAATGCTTTGCACAGCTTCACAGTG…
Isoform_41591	ATTCAACACAAACCGCTTCTCTTTGTTTCTCCATTCATCAATCATGGTTCCAGAATTGGAGAAACCTAAAGTAACAGAGATTCTAGTCCGTATGGACTGTAATGGGTGTGTCCAGAAGATCAAGAAAGCACTCCACGGCATTAATGGTATATATGATCTCTACATCGATTTTCCTCAACAGAAAATAACCATAATTGGTTGGGTTGATCCTGAAAAAATAGTCAAAGCTATCAAGAAAACAAGGAAGACCGCTACTATTTGTGTCCACACCGAACCAACAGAACCATCACCACCACCACCCCGAAGGTGAAGCACCACCTCCTGCAGAAAACCCTCCCCCACCGGAAGTTCCACCAGCTGAACCAACGCCGCCGCCGCCGCCTGCTGAGCCACAAAAAG…
Isoform_41643	GCCTCACTTTAAGTACCCGCCGCTACCCAAATTCCCACCCTTGCCCACAGGTCACCCATGGCTTAAGCCATTTCCTAAAGTTTACCATCCACCTTTGAAGAACTTTGGTCATCCTATGTTCCCATTCCCTCCAATATATAAGAAGCCTTGCCCTCCAATACCAATCTATAAGGAGCCACTTCCACCACCGGTACCAATCTATAAGGAACCACTTCCACCACCTATTGAACTTCCACCGCCTATCCCCAAGATCAAAAAGCCATGTCCACCACCAACCCCAAAGATTGAGAAGCCACTTCCACCACCTATTCCAAAGATTGAGTCACCGCCGCCTATCCCTAAGATTGTAAAGCCGCTTCCACCTCCAATACCCAAGATCAAAAAGCCATGTCCACCACC…
Isoform_41772	ACTTACAATTTTCTCCAACAACAAAAAAACACCAGCAAAATCGAGCAAAGAGAGTATAAAGCACAAAATGGCAACAAGATTAAACATGGTGGTTCTTGTAGTAATGGCACTAGCCGCTCTGTTACAGAGCTCCACCGCACAAACCACTCATGTAGTCGGAAATTCCTTGGGTTGGACCATTCCGCCGGGCGGCCCCATTGCTTACTCCACCTGGGCTGCCCAAGAAACGTTCACCGTCGGCGACATTCTTGTGTTTAACTTCACTGAAGGAGAACACAACGTGGCCAAAGTTACAAAAGCAGCATTCGATTCATGCAACGGTACCGCTCCCATATCTCTCATTACCACTGGCCCTGCCAATATCACCCTTGATGTTGCCGGCGAACACTACTTTATTTG…
Isoform_41906	GAGGATTCTCATTCATTCTTTTCTTTCAATTTCGTGCATTTTCTTATTCTAACCAATGGCTTCTAATAACAGCGCGTCGTCCAAAGGTCTCATCGTCAGCTTCGGTGAGATGCTGATCGATTTCGTTCCAACGGTTTCTGGAGTCTCCCTCGCCGAGGCTCCCGGATTCCTCAAGGCCCCCGGTGGTGCTCCGGCCAACGTGGCGATCGCGGTCACCCGCCTCGGTGGCAATTCGGCTTTCGTCGGAAAGCTCGGTGATGACGAGTTTGGCCACATGCTCGCTGGGATATTGAAGACCAACGGTGTTAAAGTGGAGGGAATTAACTTCGACGAGGGTGCTCGTACGGCTCTTGCATTCGTGACCCTTCGACACGATGGGGAGCGTGAGTTCATGTTCTA…
Isoform_4200	TTTTTTTTTTTTTTTTTTTTTTTTTTTTACGAAATCATCATATATAATTCAAGAAAGAGAGAATATGTATATTTGTGCCAAAGTGTGTTACAAGTAACAAAATAATTTCTTCCTTTTCTAACATTTAAACTTCACACATTCAAAATTTGATAGGAATCGTGTTGCACTACAAATCTACAAATTTAGGGGACCATTTTCTATCTACCACGTAACATAGAATAGTTATTTCATTAGAAGCCATAGGCTTTTTCCCAGTCGATGATGAATCCGCGTCAGCAGAAAACCTTTGTGTATAAAAACCAGGTTGCTTAGGTTCGGGCAGTACCAAATTTTCACTATCTAACATTAAAAGAACCATCGAAGATGAGGGCCTGTCTTCAGGGCGTTGTTGCACACACA…
Isoform_42028	GTTCATTTTCAAAAGTCGCCGGGATTTACGCCATATGCATTAGACGAAAAATTTCAACAATTACACCACATCACAATTCACAAGTCCATCAATGGCTGCACAAGTCCTAAATAACCAGGAACAACAACAGCAGCTACCTCCACTTCTTATCCACCGCATTCCATCATTCCGTATTCTTTTCAAGCCCTTACTACAGGCCCGGTTCCGCCTGCTCGATCCGTTAGATTCGTCAGAGTCAATTAGCTCTTTCTTATCCACCCAAGCCGAGTCCCTCCAGCTTCTCCTCTGCATTGGCCCTTCTCCTCTCAACGCCGACACGCTGCGCCAGCTTCCGTCACTTCAATGCGTTGTCTGCTCCAGTGTCGGCGTTGACCACGTCGACCTGTCGGAGTGCCGGCG…
Isoform_42224	CAAGCGCACCGGATCTATTGTGGATGTTCCTGCGGGAAAGGCTATGCTAGGGCGTGTGGTCGACGCGTTGGGAGTACCTATTGATGGAAGAGGGGCTCTAAGCGATCACGAACGAAGACGTGTCGAAGTGAAAGCCCCTGGGATTATTGAACGTAAATCTGTGCACGAGCCTATGCAAACAGGATTAAAAGCGGTAGATAGCCTCGTTCCTATAGGCCGTGGTCAACGAGAACTTATAATCGGGGACCGACAAACTGGAAAAACAGCTATTGCTATCGATACCATATTAAACCAAAAGCAAATGAACTCAAGGGCCACCTCTGAGAGTGAGACATTGTATTGTGTCTATGTAGCGATTGGACAGAAACGCTCAACTGTGGCACAATTAGTTCAAATTCT…
Isoform_4256	CTGCGCGCTAACCTAGAACCCACAAAGGGTGTTGGTCGATTAAGACAGCAGGACGGTGGTCATGGAAGTCGAAATCCGCTAAGGAGTGTGTAACAACTCACCTGCCGAATCAACTAGCCCCGAAAATGGATGGCGCTTAAGCGCGCGACCTATACCCGGCCATTGGGGCAAGCGCCAGGCCCCAATGAGTAGGAGGGCGCGGCGGTCGCTGCAAAACCTGGGGCGCGAGCCTGGGCGGAGCGGCCGTCGGTGCAGATCTTGGTGGTAGTAGCAAATATTCAAATGAGAACTTTGAAGGCCGAAGAGGGGAAAGGTTCCATGTGAACGGCACTTGCACATGGGTTAGTCGATCCTAAGAAACAGGGGAAGCCCGTCTGATAGCGCTTTTTGCGCCTACTT…
Isoform_4270	TTTTTTTTTTTTTTTTTTTTTTTTTTTTTTTCTTCCATCTCTTCAACCAATTTCAATTCTCTTCCTCTCAGTAAGATCTTCAGTCAACTGACAATTCTGCCACTTGTTTAAGGCTTTCGACTCCGCCATGGACGCAGCATCTCAGCTCGTCGTCTACTGCGGAATCGAGCCTTTCCGTCGTACATTCTCTTTGAAGAACTCTTCATTTTCGACCAGACTTAAGGTCCGTAGACGGTCCAGTGTCATTCTTGCGGTGGCCACTGAGCCCAAACCAACTCAAACCGAATCTTCTAAATCTCCGCCACCGAATGTCATCAATGGTTCCTCAAAATCTTCGCCGGCCAAGCCCATTAACGGACTTTCCACGAGGATTGGAGATGTTTCACAAGAGATTAAAAG…
Isoform_42814	TTTTTTTTTTTTTTTTTTTTTTTTTTTATTTATAATGATTGAGATAAGACGAAAACTTCAACACGTCTTGATTTTGGGATTAATATTATTTTTATCCTTTTGATTGCTTGTAAGATCAACCACTTCAATCACAAACCAAACCCCAATCCCCAATATCATAAACAAAAGAAAAATAACATTGAACTAGAAATGAATCCTGCATTCTAAACCTAAACATTTTTATGTTTGCATATATTCCATGTACAATTCAACCTTAATTCCCATATAGCTTCAGACATTTGCACCATATGACCCTAATGATAACGAAAAGTGCAGAAGCCAGAATAATAAGAAGTTTAAAGAAATCATGAATCTAATGAGTATTCAATTGAAGAGGCCTAGGGGGATCCATGGTTCTTC…
Isoform_43287	atctataaGAACCACTTCCACCACCTATTGAACTTCCACCGCCTATCCCAAAGATCGAAAAACCACTTCCACCACCTATTCCAAAGATTGAGCCACCGCCGCCTATCCCTAAGATCATAAAGCCGCTTCCACCACCAATCCCCAAGATGAAAAAGCCTTGTCCACCACCAACCCCAAAGATTGAGAAGCCACTTCCACCACCTATTCCAAAGATTGAGCTACCGCCGCCTATCCCTAAGATTGTAAAGCCGCTTCCACCACCAATCCCCAAGATCAAAAAGCCATGTCCACCACCAACCCCAAAGATTGAGAAGCCACTTCCACCACCTATTCCAAAGATTGAGTCACCGCCGCCTATCCCTAAGATTGTAAAGCCGCTTCCACCTCCAATACCCAAGA…
Isoform_434	ACCAATGCCAGGGTGCAAAAACTAGGAACACATACTATCTCCATGGCTCAATCCATCCAACTTCTATCAGAAAAGTTAGACCAAATCTCACCGAAATTAGCTAATTCTAGAAGTTAACTGTCGGAGTCCGAATCAGAAGAAGAGGGTCCATCTAGCAGGAAAGGGGAAGAGGAGCAAGAGCAAGAGGTGACCGGCAAGAAGAAAATCAGTAAGTCTAGAGGTTCTTTTACTTCCCTTAAAGTGGATTTTAAGATTGAAATACCAGTTTATGATGGAGCAGTAGAAGCTGAAAAGTTAGATCTATGGTTAAGTAAACTAGAGACATATTTTTCAGTTTATAAGTGCTCTCCCATGTAAAAGATAAAATGTCCAAGTCTGAAGTTAGAATTGTATTTTGGT…
Isoform_4343	TACAAGAAGAGAAACCATATCGAGAAGGAGGTCGATACTCACGAATAGGGTAGCGGGTAGTATGATTAGAAATGACAGGAGAAGGGTGAGCAGTACCTGAGGAGGATTCTGGCATAATAGGCTGTGCATCCTGAGCGCGAGGGCGACGAGCATAAGATCTCTCAAAGAAGAAAGAGGGAGGAGCAGATTCTGCCGCTGGAAGATCAAGAACAGGAACAGGAAGTGCCGGTGGAGAAGTAGACACAAGAAGTGTCACAGAAACTTGTACAGGGTTAGTACCAAAATAAGGAGTATCCTCAAAGAAAGTAACATCCATGGAGTAATAAGTATGACGAGTAACTGTATCATAACACCTATATCCTTTGGAAACAGATAAATAACCAAGAAAAATGCAACGAA…
Isoform_4346	CACATTATCCTCTGTTCATTTCCTCTCCAAAATGGGTTTCTACAAATTCTCTTCATCCATGGCGATCTTCCTCTTCTTCCTCCTCTTCATCTCCTCATCAGCTCTAGACATGTCGATCATCAAATACTCCGAGAATCACGGAGATAAATCAAGCTGGAGGTCCGATGAAGAAGCGATGACTTTATACGAGTCATGGCTTGTAAAACACGGCAAGTCGTACAACGGGTTGGGCGAGAAGGATCGGAGGTTTCAGATCTTTAAGGATAACCTTAAGTTCATCGACGACCACAACGCCGAGAATCGGAGTTATAAACTTGGGTTGAACCGGTTTGCTGACCTCACCAACGATGAGTACCGGTCCATATATTTGGGGACGAAGATGGATGTTAAGAGAAGGGT…
Isoform_43526	ACCGTATGATCTTCCCTTAAAACCCACCATCCCATACCCTCTAACGTCATGTATTTATTTATACAGACACGTACTTTCAAGTAGAGCTCCTCCAACCTTTTTTTCTTTCCTCTTCATCAATCAAAATCTTCTCCCATTACTCTGTGCACCCATTGCACGCCCCCTTCCTCCCCTCTCTCCTCTCAGTGTTCCTGTTCATGTTTTATAGCTGAACAGTGTTCTTACTCTTCTTAAACCTTCTCTGCTTCTCAACTCTCTCTCTCTCTTTGTGCATTCTTCAATTCATACACTTGAACTTGTCCCAATTTTTTATTAAATCTCTGCAAATATTTAGTAATGGAGCTAACAGGTCACCTAATCCAATACCTACTTATATAAATATCAGATTCAACCTTTATA…
Isoform_43553	GGGAGGAGGAAGAAATCCACCACAATGTCTGTAACCACAACCCCTACCGCCGCCGCCGCCGCCGCCATGGAAAGGCAGACCTACTGGTGTCACGAGTGTGATATCAGCGTCTCTCTCCTCGTATCCTCTGGCAACGACACTCTCCTCTGTCCTCACTGCCACAGCGACTTCCTCGAGGAAATGGAGTCTTCCCTCCCCATCTCCCCTAATCCTAATAATTCGCCCTTTCCCATTCTATCTCCTCCTCAAACCCTACCGTCCCCTGCTATCAGTCCGGAAGATCTCGTCATTTCTCAACTTGCACCTACCGCCACATCCGACGACAATTACCTCCTCGACAGCCCTTATCTCCAGCGTCTCATCCAACACCTCTCAGATCCCCAAGACGATTCCGCCCCA…
Isoform_4358	AAGGAAGACAAGGGTACTCTTACAAAGGACACAGCCAAGAGAGAAGTGAGGATTGCGCATATGGGGTTGAAGAAATATCACCACAAAACAGAAACAGTGTGAGTGATTTCATTCATTGGAGACAGAACAAGAAGCGGTGTCCTCTGTAATGGGTTTTGCATGCATTTTCTCGAAGGGCAAAGCTCAGACATATTAAATCTGCTTTGAATGATTTTGTTTTATTCATTAATAGCTCTTGTTCAATTAATTGCTTACAACTTTTTTGAAGTAAACTCCACTTGTTTTTATTGTGCTTCATATTTTGTACATATCTGGGTATATTGAAAGCTGGGGAGAGAGAGACTAGTATCATCATCTGTGTGTTTGTAAGTACAGTTGCTTTGTAGATGAAAGATATGC…
Isoform_43806	ACACACACCAGCACATGAAAAGAGAGAGAGCAAAAGGAGTCTTACCAGGTACTCACGCGGCAGAGAAGAAGGCTGGTCTCACAGCTAGTGGAGGAAGACGAGGCGAAACCGGAGCAGATCCGGTGACTACAGGACGGTGGATCAAAGGTTGTTCCACTGCACCGGTCGACAGCAAGGCGTCATCACGGTGGCGGCCCAAGCCAGCCGGAGCCAGAAAAAAGCTCAACCGCGGCAGCAGAGGACAGCAACACACGGCAAGGGCACTAGTCTAGTGACATCGGAGAATGCCAGTGGTGAAGGCGGCGACAACGATCGCAAGAAAATATGAGGACATGGCTGGAGAATCCAGATCCAGTGGCGGCAGAAGGAATCCATTGGCTGGGTTCGATTGAAATCAAA…
Isoform_43810	AGCCACCGCCGCCTATCCCTAAGATCATAAAGCCGCTTCCACCACCAATCCCCAAGATGAAAAAGCCTTGTCCACCACCAACCCCAAAGATTGAGAAGCCACTTCCACCACCTATTCCAAAGATTGAGCTACCGCCGCCTATCCCTAAGATTGTAAAGCCGCTTCCACCACCAATCCCCAAGATCAAAAAGCCATGTCCACCACCAACCCCAAAGATTGAGAAGCCACTTCCACCACCTATTCCAAAGATTGAGTCACCGCCGCCTATCCCTAAGATTGTAAAGCCGCTTCCACCTCCAATACCCAAGATCAAAAAGCCATGTCCACCACCAATCCCAAAGATTGTGAAGCCACTTCCACCACCTATTCCAAAAATCAAAAAGCCATGTCCGCCAACCG…
Isoform_43974	ATTCTTCGCTCTCCTATTCTCTGCTTGCAGCAGTGCCGCTCGCTGGGTCTCGGCCTAGCTTGAGCGGCGTTGCTCACTCGGGTTAGGGAATATTCCGATCTCTATTTTTTTCTTTCGCTTCTCGATGTATGCTGAACAATCGCTTCCAGAATGTCTCGATTCTCCTCACTTGGGCTCTTTCTCTTTTCTGTCAGATCATTTGTGAATTTCGATCGGTGTGATTTTTTCTTCTCCTAGATCAGGTGGTTGAGGTTTGACTGATGAGGATTCATGGATGGTTGTATATCAAAGTGATTGAACTTGAAGTGAATTCTATTCAAGGCCAGTTTGTTCTTTATGATTTATAAGGTATTAGTCTGATCTAGCCTACTCCGGTCAAATTAGTCTCATCAGGCGCAC…
Isoform_44082	ACCCAAAACCTCTCTTGCTATGGAGACACCGAAGCTCGTATTTTTCTTCGTCTTCTTCTCTTCCTTCCTCTTCTCTCTGGTTAATTCATTAACTCACCATAATCATCACATAAACCGGCACGATCTCGATGGTTTTCGCCCGTCAAAGCTTTTTGTTTTCGGAGATTCATACGTTGATACCGGAAATATCAAGAAATTTGAATCAAGCTCTTGGAAATTTCCTTATGGAATCACCTTTCCCGGCCGGCCGGTTGGCCGTTTCTCCGACGGGCGGGTTTTTACTGATTATTTAGCTAAATATATGGGAATCAAGACTCCAATACCGTACAAATGGAGGAAATTTGCAGGCAACAAATTAAGATATGGAATGAACTTTGCATATGGAGGTACTGGTGTGTT…
Isoform_44333	TTTTACTGTTCCCTGCTCAGCTTTTATGGGATCTTTTTCTTTTCTTGCGATAACCCAAAAGGATCTCTCTTCATCAAGGATCTGTCGACATTGAAGCTTCTTTTTACTTTTTGAGAATCCAGATTTTTGATTCGAAAATGGGGAAAGCAGGAAGAGACTGGTCACAGATCTACGCAATCTATGGCATGGATGAATGGCATACGCTCATCTTCCTCCTCATACACGCGATTGTCTTTTCAGTCCTCTCAATACTCTTCCTCATCTACTTCAACACAGTATGTCTCTTCTTCGAATCGCTCCTCTCCGGCGCCGCCGCCGCCCGTTTCGCCGCAGGCTTCACTGGTGCCGTCACCGCACTCTCCGCTTTATGTCTCTTCTTCGCCGCCGGCAACATATTTT…
Isoform_44379	ATATTCTCTTGATTTGGTTTTCATCAGTCTCGACCCTACCGATTCTCAATCCCTCTGTTCTCGACCCTTCGTCAGTCTTTGCCATTATATTCTCTCGATTCTCGATTCTCATAAGTCTCAAAATCTATCAGTTCTTTCCGTATCATCTAATATTCCCTGCACCTAGAACTCTCGCAATTGTTTTCAAGCCTCTCAACAGTCTTTGCCACGCGGTTCTTCGAACTCTCCACGCGGTTATTCAATAGTCTCACTCATCCAGGTATCACGGATGACAAATTCGTAGCAAAATACCCCGGGAATCGTATATGCTCTGTATCGACTTTGTGCTCCTACTGCGGGTCTAGCTTTAATTATGGTGTAATCAAATTATACCCAACGATGCGCTATAAAGGCAAGCCT…
Isoform_44426	CGGAGATCCCTGGTTCTGCGTCTGTTTTGTTTTGTTTTGTTTTGTTTTGTTTTTTTTTTTTTTTGAGCGTGAGGCTCTGACCAAGAAGAAATTGGTATTGAATCGTCTTGTCCAAATTAGAGCAAGACCATTTATTTATATGCACACATAATTACAAGAGAGACTAAAATACCCTTGGGCTTAATCCAGGGCAATACAAACGGAATAATAAATATAAAAAACAAAGGCCCATTAAACTACGTATTCCAACAATAACTAGTTCTAACATACTTAGATAATTCACAAACAACACATTTGAATTTATGAAACTTGTAAGCTTTTATTAAATCTGGAAAAAGTAAACACAAATATTGAAAATTAACATGTCCGACTCGAGCATGCCATAGTTCAAGATTATTC…
Isoform_44715	TGGCACAAATAACATTTGATTATCCATTTAGAATACCCCCATATTTTGCTCTCATAATTAGAGCCATTGGGGTACTGGAAGGCATAGCTTTGGTGGGAGATCCTGATTTTGCCATTGTCGATGAAGCCTATCCATACATTGCACAGAGGCTTCTGACTGATGAATCCCCGCGTCTAAGGAACGCTTTACGGTACACGATATATGGGAAATCTGGAATCTTTGATGCCGAAAGGTTCATTGATGTCATGCAAGCGTTTGAGAGTTTCATAACTGCGGTTAAAAGTGGAGGTGGAGAGGATATGAATGGGGATATGGCTGAATTAGGCATTCTACAAAATCAGCCAAACATCTTTCCTGGATTCCCATCAAGTGCCTCTCAGCAAAACCAGCCAATTCAAA…
Isoform_44729	GAGAACCATCCATAAGAAATATATCAACATGAGTGGTGGTCGGGGTGAAAATACGTTGCTTCTTGCTCTCCAGCTGGCACTACTCTGCCTGCTCTGTATTCCTTCTATTCTCGGCAATTCAGCCCACGGCTCACAAGCTGGAAGGAAGCTTTCCACTGAAATTAATCCTGGATTCATAAGCATCGATTGTGGTGTAAATGAAGACTATTACGACCAGAATATTGGTATATATTACAAGTCTGACATGGAATTTATAGATACCGGGAAGAACATGCCGGTAGCAGAATCCAGCTCTCAAAATATTAATATTCGGATGAGGAACTTAAGAAGTTTTCCAGAGGGAAAAAAGAATTGCTACACCTTGAAACCTGAAAATGGAAAAGGGGAGATGTACTTAAT…
Isoform_44869	CTAAAAGAGGAATGCTTTGCACAGCTTCACAGTGCATCAGCCACACCATGCCCTGCCCACAATGGGCTGGAGGCATCAAAGTTGGTCTTGAAATCCAAAACAGCTAGCAAACACACATTTGGACTGCCCGGGAAGCTAAAATTCTCGCCAGCAACGTGCACTTCAGCCTTCTTATGGCCTCACTTTAAGTACCCGCCGCTACCCAAATTCCCACCCTTGCCCACAGGTCACCCATGGCTTAAGCCATTTCCTAAAGTTTACCATCCACCTTTGAAGAACTTTGGTCATCCTATGTTCCCATTCCCTCCAATATATAAGAAGCCTTGCCCTCCAATACCAATCTATAAGGAGCCACTTCCACCACCGGTACCAATCTATAAGGAACCACTTCCACCACCT…
Isoform_44976	CTATAAGGAACCACTTCCACCACCTATTGAACTTCCACCGCCTATCCCAAAGATCGAAAAACCACTTCCACCACCTATTCCAAAGATTGAGCCACCGCCGCCTATCCCTAAGATTGTAAAGCCGCTTCCACCACCAATCCCCAAGATCAAAAAGCCATGTCCACCACCAACCCCAAAGATTGAGAAGCCACTTCCACCACCTATTCCAAAGATTGAGTCACCGCCGCCTATCCCTAAGATTGTAAAGCCGCTTCCACCTCCAATACCCAAGATCAAAAAGCCATGTCCACCACCAATCCCAAAGATTGTGAAGCCACTTCCACCACCTATTCCAAAAATCAAAAAGCCATGTCCGCCAACCGTTCCAATATACAAGAAGCCACTCCCACCTCCGGTTCC…
Isoform_4515	TTTTTTTTTTTTTTTTTTTTTTTTTCCGCTTCTCATAAAACCAGCCACGAACTTGGAATCCGAATGGTTAGAATTTCTTCTAAATTGTTTATCTTCTTCCTCAATCTTCTTCTTTCCCCTGGCTGCAACCTTTTCTCCTTCAAAATTAGCTGGAGTATCTCGTGTATCTTGATTCTTATTTAAACTAATTTTCAGCTGCAAAATTTGAGAGATTTTTGCTAGCTCTTCTTCTATCTTCTCCACATCTTCTCGGGCATGTTGGACTAGATTCTCCACAGCCATCATGCGCACCTCTATTGCAGAACTGTTTTCCATTTTTTTTTGTTTCAAAGCTTCAAAGAAGAAGGCTATGATACCAATCTGTTGTAGGACAATTTATTGAAAGTAAAATATATTAGA…
Isoform_454	TGGAGAGAGAGAGAGATGGTTGGAAGGGACGGTAATGGTATGATGGATGGAATTTGGGGAGGAACTCTGCCTCTCTGAATTAGCAAACCTACTTGCTTTCTCTTCGATCTTCACTAACTAAATTGGAAAAAATAGTAAAAAAAAACATGGGAAAAGAGAGACTCACTGATTAAGGTTCTGGGCTGGGTTTTTTTGTTTTGTCATTTACGCATAGTTAGGTTTTCTGGGTATCAATGCCCTTGTGAAGCAGCAAATGGTTTCATGAAAATGCTAAGCTGGTTAAAGCAGCTGTTTTGGCTTTGGGCAAGTAGAGGGGGTTGATCAGATATAGATCTCCTCGAGGATATAAATTATACATGACCAGAGTTCTGTTGATCAAGCTGCATGATATATCTATCT…
Isoform_45726	ccgtGTTAGCCTTCTGAAGGAACGTTAGCCAAAACCATTCTAAGCCAACCGACGGAAGTAACTCTTTCAAACGGTCTCAACTCTGCACTCAATATGTCTATCCATTGCATTTCCTTCTCAGCCCATGCTGATTTTAAGCAAACGAGCGCCTTCTTGGACGAGCTGGATCCTTCTAATATAATCCTCGTTCACGGAGAATCTAAAGAGATGGGAAGACTCAAGGAGAAGCTTATCGCTCGGCGAAGCAACATGAAAATATTCTCACCAAAAAACTGTGAACGCGTTCAAATATATCTCCGTTCAAAGAGAGTGGCGAAAGTTATTGGAAGTTTAGCTGAAAAGACCGAAAAGATCCCAAAAGTAGGAGAAATTGTGAGCGGGTTGTTAGTGAAGAAAAGT…
Isoform_45892	TACATGCAATCATTATAGAAGTAGAGTTCTTTCGTCTCGAGGATCAGCTGAGCCAACTAGCCCAGTTAGTGCAGTAGCAGACATCCTCATCTCAGACGCTTTCAGCTATCTGCCACATGTACAAACATATTACTCTATGCTCAAAGTGCGCCTAATAGTAGTGATTGGGTCCTAGATTTTGGAGCCAATGATCATTACATTGGTAAGTAGTACATCTAGCATATCTCCTATTAGCTATACTGTCCGAGTAGCATATGGATCTTTTCCACCTGTTTTATATAAAGGGTATGTAGCTTTATCTCCAAAGCTAACCTTAAATAATGTTCTTCATGTCCCAAAAATGCAAGTGACCGAACCTACCTCATGGTTTGTGATAAAAATGCAACAATATTTCTAGCT…
Isoform_46352	CAACCGGCCGAAACCATTGCATATCTCCCATTGTCTCTGTCTCAACCGGTCGAAATCATCGCATATCTCCCATATCTCCCATCGCGCATCTCCTAATCGTCTCTCAACCAAAATTGATATTTTGATCGATCAGTTATCGGTATGAATCAGGGATCTAAATTTGCATTTTGAACCGGATTCGCAACATGACAACGATAATGGATATAGTGATAATCTTCTTGTCAACCAAAAATGCAAATTTTTAAGTTGGATGGGAATGGGAGAAGTAGTTACTTTATCAACAAACCCTCATGACAAGGTACATCACATGGTTCTTGGACCAGATTTTTAGAGAGTTTGGGCAGACTATGTACTAGTGGAAGGAGTGGAATTGTTAAGTCCCACATCCCAAATGTCTCT…
Isoform_46369	AACTCAGAAAGGCACTCTTCACTCCAATGTTTGGTCTACGGCTTTTGTAATCTGCACGCATCCATTAAGAAATCACAAAAAATTAAATCCCGTTTGCCGAAAGGCCGTTTCTCGATCTGGGCTTTCCTCTTTCTTCTCATCTCTTTGGTTTTGATACAAATTGTGAAGTTTTCTTGTTCTGGCGAAATTCTCTGGATTTTGGTTTTGATTACTATCAGGGATCCGTTTATTCAGGTCTAAAATCCATACAAAAATGGGTTTCAAATTTGAGGTTGAAGAAATGGGTTCTTAATCATTGCTTTGATTTTTTGTGAGGATTTGTGTTTCAATTTGAGTTAATTTCATCGTGATTCAAGTTGAGAATTGGGTTATTCGCCAAGAGGTTGAAGTCATGTTCTA…
Isoform_4655	gTTTTTTTTGGTTGGTTTTTTTTTTTTTTTTTCCCCTATGTGAGCTAGGCGTTGGCCACCTTCACAGCCTAGGGTCGCTTAACGCTTTTGAAAACACTGGGGCGGGAAGAGTCGGTGGAGAAGGAGATACATGAGGTGTCATAGAAACCTGTAAAGAGTTAGTACCAAAATAAGGAGTATCCTAAAAAAAAGTGACATCCATTGAATAATAAGTATGACGAGCATCTGTACCCTTTGGACACTGATGAATAACCAAGAAAAATGCAACGAATAGCCTTGTCATCCAGTTTTGTTTGAGTTAGACTCCTATTCTGTATAAAACAGGTGCACCCAAAGACACGAGGTAAAATAGGAAATAGAGTAGTATTGGGTTGGAGTACATGAAGAGGAGCCTTGCCT…
Isoform_46613	GCTCTTTCAAAAACAGAGAAAACAGAGCATGGAGGTAGAAAGAGTTCAGTCAATTGCTTCTTTATCACTCTCAACCAATACAATCCCTGCTGAGTTCATCCGACCAGAGAGAGAACAGCCCGCTATAACAACCTTCCAGGGACCAACCCCTGAAATCCCCACCATCGATCTCTCTGACCCTGATGAGGAAAACCTGATTCGATCCATCGACAGTGCAAGCAAAGAATGGGGAATCTTCCAAGTTATAAACCATGGGATACCCAGTGATGTTATAAGCAAGTTGCAGAGAGTTGGAAGAGAGTTTTTTGAGCTGCCATTGGAAGAGAAGGAAGTATACTCAAAGTCGCGTGATGGGAACAACACTGTTGAAGGGTATGGAACCTCGTTGCAGAAAGATGC…
Isoform_46749	AATGCAAAAACCGAACTGGGGTTGGGCTCCTCTTAACGCATAAAACCCTTCCTTTTCTCTTCTTCTTATCGCGGCCTCCAGTGCAACTAGGGTTTTGATCTGCGCGCTAACGACACAAGATGGCTCCCAAAAGAGGGGTGAAGGCTCCAGTAGCAACCAAGAAGAAGACTCAGGAAAAGGTTGTCAACCCCTTGTTTGAGAAACGTCCGAAGCAATTTGGAATTGGTGGTGCAATACCGCCCAAGAAGGATTTGACTAGATTTGTCAAGTGGCCTCATGTTGTTCGTATTCAAAGGAAAAGGAGAATTTTGAAGCAACGTTTGAAGGTTCCTCCTGCATTGAACCAGTTCACAAAGGCACTTGACAAGAATGTTGCGTCCAGTCTCTTCAAGTTGTTGC…
Isoform_46868	GGTACCCCTTACTATAGGCACAAAGTGCCTTCAGGAAGTCCTTTCATTAAGATAGCTAAAGTACTTGTGGCCGCAGCGAGGAAATGGAAGGTAGTGGTCCCAAGTGACCCAAAAGAGCTTCATGAGTTAGGCCTGGAAGAGTATGCCAACTCCGGGAAGTTTAGAATTGACTATACCACTGAATTAAGACTACTTGACAAAGCTGCTGTAAAGAGTGGGGCAACCTCACCATGGATGCTATGTCCAATAACTCAAGTTGAAGAAACCAAACAAATGGTAAAAATGCTCCCAATTTTGGTTGCAACATTCATACCAAGTACCATGCTAGCTCAGACGCATACACTTTTTGTCAAACAAGGCATCACACTTGATAGGAGCATGGGTCCCCATTTCGAAATC…
Isoform_4719	GAATCAAGGTTGTAATCTTGGAGAAGTCCATGATAGAGAGATTCGGAAGGGAGGATCTTGGGAAGATTCCAACAGTGGATCGGGAAATAAAGATGAAAACTGGGATTTCGAAACCCAGAGTTGCCGATTATCTTCTGACAAGGAGGAAAATGAACCAGACACGTTTCTTCAGATTATTAAATCATCGGGCGGGAATTCTTCTGCAGAACAAAGAGGGTTTGTGCCATATAAAAGATGTTTAGCCGATAGACACACCCAGTCATTGACTGTAACCAACGAGGCAAAGGAAGAGTCAAGAGTCCAGCTTTGTTTATAGTCAGTGATTTCACATAGGTTTTTTTAGCAGGTGGAGGAATTGATTCGGTTACGGTGTAAAGACATACCGGAGTGGATTCAAAT…
Isoform_47338	ATCGGCGGCCTCTACAGCAGCTAGGGTTTCTATCTGCTCTAACGAAAGATGGCTCCCAAAAGAGGTGTGAAAGCTCCAGTAGCAACCAAGAAGAAGACTCAGGAAAAGGTTGTCAACCCCTTGTTTGAGAAGCGTCCGAAGCAATTTGGAATTGGTGGTGCAATACCGCCCAAGAAGGATTTGACTAGATTTGTCAAGTGGCCTCATGTTGTTCGTATCCAAAGGAAAAGGAGAATTTTGAAGCAACGTTTGAAGGTTCCTCCTGCATTGAACCAGTTCACAAAGGCACTTGACAAGAATGTTGCGTCGAGTCTTTTCAAGTTGTTGCTCAAATATAGACCTGAGGACAAGGCTGCTAAGAAGGAAAGGCTTCTGAAAAGGGCACAGGCTGAGTCTGAG…
Isoform_47372	AGAGATGGTTGGAAGGGACGGTAATGGTATGATGGATGGAATTTGGGGAGGAACTCTGCCTCTCTGAATTAGCAAACCTACTTGCTTTCTCTTCGATCTTCACTAACTAAATTGGAAAAAATAGTAAAAAAAAACATGGGAAAAGAGAGACTCACTGATTAAGGTTCTGGGCTGGGTTTTTTTGTTTTGTCATTTACGCATAGTTAGGTTTTCTGGGTATCAATGCCCTTGTGAAGCAGCAAATGGTTTCATGAAAATGCTAAGCTGGTTAAAGCAGCTGTTTTGGCTTTGGGCAAGTAGAGGGGGTTGATCAGATATAGATCTCCTCGAGGATATAAATTATACATGACCAGAGTTCTGTTGATCAAGCTGCATGATATATCTATCTTATCGGTCGTT…
Isoform_47695	TTTTTTTTTTTTTTTTTTTTTTTTTTTTTAGCTACTCAGATGTTTCAGTTCGCTAAGTTTGAAAAGTCCAAAGAGCGCAGACTAGCCACGGAGCTTGGATACGGTTTCCCGATCGGAGATCCATGGATCACAGACGGTATCTCCCCATGGCCTTTCGCCTCTGAAAGCGTCCTTCCTTCTCAATGCCCGGGCATCCATCCAATGCATTTCCCATGTACTCTGCGTTGATCATTACGCTTCAACCGGGTTATTCTATTCCACCTGTTCTAAAAAAAAGAAAAATAAAGAAAAGAATTTAAATCAAAATACGTAATAGCATGGCGATACATTTATACAAAACTTCTACCCCGAGCACACGCAATGGAGCCGTAGACAGTCAAGTGAAATCCAATCCACGAA…
Isoform_47854	ATCGGCGAATCCACAGCCTGCAATTGTTTGGGCTTCCTCGAGTTCGGTGTACGGACTCAATACCAAGGTACCCTTTTCGGAAAAAGATCGAACAGACCAGCCGGCCAGCCTTTATGCTGCCACTAAGAAAGCTGGTGAAGAGATTGCACATACTTATAATCATATCTATGGCCTTTCGCTTACTGGGTTGCGATTCTTTACCGTCTATGGACCGTGGGGAAGACCAGATATGGCCTACTTCTTTTTCACTAGAGATATATTGAAGGGGAAATCGATTCCTATATTTGAAGCACCCAACCATGGCACGGTTGCAAGAGATTTTACCTATATTGATGACATTGTCAAGGGATGTTTGGCGGCATTGGATACCGCCGAGAAGAGCACTGGTAGTGGTGGGAA…
Isoform_48287	GTAAAATCTACGTCGTGTCCGACCAAGGCAACGACGACCCTGTAAATCCTAGACCAGGAACTCTCAGACACGCAGTCATCCAAGAGGAGCCATTGTGGATCATATTTGCACGTGATATGGTGATCAACCTGAAAGAAGAGCTGATGATGAACTCATTCAAGACAATCGACGGCCGAGGAGCGAGCGTACACATTGCCAATGGGCCATGCATTACTATACAGTACGTGACCAATATTATCATTCATGGTTTGAACATACATGATTGCAAGCAAGGGGGGAATGCGTACGTGAGGGACTCCCCACAACATTTTGGGTGGAGGACTTTATCGGATGGTGATGGAGTGTCGATCTTTGGTGGAAGCCATGTTTGGGTGGACCATTGTTCTTTATCAAATTGCC…
Isoform_48299	CGAGGCGCTGTCGACGAGTCGGGTTGTTTGGGAATGCAGCCCCAATCGGGCGGTAAATTCCGTCCAAGGCTAAATATTGGCGAGAGACCGATAGCAAACAAGTACCGCGAGGGAAAGATGAAAAGGACTTTGAAAAGAGAGTCAAAGAGTGCTTGAAATTGTCGGGAGGGAAGCGGATGGGGTCGGCGTAACAATAATGACATTTGTCGATATGCCACCGCCTGTTTACTAAGATCATCATAGATTATTAATGCGTGCATTCCATTATCGCGGAAATATTCCCCCATATTCTGGGTGTGCCATGGGGGAATATTTCCGCGATAATGGAATGCACGCATTAATAATCTATGATGATCTTAGTAAACAGGCGGTGGCATATCGACAAATGTCATTATTGTT…
Isoform_48940	TTTTTTTTTTTTTTTTTTTTTCTAACCACACAACACAAAAATTGGCATAAAATTTCGTGTTCAGGAAAAGGGGATAAGCTTTTTCGTGATAAAGTACATCCCAGATTTACAAATTGCTCTACTTTGTAAATATTCTTGGTTTCCCTTGTATTATTCCAGACAGATTAAAGTTCACTTCTCCTTTACATGAACTTCTCAAAGAGGTTCCTACCTATATAGCAGCAAACTATGTATCAACAATTGGTCTCTCATACCTTCTTAATATAACAATTAGATCTTCAGCATCACATCATAAACTCCTTTTCTTCTACGTGGTTAAGACTACAAAAGATGCATTCCTGCCTGCCTATGGGTGCACAAGGTATCCAAGTGCCGCACTGATTAAAGCCACCATACAAA…
Isoform_4903	GACAACCGGACAGGAAGATTTTGATTTATTTACTTCTTCTGTCTCCCTCTCTCTCTATTCAGATGGGAAAGAAGAAATCAGAGGCGGCCGGTTCCGGCAAGGATAAGCCGAACACCAAAGACGGAAAGAAAGAAAAAGTCTCAGTCTCAGCTATGCTAGCCAGCATGGACCAAAAACCTGAGAAAATTAAAAACACATCTTCGAACACTACTTCTGGAAAGTCCAAGAGCAAGGCGTCTCAGAAAGCTTCGTCATACACTGATGGCCTGGATCTCCCTCCCTCTGATGATGAAGATTATGAGTATGCCTCTGGAGAAGAGCAAAATCAGAATGAACGGCAACAGAGGTCCGAGTTAAAGCCACTTGAAGTGTCCATTACTGGAAAGGAGATGAAAAAAA…
Isoform_49052	GTCAACGCAGAGTATAATCGGGGGACCGACAAACTGGAAAAACAGCTATTGCTATCGATACCATATTAAACCAAAAGCAAATGAACTCAAGGGCCACCTCTGAGAGTGAGACATTGTATTGTGTCTATGTAGCGATTGGACAGAAACGCTCAACTGTGGCACAATTAGTTCAAATTCTTTCAGAAGCGAATGCTTTGGAATATTCTATTCTTGTAGCAGCCACCGCTTCGGATCCTGCTCCTCTGCAATTTCTGGCCCCATATTCTGGGTGTGCCATGGGGGAATATTTCCGCGATAATGGAATGCACGCATTAATAATCTATGATGATCTTAGTAAACAGGCGGTGGCATATCGACAAATGTCATTATTGTTACGCCGACCGCCAGGCCGTGAGGCTT…
Isoform_49227	GGCGGCCTCCAGTGCAACTAGGGTTTTGATCTGCGCGCTAACGACACAAGATGGCTCCCAAAAGAGGGGTGAAGGCTCCAGTAGCAACCAAGAAGAAGACTCAGGAAAAGGTTGTCAACCCCTTGTTTGAGAAACGTCCGAAGCAATTTGGAATTGGTGGTGCAATACCGCCCAAGAAGGATTTGACTAGATTTGTCAAGTGGCCTCATGTTGTTCGTATTCAAAGGAAAAGGAGAATTTTGAAGCAACGTTTGAAGGTTCCTCCTGCATTGAACCAGTTCACAAAGGCACTTGACAAGAATGTTGCGTCCAGTCTCTTCAAGTTGTTGCTCAAATATAGACCTGAGGACAAGGCTGCTAAAAAGGAAAGGCTTCTGAAAAGGGCACAGGCTGAGTCTG…
Isoform_49373	CTGTAAGAGTGGGGCAACCTCACCATGGATGCTATGTCCAATAACTCAAGTTGAAGAAACCAAACAAATGGTAAAAATGCTCCCAATTTTGGTTGCAACATTCATACCAAGTACCATGCTAGCTCAGACGCATACACTTTTTGTCAAACAAGGCATCACACTTGATAGGAGCATGGGTCCCCATTTCGAAATCCCTCCAGCATGTCTCACGGCATTCGTAACGATTTTCATGTTGATAAGCCTAGTAATCTATGACCGCTATTTCGTTCCAGCAATTCGGCGGTACACAAAAAACCCAAGAGGAATAACATTACTTCAAAGAATGGGAATTGGTTTTGTGTTGCATCTCATTGTCATGCTAGTTGCTAGCTTTGCCGAAAGGAAGAAACTTAGTGTTGC…
Isoform_4938	AAGGAAGACAAGGGTACTCTTACAAAGGACACAGCCAAGAGAGAAGTGAGGATTGCGCATATGGGGTTGAAGAAATATCACCACAAAACAGAAACAGTGTGAGTGATTTCATTCATTGGAGACAGAACAAGAAGCGGTGTCCTCTGTAATGGGTTTTGCATGCATTTTCTCGAAGGGCAAAGCTCAGACATATTAAATCTGCTTTGAATGATTTTGTTTTATTCATTAATAGCTCTTGTTCAATTAATTGCTTACAACTTTTTTGAAGTAAACTCCACTTGTTTTTATTGTGCTTCATATTTTGTACATATCTGGGTATATTGAAAGCTGGGGAGAGAGAGACTAGTATCATCATCTGTGTGTTTGTAAGTACAGTTGCTTTGTAGATGAAAGATATGC…
Isoform_4939	AGATCATCCCAAAACAACTGAAACAATGGTTCCATGGCTCCTCTTAGTTCAAATCTTTATGGTAAGGACTATGGCGGCAAAAGTTCCTGCGGTTGTCGTGTTCGGAGACTCCTCTGTTGATTCCGGAAACAACAACCAAATTCCAACTTTTCTCAGGAGTAATTTTGAGCCCTATGGTCGGGATTTCGCGGGTGGCAAGCCCACCGGAAGATTCTCCAACGGTCGAATTCCTACTGACTTCATCTCGGAGGCGTTTGGGCTCAAGCCAACAGTTCCCGCCTACTTGGATCCAATGTATAACATTTCAGACTTTGCCACTGGAGTTTGCTTTGCTTCTGCTGGATCAGGTTATGATAATGCTACTTCTGATGTAATGTCTGTAATCCCTCTGTGGAAGGA…
Isoform_49657	GGCCACCTCTGAGAGTGAGACATTGTATTGTGTCTATGTAGCGATTGGACAGAAACGCTCAACTGTGGCACAATTAGTTCAAATTCTTTCAGAAGCGAATGCTTTGGAATATTCTATTCTTGTAGCAGCCACCGCTTCGGATCCTGCTCCTCTGCAATTTCTGGCCCCATATTCTGGGTGTGCCATGGGGGAATATTTCCGCGATAATGGAATGCACGCATTAATAATCTATGATGATCTTAGTAAACAGGCGGTGGCATATCGACAAATGTCATTATTGTTACGCCGACCGCCAGGCCGTGAGGCTTTCCCAGGGGATGTTTTCTATTTACATTCCCGTCTCTTAGAAAGAGCCGCTAAACGATCGGACCAGACAGGTGCAGGTAGCTTGACCGCCTT…
Isoform_4972	ATCTTTCTAGGTGTGATGCCTAGAAAGCTATTGGTGTGATTTCAATAGTTTCTATTCTCTTCTCTATTTCTTCTCATTTTCATTATTTCTACAAAAATTCCACAATCTGTTTAAATTGTTTCCTAGTCTCTTACTCATTTTAAACATTCAAGCTTCCACCTACTCTGTCCTGCATCAATTTGGTATCAGAGCAAGGGTAGATGTCATGTGTACACCACGATCAGAAAGAACTGAAGACAAATGTGATGAGTTGCTAAACCAAATAGTTGAGCAAATCAATGCCCTTAGTATTCGAATTAACAACTTTGAAAATCAAAGACTTCAACCTACTAATGGTTTAGAAGATGTTGAACAATCCAAAAATCAAAATCAAGATGAAGGGAAGATAGACACTTCACT…
Isoform_4995	TTTTTTTTTTTTTTTTTTTTTTTTTTTGGTTTCTGCATTGGTCTCAAAAACTTTAACTGGGAAAAAAATGGGCTACAAAATGCAGTGCACCGTTGTTAAATTCTTAAGAATCTTATTTTAAATTAGCTTAAAAATGAAGTCATAGAGAGGAAAGACTCTAAAATATCGAGTCAAGGGCAGTTGAAATTAGCGGTCTGCCAATGGGCAAATGTGGTTTGGGTTGCGTAATACAGTGAAGCGAGGTGAATCATATTTTTGTGGGTTGGTTCGATTTGGTTCACGGTTTTTTTCAATTTTCAAAAAATTCCAACCCGTGACTGAACCATGCCTGTTTGGTCGGTTTTGGTTCATAAACCAATCTATGATCACCCCTAGATGTGAGTGACTGGACATCAGATC…
Isoform_5001	cCCACTTTCTGTGATCTGTTTCTCTTGTGGCATATCATTGTAATCTGTTACTCCTTATCTGAAGTAGATCGCTAGACTCATTACATTGCAGGATGGTGAAGTGTATACCAGTTCTTGGTTTTGATTTTTGAAGGATTCTACCTGAGAATCCTACAAAGGCGTATCTACAGTTTGATGTTGGTTACTTGGTTGTTGTTTTAGTGAGGCTTGTTCTCAGCCTTTGTGGTTGCTTGATGACTGTGGTTGTGATTTGGGATGAATTCTTGTTATCAGATGCATCTATTTACATCCCTTGTTCAATGAAATTTGATAATTACGAAAACAAAGCGTATACAAATTCTTCCTAAAGGGAAAATGTAGTTGTTTTAGTGGGACTTGTTCTCAGCTTTTGTGGTTGCT…
Isoform_50138	ATAACACTGTGGTCGGAACAAAATGGCGGCTCCTCCACACCAAAATACTGTGAAAAGCTGGTTTAAATACTTCCAGTATAAGGAAGAAAGGGATACACCAAACGATGTTCGTAACTCTTTATTAGTGGTGGTGGCTCTGATTGCGGCTGTTACCTTCCAAGCCGGTGTCAACCCACCGGGGGGTGTATGGCAAGATGATCGAGATGGACACGTCGCCGGAACATCAATATACGCCGCCCGGAAGCCCGAATTCTACGTTTTCCTGATCTCAAACACCTTGGCTCTTTCCGCTTCCATCCTCGTGCTTGTATCTCTCACCTACAAGTTTCCTTTCCATTTCGAGCTATTGGTTGCCACCACTTCAATGATTGTCACTTACGGTTCTGCAATTTTTGCTGT…
Isoform_50163	CTCTGGATCTTCTTCACCGGACAAAATTTTAAGATGTCAAACCAATCTCTACTCCTGTGCAAAGTGGGAAGAAATTGAGTCTTTATGATGGGGAGGCGCTATCAGATCCAACTGAGTATCGTAGTGTGGTTGGTGCACTTCAGTATCTGACCATCACTCGTCCGGATATATCTTTTGCAGTCAATCAAGTCAGCCAATCCATGCATCAACTGACAAAGATTCATTCGACAGCGGTCAAAAGAATTTTGCGGTATTTAAAGACCACTCCGGACTATGGTCTTCTCTACAAACCTAGCTCTCTTCACCTCCAAGCTTGATGCTGATTATGCAGGGACCCTGATGCCCGGCACTCCACAAGTGGTTCCTGTATTTTTATTGGATCCAATTTAATCTCTTGGA…
Isoform_50322	AAGATTGAGAAGCCACTTCCACCACCTATTCCAAAGATTGAGTCACCGCCGCCTATCCCTAAGATTGTAAAGCCGCTTCCACCTCCAATACCCAAGATCAAAAAGCCATGTCCACCACCAATCCCAAAGATTGTGAAGCCACTTCCACCACCTATTCCAAAAATCAAAAAGCCATGTCCGCCAACCGTTCCAATATACAAGAAGCCACTCCCACCTCCGGTTCCAATCTACAAACCAGAACCGCCAGTGGTCAAGCCTCTTCCCCCAATCCCAAAGATCATTCCACCACCAGTACCCATCTACAAAAAGCCATGCCCACCTCTGATTAAGCCTCTTCCACCAATCCCAAAGTTCATTCCACCACCAGTACCCATCTACAAAAAGCCATGCCCACCTCTG…
Isoform_5034	AGAGAAGGGTTAAAATTAAGGCTTCGAGTTTGATTAATAGCAACGAAAACAAATTTAAAATTGTTCGATACGGAAATGGTTGATCGAGAAGAGACGTAGATTGGGGGTTTCATCTCCGAACGTTATCTGCTAGTGCCAGAGATTCCAATTTCGCGAGCGATCCTGCTTCTGATCCATCTCTCTTTAACTCTGTGCAAAAGCTTTATGAACAGTGCAAAGCTGAGAAATCCGATGATTTGATTGCTAGGGTTTATCCACCGATTAACAAGCTATTTCAACGATCGGTAGCGTCGATTTCTCAATCCCGGACTTCTAATGGCCTTCTTTTGCTGGCTATTCTTCAGTTTTTCCTTGATTTTGGAGAGATGGTACTACATGATGCTGATCCCAGTCTAAGGA…
Isoform_5049	TTTTTGTTTTGTCATTTACGCATAGTTAGGTTTTCTGGGTATCAATGCCCTTGTGAAGCAGCAAATGGTTTCATGAAAATGCTAAGCTGGTTAAAGCAGCTGTTTTGGCTTTGGGCAAGTAGAGGGGGTTGATCAGATATAGATCTCCTCGAGGATATAAATTATACATGACCAGAGTTCTGTTGATCAAGCTGCATGATATATCTATCTTATCGGTCGTTTCTGTTGAGAGCAGTTGTTTCTGTAGGGTTGCTCGATTCCACCTGTATTGAATCCGGGATTTCTCTTGTTTGATTGACCATTTTATGGGCAATACTCCTTTGGCAGTGGACAATCTCTGTTGGCAGTGGACAAACAGAAACTTCTGCTTCATTTGGGGCAAATCTCCTTTGGCAATAT…
Isoform_51147	ATCGGCGGCCTCTACAGCAGCTAGGGTTTCTATCTGCTCTAACGAAAGATGGCTCCCAAAAGAGGTGTGAAAGCTCCAGTAGCAACCAAGAAGAAGACTCAGGAAAAGGTTGTCAACCCCTTGTTTGAGAAGCGTCCGAAGCAATTTGGAATTGGTGGTGCAATACCGCCCAAGAAGGATTTGACTAGATTTGTCAAGTGGCCTCATGTTGTTCGTATCCAAAGGAAAAGGAGAATTTTGAAGCAACGTTTGAAGGTTCCTCCTGCATTGAACCAGTTCACAAAGGCACTTGACAAGAATGTTGCGTCGAGTCTTTTCAAGTTGTTGCTCAAATATAGACCTGAGGACAAGGCTGCTAAGAAGGAAAGGCTTCTGAAAAGGGCACAGGCTGAGTCTGAG…
Isoform_51228	ATCGCGGCCTCCAGTGCAACTAGGGTTTTGATCTGCGCGCTAACGACACAAGATGGCTCCCAAAAGAGGGGTGAAGGCTCCAGTAGCAACCAAGAAGAAGACTCAGGAAAAGGTTGTCAACCCCTTGTTTGAGAAACGTCCGAAGCAATTTGGAATTGGTGGTGCAATACCGCCCAAGAAGGATTTGACTAGATTTGTCAAGTGGCCTCATGTTGTTCGTATTCAAAGGAAAAGGAGAATTTTGAAGCAACGTTTGAAGGTTCCTCCTGCATTGAACCAGTTCACAAAGGCACTTGACAAGAATGTTGCGTCCAGTCTCTTCAAGTTGTTGCTCAAATATAGACCTGAGGACAAGGCTGCTAAAAGGAAAGGCTTCTGAAAAGGGCACAGGCTGAGTCT…
Isoform_51279	ATACAAACATAAACTTGAAAAGTCAAAAATATCAACTCTCTCTCTCTCCCTCTCTCTCTCTTCTGCAACTTTCTCTCTCACTACAATGGTTCTCTTCACTTCGATTTCTACAGCACCTCTCTCAATATCTATATCAGTTCATCACTCTCCAAGAAATTGTAAACGCTTTCATCCTTCATTTGCTTCACTGAGTTCATCAAGCCCCGAGTCTTTTCAAAGTGAAAGCAATAAACCCTCAAAAGCTTCACCAAAACCCTTTGTGGAATCCTCTAGACCCCCTGATTCGAGAGTCAACTATGCGCTTGCAAATCCGAATGGAAACCCAGTTCTTCGGTTTGCTCAGGCGGTTGAGTCTAACATCGAAAGGGTTATTTTTGACTTCCGCTTCTTGGCACTTCT…
Isoform_5128	TTTTTTTTTTTTTTTTTTTTTTTTTTTTTTAATAGTATGTTACTTTTATCCCATCATTTATATTTGGACACATACACCTCACATTTTTTTCTTCTTGTGGGTTTTTGGGTCGGGTTGGGGGCAACACGACACGACACAAAAATATGACAATTGAACTCGAACACGACTTCGGGTTATAATATCTTAACACGAGTACGACACGAACGCAACACGATTAACCCAATAATATTTATTTTTATATAAAAAATAAAAAAGACTACAAATAAACCATAAACATGAGCGAAAACCATAAAAATAATGTGTATTTTTTTAATTTCGAGTTAAGTTCTTGTTAATTTCTTTTACACGAACAAGACACGACACGACTCCGAATTATAAAAATCCAACACGAACACGACC…
Isoform_51500	TGGCAAAGACTTCAGATTTTCCTTTTAAAAGATAAAGCCAAGTGCATCGGGTGTGATCATCAATAAATGTGACATAATATCTGTGACCGGACAAAGCAGTAGTGGGAGAGGGACTCCAAACATCAGAATGAATAAGATCAAATGGAGCAGGTGCTCGATGCATGCGAGAAATATAACTAGTTCGAACATGCTTAGACAATTCACAAACAACGCATTTAAATTTATGAAATTTGCAAGCTTTTATTAAATCTGGAAAAAGTAAACACAGATATTGAAAGTTAACATGTCCAACTCGAGCATGCCACAGTTCAAGATTATTTAAAGAAAAAACATAAGAACCCGAAGCGGGCAACACAGAAGCTTGCAAACTGGAACTAGGTGGAGATAAGGTGGAGGTCC…
Isoform_51519	CTAAGAAGCTGGTGAAGAGATTGCACATACTTATAATCATATCTATGGCCTTTCGCTTACTGGGTTGCGATTCTTTACCGTCTATGGACCGTGGGGAAGACCAGATATGGCCTACTTCTTTTTCACTAGAGATATATTGAAGGGGAAATCGATTCCTATATTTGAAGCACCCAACCATGGCACGGTTGCAAGAGATTTTACCTATATTGATGACATTGTCAAGGGATGTTTGGCGGCATTGGATACCGCCGAGAAGAGCACTGGTAGTGGTGGGAAGAAGAAGGGACCTGCTCAATTACGGGTCTTCAATTTAGGGAATACTTCGCCGGTGCCTGTTTCAGATCTTGTGAGCATATTGGAGAGACACTTGAAAATCAAGGCAAAAAGAACGATGTTGAA…
Isoform_51687	GAGGGTATTCAAGTGTAATCAACGCTAGAGTACATGGGAAGCCTAACATTAACAGCTTCCAGTCAAACAGTACTCTCTCAGAGTCGCTCGATTACAGAGAAAGTATAGAAAGAAAGAGACGGAGATGGATGGGAATGGGTATGCTGATGGAAACGGAGGAGTATCGGGGACGTGCTTGAGCAGCTACATTGATGAAGGTAGCGTAGAGAGCAACAGGTACTACCTGTCACGGAGAACTGTATTAGAGATGCTCAGGGACAGAGGCTACACTGTACCCACCAACGAAATCGATCTTTCTCTTCAAGAATTTCGATCTATTTACGGCCAAAAACCCGACCCTGATCGCTTCCGGATCACTACTTCTCTCCGATCTGACCCTTCCAATAAGGTTCTGGTAAT…
Isoform_5185	AAGGAGCAGAAGGAAAGGAAAATGGACAGAGAAGATCAAAAGCCATCATCTCTCAACTCTCCCTTGATTCGTATCCTTGAAAACTATAATCAGTTCCGTACACAATAGAGATGGAGAGAGAAGCTTATGGAGAAAAGAATTTGGGGAAGAGGTGAAGAAGCAGCTATGGCTTGCAGGGCCTTTAATCGCTGTGAGTCTATTGCAGTACTCTCTTCAGTTGATATCTGTTATGTTTGTGGGTCATCTTGGCGAGTTATCTCTCTCTGGCGCTTCAATGGCCACTTCTTTTGCATCTGTGACTGGTTTCAGCTTGATGCTGGGAATGGCTAGTGCATTGGATACGTTATGTGGACAGTCCCATGGGGCAAAGCAGTATCATATGCTGGGTATACAGATGCA…
Isoform_5226	GGTCTTTTCTGTAAACTAGCTTCTTTCTCTAATAATTCTTCTCCTTTTCAGGTGCACATTAGGAACACCGTCTTCTCTCTCTTCTCTCATCATGCGTCTCATCACCCCACCTGAACAGACTCAAAATTCATGCTCAACTCCGGAAACCCCCAACGAATTAGCTCATGAGACCAGTTACTATCTTCAACAAAATGCCTATAGCCGAGTTAAATGGCGTCCATGGGGTGAAAAATCAATTAACGAAGCTCGAGATAGAGAAAAACCGATCTTCTTATCCATTGGATACAGCACCTGCCATTTATGCTATTGCGTGGACGTCGAGTGTTTTGCCGATGAAAACGTGTCCCAAATTCTGAATGAATGGTTTGTATGTATCAAGGTGGATGGAGAAGAACGACC…
Isoform_523	TGACTCGGCTGATGAGCGGGAAATCACATCTTGTTTCTTACTCTTCCATGAAATTAAATGATCCCCATAAAAAGTACAAAAGCCGGAGGTTGACCTCCTATCAGACTGGGATCCTGCATAATCTGCATCAGTATAGCATGATAACCCATTTTGAGGACCTGCAGCAAAAAAGAGTCCAAGACCAGGACTTGATTTGAGGTATCTCAATATCCGATACACAACTTCCATATGAAGTGTTCGAGGAGCATGCATGAATTGACTCACAACACTAACCGCAAATGACAAATCGGGCCGCGTATTAGTCAGATATATAAGTCTTCCCACTAATCGTTGGTACTGTGATGGATCTGATAATGGCTGCCTAGATTCACTTGATAATTTCTGATTTGGATCCATAGG…
Isoform_52310	CAACGCAGAGTACATGGGGTAGCGATTGGACAGAAACGCTCAACTGTGGCACAATTAGTTCAAATTCTTTCAGAAGCGAATGCTTTGGAATATTCTATTCTTGTAGCAGCCACCGCTTCGGATCCTGCTCCTCTGCAATTTCTGGCCCCATATTCTGGGTGTGCCATGGGGGAATATTTCCGCGATAATGGAATGCACGCATTAATAATCTATGATGATCTTAGTAAACAGGCGGTGGCATATCGACAAATGTCATTATTGTTACGCCGACCGCCAGGCCGTGAGGCTTTCCCAGGGGATGTTTTCTATTTACATTCCCGTCTCTTAGAAAGAGCCGCTAAACGATCGGACCAGACAGGTGCAGGTAGCTTGACCGCCTTACCCGTCATTGAAACACAA…
Isoform_52428	TTTGTTTTGAGGTTAAGTGAGTGGGAAAAAGAGGGGCCCATGGATTATGAATCCATGTGAGTGGGAAACAAAAATACCATGGGGAGGGTGTCTTTCTGAAAAATCTCATGGAATCTTGAGTTTAATTTTTTTTTTAATGGCAAAAGTGCCCCTATCACATATGAAAGTCAACACAAAAATTACATACTTTGCCACCTCAAAAACCCTTCCCATCAAACAACGTTTTCAAATTCCCAGCAATCTGAGAATCCCATTAATCATAATTCAACAAAAATATTCTTGGTAATCATAATCCACCCAAAATCCTTCTTCTTATCAAACGAGGCCTTACTAGCATTAGAGAGGTTCCATATTGGGAATAATGAAAATATAGGAGTAATTCTGAAAAATTCAGAATTG…
Isoform_52801	TTTTTTTTTTTTTTTTTTTTTTTTTTTTTGGTTTAATTCCTCCCCTCTTCCCCATTGACTGCAAAAAAAAATATACAAATGGGTTTTTGACTGCAAAAAAAAATATACACCATGGGTTTGCTAGCGATTTGATTCCTCTCCTCTTCCCACGGCAAAAAAAATATAGACCATGGGTTGCCAGCGATTTGATTCCTCTCCTCTTCCCCATTGAGGGCGAAAAAAAATATAGACCTGGGATTGCTCTGGCTTTGATACACCATGGATTTGCTCTGGGTTTCCTAGCTAGCTTTGATACACCATGGGTTTGCTCTGATTTTGCTCTCGTTAGCTGATCTGATTCCTCTCCTCTTCCCCATTGACTACAAAAAAAAATATACCGTCTCTTTCCTAGACATTTAG…
Isoform_5284	CCTTTTCAGGTGCACATTAGGAACACCGTCTTCTCTCTCTTCTCTCATCATGCGTCTCATCACCCCACCTGAACAGACTCAAAATTCATGCTCAACTCCGGAAACCCCCAACGAATTAGCTCATGAGACCAGTTACTATCTTCAACAAAATGCCTATAGCCGAGTTAAATGGCGTCCATGGGGTGAAAAATCAATTAACGAAGCTCGAGATAGAGAAAAACCGATCTTCTTATCCATTGGATACAGCACCTGCCATTTATGCTATTGCGTGGACGTCGAGTGTTTTGCCGATGAAAACGTGTCCCAAATTCTGAATGAATGGTTTGTATGTATCAAGGTGGATGGAGAAGAACGACCTGACATTTACAAGGTATACATGGAATTCTCTCGCTTATTAGG…
Isoform_53089	CAGTTACACTTTCTGAAACCCTTATCTCCTCCATCCTCAACTCCTGTAACCTCTTTACATACTCCGGCACGTGCGCTAGGTCCCACAGTACCCCAACACCACCGGGCTTCATCACCCTCACCACCTCCCCCACCACTCTCATCCTCTCCGCCGCTGCCTCCGCCGCGCGCTTCCCTCCATACTCCTTCCCCACCCTGTGAACGAACACACCCGACACCACCACGTCGAAGTAATTATCACTAAACGGCAACCTGCGTGCGTCACCTTCCCGACAGGTGACGTATTCTTGGACGCCTTCCATTTTGGCAGTACGTAGCGTTGAAACGGTTGTTGTTTTGTTACGGTCTAATCCAACTACCCGACCCGAACTCCCAGCTTTCTTGAGCTGCATCGCGACAG…
Isoform_53339	AGATAGGTCTCTTCATGCAAATTCTCCTCGACCTCAAGAATAGTTAATGCTTCATGTGCAACCGGAAGTGGTGGGGAAATTTTAAAACTCCCAGAGGGGTATGATGATGCAGCTTTTCGGGATTTCTTTTGTGTAGTTGAGGTATATCTCACTTCGCCTTTATACCAAAAGTTTATCCAGTCAATCGGGCTTATTTTCCCTTTCTTGGTCTTCTTAAGATAATGATAAGCAATAAGCAAGTAATGACAACTTTTTGGCAACAATAAATTTCCCTTTTGATCCACACTTGTTAGCTCCTTTGCAGTAGGAACGACTTCATCATAAAAAATTCCTTCAATGGACAGCCCGCCGATGACATGCAAGTCCCATAACTGAAATGGAAACCTCTCCAGATTGGGT…
Isoform_53708	GCGTCAGACGACTTATTTAGAAAAAAAATTACTGTAGAGAAAAGATCAGAGTCAGACGATGCCAAACCCTAAGGTTTACTTCGACATGACGATCGGCGGCGCCCGTGCCGGCCGGATCGTGATGGAGCTCTTCGCCGACACCACCCCTCGTACGGCGGATAACTTCCGTGCTCTCTGCACAGGAGAGAAGGGCGTCGGCCGTAGCGGCAAGCCTCTTCACTTCAAGGGCTCGGCCTTCCACCGTGTCATCCCCGGGTTCATGTGCCAGGGAGGCGATTTCACTGCCGGAAACGGTACCGGAGGCGAGTCGATTTACGGATCTAAGTTCGCCGATGAGAACTTCATCAAGAAGCACACTGGACCTGGAATTCTGTCGATGGCGAACGCTGGACCGGGGAC…
Isoform_53829	AATGGACCTGATCAAGAATTTGGAGGAGCTGTTGCCACTAAAGATGAGCAATCCGGCACATTGCGCTCGATCCTGGTCCATTAGCGAGGACTCTCTGAGAAGGTATGTGGACTTTGCAAGTGAGACTTGTATACAAGAGTTACTTTGTGCTTCAGACTCAAACAGAGTTGGAAGAAATGATGGGTGGAAGGTTGTTACCCACCACAAAGGAGTGGAGATATCAAAACGCAGGTCTGGATCACTTCACACTTTCCGTAGCCGCTGGCTGCTCAAGTCTGTCTCGCCTCAACAATTCATTACCGTGGCCAATGCCATCGATGCAGCAAAACAGTGGGATGCTGATCTGGTAGAAGCCAGGTACATAAAAGATTTAGAAGAAAATCTGAGCATAATTCGGCT…
Isoform_53999	ATCTCTGTAGCATCCGAAATGTCAAGACAATCTCTTGGAACCAATGGAAGAGTATCTCAACTTCCTGTTCAGGTGTTAACGCTTCAAGCTTCAAATCTAACATCAGAAGATCTAACCTTAACAGTTCTCGCTCCAGCCTCGTTCAGTTCACCTCCTTCGGTGGTGTCACTGAATTCCGCACCGGCAACCCCGATGAGTCCAATTACAGGAAAAGTAAGCGGTGAGAGACGTGGGAATGCAATGCAGAGGCTGAGCTCGGTGCCTGTTGTATCGGAAAACAAGAAATCAAATGGTGGTGGTGATGGTGGAGGCCGGTCGGTTTCCTTTAATGACCAAGCTCTACCCATGTCGGATTTTATTCCGAGTACCGGTTTGGGTTGTTCGCATTTATGGTTGCAG…
Isoform_54075	CATGGGTCCCCATTTCGAAATCCCTCCAGCATGTCTCACGGCATTCGTAACGATTTTCATGTTGATAAGCCTAGTAATCTATGACCGCTATTTCGTTCCAGCAATTCGGCGGTACACAAAAAACCCAAGAGGAATAACATTACTTCAAAGAATGGGAATTGGTTTTGTGTTGCATCTCATTGTCATGCTAGTTGCTAGCTTTGCCGAAAGGAAGAAACTTAGTGTTGCAAAGGAAAATGGCATTCAGGGGAAAGGCCAAATAGTACCTCTTACTATTTTCATTCTCCTCCCACAGTTTGCTTTAATGGGGATTGCCGACACCTTCATCGAAGTAGCAAAGCTTGAATTTTTCTATGACCAGGCGCCAGAGGGCATGAAAAGCCTTGGGACTTCGTATTT…
Isoform_54178	AGACAACTTATTTAGAAAAAAAATTACTGTAGAGAAAAGATCAGAGTCAGACGATGCCAAACCCTAAGGTTTACTTCGACATGACGATCGGCGGTGCCCGTGCCGGCCGGATCGTGATGGAGCTCTTCGCCGACACCACCCCTCGTACGGCGGATAACTTCCGTGCTCTCTGCACAGGAGAGAAGGGCGTCGGCCGTAGCGGCAAGCCTCTTCACTTCAAGGGCTCGGCCTTCCACCGTGTCATCCCCGGGTTCATGTGCCAGGGAGGCGATTTCACTGCCGGAAACGGTACCGGAGGCGAGTCGATTTACGGATCTAAGTTCGCCGATGAGAACTTCATCAAGAAGCACACTGGACCTGGAATTCTGTCGATGGCGAACGCTGGACCGGGGACGAATG…
Isoform_54394	CTCTAAACTTTAGTCGAAAAAGCCTTTTCACTCCAAAACCCAGAGGAGCCATGGAGAAGAAGAGCAGAGACGAAAAGATGACTGCAGTCGCCGAACCCCACAACAGAGCAGGTAGACAGCTCCCTCCTCCTCCTCCGTTGACAAGAGGCGTACCACCTCCCGCTCGTCCTCGCTTTCAGCCCGCTATCGATCGTGAAAAGACTTGCCCTTTGCTGCTTCGAGTATTTACTAAGACTGGAGGTCATCATAGCAAGGAAGATTTTGCAGTGAGAGGCAAGGAACCCAAAGATGAGGTTCAAATATATACATGGAGAGATGCTAATCTTCGCGAATTAACTGATCTTGTGAAAGAAGTTTCCCCAGCGGCAAGAAGAAGAGATGCAAGATTATCTTTTGCTT…
Isoform_5443	TTTTTTTTTTTTTTTTTTTTTTTCTTTTAAAAAAAAAGATAAATATATAGAAGAACAAGTAGATACAGTTGCCCTGAATTTCTTCCTTTTCTACCTTTATTTCACCTAATTAATTAGAAGTGGGAATATCTTTCATCGATCAGCAGCGGGAGTGCTTCTTGCAGTTGAGTGAACCTGCACCTTGTGTGATGGAACTAATTAATGAAGATGGTCTTGCACCCAAGCTCGAAGCCTTTGCATAACTTGATGATGCACCTGCACCTGCACCTGATGCTGTGAAAAACGCACCATTTAACAATAAATCTCCCTCTGACCTCCAATTCCAATGCCTCCATTCGCTCTGTGGTGCATCCTCATGTTTGGTTACCTCTTTGTTGAATCTGTCAATAGGTGCCAGAA…
Isoform_54512	ACGATCGGCGGCGCCCGTGCCGGCCGGATCGTGATGGAGCTCTTCGCCGACACCACCCCTCGTACGGCGGATAACTTCCGTGCTCTCTGCACAGGAGAGAAGGGCGTCGGCCGTAGCGGCAAGCCTCTTCACTTCAAGGGCTCGGCCTTCCACCGTGTCATCCCCGGGTTCATGTGCCAGGGAGGCGATTTCACTGCCGGAAACGGTACCGGAGGCGAGTCGATTTACGGATCTAAGTTCGCCGATGAGAACTTCATCAAGAAGCACACTGGACCTGGAATTCTGTCGATGGCGAACGCTGGACCGGGGACGAATGGGTCTCAGTTCTTTATCTGTACGGCCAAGACTGAGTGGCTTGATGGGAAGCATGTGGTGTTTGGACAGATTGTTGAAGGGATG…
Isoform_54608	ATTTTTCTACTGTTTGTCAGGTTACCTTCGTTTTTCCTGCATGTTGTGTCCTGCAACTCTCCCTCTCCGTTTTAAAGTCTCTCCCTCTCTCTGTCTGTTTGTCTATTGAAATTCTACGCATTTTATGATTCAAGGCCTGTTTTTTTGGTTGCTGATCAGGTTTTTGTTCTGATCATTGTGACACCATTGCTTGACGGAGAGAGAGAGCACACTTGTTGGCATTCATGCAAAGGACAGGATTGTTTACAGGTGTGCTCTCCCTCTTCGTCAAGGTGGATTTAGTTCTTGGTTCGAGCCTTGTTGTCTGTCATGTTAGCAGCAGAACGGACGATTCGTGTAATGGATTCTACAGAGTTGGGATAGATGTAGTTTTGTTGTTGTAAATTACATCCCTGATAG…
Isoform_54867	TCCGCCAACCGTTCCAATATACAAGAAGCCACTCCCACCTCCGGTTCCAATCTACAACCAGAACCGCCAGTGGTCAAGCCTCTTCCCCCAATCCCAAAGATCATTCCACCACCAGTACCCATCTACAAAAAGCCATGCCCACCTCTGATTAAGCCTCTTCCACCAATCCCAAAGTTCATTCCACCACCAGTACCCATCTACAAAAAGCCATGCCCACCTCTGATTAAGCCTCTTCCTCCAATCCCAAAGATCATTCCACCACCAGTACCCATCTACAAAAAGCCATGCCCACCTCTATTTAAGCCTCTTCCTCCAATCCCAAAAATCTTCCCACCACCAATGCCAATTTACAAAAAGCCATTTCCACATCCAATAGTCTATAAACCACACCCTTCCATC…
Isoform_5490	ATAGCCATACTTATTTTTAAACACCCAGTTTCTCCTATTTCTGTCCTGCATCAATTTGGTATTAGAGCGAGGGTAGATATCATGTCTATATCAGTGTGGGGAAGGACGCAGGCTGAGTTGCTAGACCAATTAGTTGAGCAAGTCAACGTTCTCAATCTTCGACTGAGCAATCTTGAAAGCCAAAAGTTGCAGCCAGCAAAACTACCACCTCAATATCAAAGAAGGGCTGAGCCACACGATACGACAAGCGATATTACAAAGAAAACATGAGGTGATTGGTATCTATTATGGGCAATTTGAAACGCACAAAGCAATGTGAAAACAGCCGAAGAAGCATGGATGGATGTCATGCAACGTAGCAATGTTAAGGTATTAATCAATATGCAAGATGTGAAGCAA…
Isoform_5508	GGACTGAGCTTGACGGAGACTGGAGATTACTTTCAAGAAAATTATCGAGGAAACACCTTTTTTGGGTATTGAGCTTAACAGGATTGTCCATTGAAGAGATTTACTGGGTCAAAGATGAAAGTGGACGATGACAACATGGAACCGGTGACCAATTTAGGACTCGCACTTGATTATTCTAATCAATGCAATCAAAGAAGATTGAACAATGGTTCAGGTGCAGGTGCAAATGCAGGTTCAAGGGTAGATATGACATTTGTGGCCGGCGACCCCTTGTCAGAATTAGTTTGGTCTCCGCGTAAAGGTTTAAGTGTCAAATGTGCTGAGTGCGGCTTAGCTCAGGAAATACCCTCTCTTTTGGGGGGTGCAGGACTGACCAGTGTGACTCTTCAACCATCCCAA…
Isoform_55307	ATAGTATCTTTCTATAATTTGGGTTTGGGGTTTCTGTGTGTGGGGTTCACTGGAGCTCCCTTTGCTCCAAATCTGAAAGGAGGTGATGGTATACCCCAGCTGCTATTTCATGATTGCCCTTTCGGTGCGCGCTTAAGACATACATAGTTTGCACACTGAGGGTGAGCATGAATTAGGAGAAGGGGTTTTCTTGATCTTTTCTGTATTGGAGTGAAGGGAGCTCCCTCGGGTTCTTCTTTCAAACTTTATGAGTGTTCGTTTTCTTGATTTTTCGTTTGGCCGCATCCCGTTACGTTCTTCTGTGCGCCTGCGGTATCGAGCAACATCATAAATCAGGAAGTCACTTCTTCATTTTATTTATGAGAAATGCTTTGTACAGTTGTAGCTTCATAACTCATT…
Isoform_5548	TTTTTTTTCTTTTCCTTTCCTTTCTTTTCTCTTCTTGCTTTCTTATCGTTTACTCCTTGGATTGAACATTATGTTTCTCACACACAGTTGGGTTGTATCCTTTACCTTTTGCTACCATTGATTTTTTCTTATATGCTAGCCAGACCTCTATTTGGAACGAAATCTTCCAGCTTTCAGTTACAGGATGGCGATATTTGATTTGGAAAGCCGTTCGAATACGGTTGGTAAAGTCTTGAATGAAAAAATGGTGTGCCAATACGTAAACAAGATCACCTGCAAGGGCATCTGGTTTGGATATAGTCCGTTTGACTACACCTCAACGACTATGATGGCCCAGCTCGTTATCATCTTCCTTGTTTCCAGAATTTGTTATCAATTGCTACGACCTCTTCGTCAAAC…
Isoform_5558	gttgAATTAGGCAAGTGGCATCCCGTTGATTGTAGGATTGAGATTGTGTCGAGGTGATATTGGCTGATTTTAACATGGTGGTGGATTATTGTTGATAATTAAAAAGGATTCATTAAAAAATAACAAGTGCACTACGATAACAAGACATTATAGTGAAAACAACTAAAAAAAGTAAAAAAAAAAAAAAAAAAAAAATCCTTGTACACTAATTAAAACTGTTAGAAAGTTTAAGGGATCTAAGATTTTAGAGAGGAAAGTGACACTCCATATGATCGAATTTCTCTTGGGGTTTTACACCCCTAGAGCTCCTCTTATTTATAGAGAGCATTTGGCTTACATCCAAGCCAATAGGAGATAATTGGAGATCAATTCTAATGTAATATCGAATTGCGAATATCC…
Isoform_5564	CAATCTTTGTATGGTTCTATTTGCTCATTGTCTCTTAAGAATTTCCCTTTGATGTTTAAGAGTCTATATTGTGTTTTTGATATGTGTTAATTGTCAGTTTTAACAGTCCTTTAAAGGTCAGATTTATGTGTCTTTAATAGTTTTTATGGTGTCGTTATAGTGTTCTATGGGAAATTAGTAGGGGTTTTAAGTTCTGTTAGTAGTGGGTCTTTATTATCATTATGTGGGGCTATAAGTCTTATGATTAGCTTTGTAATCCTATTTTGGAGGATATCAATGAATGAATAAAAAGTTATATTTTGTGTGATTCACAATTTTGAGAGGTGTGATGACTTCTCCCTTTTCTAGGTGTGATGCCTAGAACCCTACTGGTGTGATGCCAGTAGGCCATTCCTGTCC…
Isoform_55686	CATCGCAACATATCCAAATTACACGGGTTTGACCATTGTACGGTCTTTTTCACCCGATCATTACGAAGGCGGAGCATGGAATACTGGTGGATCGTGCACTGGAAAAGTAAAACCTGCCATGGAAGGTGAACTTGTGGAAAATGGGTTTACCAATATAATGCATGAAAAACAGGTGACAGGTTTTAACCGGGCAGTAAAGAAGCAGATGAACAAATCGAAATTGAGGTTGATGGATATTACTGAAGCATTTGGGTACCGTCATGATGGGCATCCAGGTCCGTATAGGAGCCCTGACCCGAATAAGATCACGAAACGTGGTCCGGACGGGAAACCTCCACCACAGGATTGTTTACACTGGTGCATGCCTGGTCCGGTTGATACGTGGAATGAGCTTGTGCT…
Isoform_55779	GTCAGACGACTTATTTAGAAAAAAATTACTGTAGAGAAAAGATCAGAGTCAGACGATGCCAAACCCTAAGGTTTACTTCGACATGACGATCGGCGGTGCCCGTGCCGGCCGGATCGTGATGGAGCTCTTCGCCGACACCACCCCTCGTACGGCGGATAACTTCCGTGCTCTCTGCACAGGAGAGAAGGGCGTCGGCCGTAGCGGCAAGCCTCTTCACTTCAAGGGCTCGGCCTTCCACCGTGTCATCCCCGGGTTCATGTGCCAGGGAGGCGATTTCACTGCCGGAAACGGTACGGAGGCGAGTCGATTTACGGATCTAAGTTCGCCGATGAGAACTTCATCAAGAAGCACACTGGACCTGGAATTCTGTCGATGGCGAACGCTGGACCGGGGACGAAT…
Isoform_56159	ATTGTTTTGATCGAAGCTTTTGCTTCTGGGTCTTTTAAAAATGTCAGCTTTAGAAATGTCCCACGTCGATTTAGAACAAGGGGTGCACCGACGTTCCGTCACCGGAAGCGACGTAAGTGGGGAAGGGAGCATTTGTTTCTCCGATGCCGACGAGGGATCATGCTATTCTATCTTCTATTCAACCGCCGGTGGGTCATACGACGAGTACAGGTTTGATTGCGTGTCTGAACGTGAGATTGGCGGCGTTGTCGATTCTCGAAGAGCTTCTTCAGCGTCGGTTTGTTCGGTCGAGGTTGGAGTCGTCGATGGCGAGCTAAGTGAAATTAAGGTGCATTTGGATAAAGTAGAAAGAGATTGCAGAATTTGTCAGCTGAGCTCGGAGAGTAGCAATCCTGAGTC…
Isoform_56308	GTGGTGTAAATGAAGACTATTACGACCAGAATATTGGTATATATTACAAGTCTGACATGGAATTTATAGATACCGGGAAGAACATGCCGGTAGCAGAATCCAGCTCTCAAAATATTAATATTCGGATGAGGAACTTAAGAAGTTTTCCAGAGGGAAAAAAGAATTGCTACACCTTGAAACCTGAAAATGGAAAAGGCGAGATGTACTTAATCAGAGCTCATTTTTTATATGGGAATTATGACGGAAAAAATCGACCCCCAACATTTGACCTGTACCTCGGAGTTAACAAATGGGTCACAGTTTCTACAGAAACTGAAAATCACCAAGAGATTATTCATTATTCATTCACAGATAAGATCGACGTGTGCCTTATTAATACTGGCTCGGGAATACCTTTCA…
Isoform_56505	TCAACTCCGTCCACGACTGGTCAACCGTAAAATACGCCCTTGACGTGGGTTGTGGCCGTGGCATCCTCCTCAATGCTGTCGCGATGCAGCTCAAGAAAGCTGGGAGTTCGGGTCGGGTAGTTGGATTAGACCGTAACAAAACAACAACCGTTTCAACGCTACGTACTGCCAAAATGGAAGGCGTCCAAGAATACGTCACCTGTCGGGAAGGTGACGCACGCAGGTTGCCGTTTAGTGATAATTACTTCGACGTGGTGGTGTCGGGTGTGTTCGTTCACAGGGTGGGGAAGGAGTATGGAGGGAAGCGCGCGGCGGAGGCAGCGGCGGAGAGGATGAGAGTGGTGGGGGAGGTGGTGAGGGTGATGAAGCCCGGTGGTGTTGGGGTACTGTGGGACCTAG…
Isoform_56618	GCCTCAATGAGGCCATCCCGGTTAGCGGCCTCACATTATAATTATCTTTGATAATTAACTTTTTTTCTTCTATTTATCACATTAACCAGTCTAATCACATAGAGAATGAATGATGTGGTTATATCCACATCATGTCATATGAGGCCGCGGCCTCAGTGAGGCCATGAATCAGTACCCTTTAAACCACCTCCCTACTAATGTAACTATGTTTCACTTTATAGCACAAGAGTCTCGAATGAACTGGGAGCTGGGCGTCCACAAGCTGCACGTTTAGCAGTATGCGTGGTCTTACTCATGGCCATTTCTGTGGGGCTTTTAGTTGCATTAGTACTCGTATTGATACGAAACATCTGGGGCTATGCCTATAGCAATGAAATAGAAGTTGTCAGATATGTTGGA…
Isoform_56960	GTCAGACGACTTATTTAGAAAAAAAAATTACTGTAGAGAAAAGATCAGAGTCAGACGATGCCAAACCCTAAGGTTTACTTCGACATGACGATCGGCGGCGCCCGTGCCGGCCGGATCGTGATGGAGCTCTTCGCCGACACCACCCCTCGTACGGCGGATAACTTCCGTGCTCTCTGCACAGGAGAGAAGGGCGTCGGCCGTAGCGGCAAGCCTCTTCACTTCAAGGGCTCGGCCTTCCACCGTGTCATCCCCGGGTTCATGTGCCAGGGAGGCGATTTCACTGCCGGAAACGGTACCGGAGGCGAGTCGATTTACGGATCTAAGTTCGCCGATGAGAACTTCATCAAGAAGCACACTGGACCTGGAATTCTGTCGATGGCGAACGCTGGACCGGGGACG…
Isoform_57323	cagGGCGGTGGCATATCGACAAATGTCATTATTGTTACGCCGACCGCCAGGCCGTGAGGCTTTCCCAGGGGATGTTTCTATTTACATTCCCGTCTCTTAGAAAGAGCCGCTAAACGATCGGACCAGACAGGTGCAGGTAGCTTGACCGCCTTACCCGTCATTGAAACACAAGCTGGAGACGTATCGGCCTATATTCCCACCAATGTGATCTCCATTACTGATGGACCAAATCTGTTTGGAAACAGAGCTCTTTATCGCGGAATTAGACCTGCTATTAACGTCGGCTTATCTGTCAGTCGCGTCGGGTCTGCCGCTCAGTTGAAAGCTATGAAACAAGTCTGCGGTAGTTTAAAACTGGAATTGGCGCAATATCGAAGTGGCCGCCTTTGCTCAATTTGG…
Isoform_57364	CTCTTCGAGGGGTGTGGTGCGGTATCTTTAGTTTTAGAGGAAGAAAAACAGACGATTTGTAAAGCTGTTTTATCAATGGCGGGTGTATCTCTCCAGTGCGGAGATTGTGGTGCCCTCTTGAAGTCTGTACAAGAAGCTCAAGATCACGCAGAGCTCACCTCTCACTCCAATTTTTCCGAGTCCACTGAACCCGTCCTCAATCTTGTCTGTTCCTCTTGCGGCAAACCCTGCCGATCCAAAACAGAAAGTGATTTGCATACCAAGAGAACTGGGCATACTGAGTTTGTGGATAAGACTATGGAGGCGGCGAAGCCCATAAGTCTAGAGGTCCCTAAGCCAGTTGCGGAATCCGGGGACGATATGGACTTAAGTAGTAGCAATCCCGAAGAAATGGTTGTG…
Isoform_57380	ATCGTGATGGAGCTCTTCGCCGACACCACCCCTCGTACGGCGGATAACTTCCGTGCTCTCTGCACAGGAGAGAAGGGCGTCGGCCGTAGCGGCAAGCCTCTTCACTTCAAGGGCTCGGCCTTCCACCGTGTCATCCCCGGGTTCATGTGCCAGGGAGGCGATTTCACTGCCGGAAACGGTACCGGAGGCGAGTCGATTTACGGATCTAAGTTCGCCGATGAGAACTTCATCAAGAAGCACACTGGACCTGGAATTCTGTCGATGGCGAACGCTGGACCGGGGACGAATGGGTCTCAGTTCTTTATCTGTACGGCCAAGACTGAGTGGCTTGATGGGAAGCATGTGGTGTTTGGACAGATTGTTGAAGGGATGGATGTGGTGAAGGCGATTGAGAAGGTT…
Isoform_57741	AACACCACAAAAACTCGATCTTACTGTCATGTAAAGGTTAGGATGCTCTCGAACCCATCACCGTGCCTCGATGGAAGGTGGCCTAATCAGATGTGAGTGTGAGCCCTGTGCTATCCCATCTTCTTGGCGCTCATCTCAGTCTGAGATACATGTCTCATCATTGTTGAAGACGGAGCTGCTTAACCATCGTTGGGTACGTAGGTTCGCCCAAGATCCAGCATGGTCGTGACCCTTATCGTTGACAACGAGATCTGGTAAGAACGATTAGAATGTTTACCGACCCATAACCCTTTTCCCATATCTTTCTTGAATCAAGAATCTAATAATACAGTCACCAGTACCGATAGTTTAAGATCCTCTGTTATTCAATCTTTTACTATAATCGCTCGATTGAGGTAT…
Isoform_57967	AACAGTCCTTTGCTTCTTCCAGACACTATTTACTATACTATTGATAGCAATTACAAGCCAAGGGGCAGGAGAATTCTTTGGAGCTACAGTAATGAGCATTAAGAGGGCTGGCATGATTGCTTCATTAGTACTGATGTTGTTTCTTCTCACAGGAGGTTATTATGTCCAGCATATACCTAAATTTATGCAGTGGTTGAAATATGGATCATTCATGTATTACGGGTTTAGGCTTTTGCTGAAAGTGCAATACTCTGGGGAAGAATTATACGAGTGTGAAAGCATAGGAGGATGCCGGACTTTGCAGAGTTCGCCTTCATTCGATACCGTGAACTTGAATGGTGGCTTAAAAGAAGTTTGGGTTCTATTGGCAATGGCACTTGGTTATAGGTTGTGTGCTTA…
Isoform_581	GAAAAATCTGGATAGTCACCATTTAAGGTGACCTTCCATATATATAAACGTAATCTCCTCATTACGTTATATTTCAACACTCCCCCTTGGAAGGTCACAAAATATGTTGCCTCATTAAAACCTTGTTTGGAAAACCCACGGCCTAGATGGGACAAAACCAAAACTAAGGAAAAAGAGTACAACTTTTGTGAGTTCCAATTTTACAATTTCAGACATGCCTCAAAAAACCTAGCTAGTAAAACCCAATGGAAAAAATCTAGACTAAGAAAAAAAAAGAGTACAGTCCTTTTGATGCTTGGTTTCTCCCCCTGATGTTGAACTCTCCTTGAAGATGAACTTTATATCGTGCATACCAACCTCGTGTACGAGCTTTCGCTTGATGACGATTTATTTCCTTCC…
Isoform_58266	GGCTTAATCACATTACCTATCTCATTGAGCAGAACAAGGCACAGCTGGTGGTTATTGCACATGATGTTGACCCAATAGAGCTCGTTGTTTGGCTTCCTGCTTTGTGCCGCAAGATGGAAGTTCCTTATGCTATTGTCAAGGGCAAGTCACGGCTTGGAGCGATTGTCCACAAGAAAACTGCCACTTCTTTGTGTCTTACATCTGTAAAGAATGAAGATAAGATGGAATTCAGCAAGATTGTTGAAGCAATTAAGGCCAACTTCAATGACAAGTATGAAGAGCAGAGGAAGAAGTGGGGAGGTGGTATCATGGGATCTAAATCTCAGGCCAAGACCAAAGCAAAGGAGAGACTCTTAGCCAAGGAGGCTGCACAAAGGATGTCTTAGAGTGGTTGAGTAT…
Isoform_58311	ACAACAAGTGCAATTCAAAACACAAAAGCAAATAACAAGAAAAGAGTTATTATTCACATTTTCGTTCCCACATCCAATCAAGTCATCATGGACATGAAGAAGATCTTCTGTGTTGTTCTCATCGCCGCGGTCTTCATGAGCCCGGTCATGGCTGCAGATGCTGCTGCTGCAGGTGCAGGTGCAGGTGCGGCCGGTGCTGCCGGGGCAGCAAAAAATGCGTCAGCCGCTGCACCCACTACAGCAGCCACTTCCACAGCTACTGCACCAACTGCAGGAACAACCACCAGTACCGCTACTGGAGCAGCCGCTCCTGGTCCTGCAAAAAGTGGATCACCATCAACCTTCCCGGTTGTTGAGTCTATGATTGGTGCCTCACTCTTGTCCTTCTTGGGCTTTCTG…
Isoform_58577	GAGAGAGGAGTAGGGTTACAATTATGGTCAATGACCATTTAATGGGGATCCTTTGTGATCTTCCATTTACCATATATACCGTAATTTCCCCAATTACGATATATTCTAACACTCCCCCTTGGAAGGTCACAAAACACGTTGCCTCGTTAAAACCTTGCTTGGAAAACCCACGGCCTAGATGGGACAAAACCAAAGCTAAGGAAAAAGAGTACAACTTTGTGAGTTCCAATTTTACAATTTCAGACATGCCTCAAAAACCTAGCCAGTAAAACCCAATAGGAAAAAACTAGACTAAAAAAAAAGAGTACAGTCTTCGTTGATGCTTAGTTTCTCCCCCTGATGTCGAACTCCCTCTGACGAAGAGCAGGATTGAAATCGTAGAGACTTCTCATTCCAATT…
Isoform_588	TTTTTTTTTTTTTTTTTTTTTTTTTTTTTTTCTCTTCTTCCACTTAACTCGTATTGAACTCTTCACATTCACATACTTCATTAAACTATGCTTGTATGGAGGTGGAATATTGAGTAGTGATTCTATTCCGATAAAGTCCATATATGCATGTTTCTGTGGAGAATTGTCTTACTGCTCCAAATTCTTTGCACCTTCTTCCACATGTGCATTGACTTGGTCGGCTCCTGGCTATGAATGTTCTTCAAAGCTTAATGGTCACTGTAAATTACGAACTCCCCGTGCATCAGATAGTGCTTCCAAATCTTCTGAGCTTTGAAAATAGTATAAAATTCCATGGGTAGTCCATTTCAATCTAGTTTCCCCATATATTTCACTAATAAACTCAACTGGATAACATGA…
Isoform_58829	AATTTTGAGAGGAACAAAAGAAAAAAATACTCAAAAATATTTAAAAGTGTCATGAATGAGAAAAATAGGGCCTTTAGAGAGAGAAAATAGACACTAAAAGTTGGCCGAATTTCTCCTTAGGGTTCAACCCTTCGTGGAACACTTTATTTATATATATAGTCCTTGCTTACAACCCAAGCAAGATAGGGTTGGTTGGTGACCTAATCCAATAAGGAAAAGGAATCCTAGTGAATATCCACCAACCATAATACGTGTCATTACGTATTTATAACACTCCCCCTTGGATATTCACGAACACGTTGCCTCGTTAAAACCTTGCTTGAAAAACCCACGGCCAAATGGGAGAAAACCAAGTCGAAGGAAAAAGAGTACAACCCTGTGAATTCCAATTACATATAG…
Isoform_58969	TTGCCCCAGTTTTTGGTATGGTTCCTACTTTTGGGTTCGTTAGACCTGCAGCATTTTTACCCGCAGTTACCGAGGAGGATAAAGTTATATTGAACAACGTTCAGAAAGTTGTGGAGTTCTTGACTGCAGGAAGTTCGATATCCCGATCATCTAATCAGGGTGTAGATGTTGCTAGAATCATCCAAGAGCTTCTTCCCGTGTTGCCCAGCATCTCGGTCACAATTGTCCCGGAGGTGCTTAGTCGGTTATCTTCTCGGGTGTTTGCTCGCTTAATTCGAGATGCATTTTTGAAGTGAAGATTTTGAAGCTAAACTCTTAAAAGTCCGTTATTGTGGGTATGTTAGTTGATGAAATTATATATAAAATGAAAAGTGATTTTTTTTTCCTTTTTCTTTTCTT…
Isoform_59828	CTGCAAGAATCGTTCTTTCCACTGCCGGGGAACACTACTTTACATCCACATTTCCCCGCCAATGCATCTTGGGACAAAAGCTAGCAATTAACGTCACAACAACCTCTACCGCCAGCCCACCTTCTCCTACCGCTCCCGCACCTTCACCCACCGCCACTCCTCCCTCGAGTATTGCCACTCCCCCCTCGAGCACTGCCACTCCCCCATCTAGTCCTGCTAGCCCACCTTCTACCAGCGCTACTCCTCCATCTACATCCACATCTCCTCCAAGCTCAATCACACCCATCACTCCAGGTCCAACAGGTAGTGGTGCCACCCCTCCAATGCCTGTCAGCTCTGCGCCATCTTTTGTTGCTGCTGGATTCCCCGCTGCATTCTTAACCATTATCGTGGCTTTAT…
Isoform_6000	CCCTTTCTTCCCGTGAACCTCTCATGTGCATTGACTTGTTCAGCTTATGAATGTTCTTTAAAGCTTGATGTTCATTGTAAATTAGAAACTCCCCGTGCATCAGATAGTGCTTCCAAATCTTCTGAGCTTTGAAAATAACATAAAATTCCATCATAGGTAGTCCATTTCAATCTAGCTTCCCCAAGCATTTCACTAATAAGCTCAACTAGACGTCCCTCCTGAGATAACAGGACAACACACTCTATCTCAAAAATCTTAGAAAAGTTTGGCAGTGTTAGCACATGTGCATGACTCGACATCTCCTTGATTAAAGCAAAATCCTTATCCTGCTCTGTTCCCCAGCTAAATCTCCCCCTTTTAAGCACATCTCTCATTGGTGGTAACCCTTCCTCAACTTTT…
Isoform_6015	CGGCTCTCGTCTCTGTTTAGGGCTTCTGAATCTCTCTCTTTTGTTCCCCTCCCAAATTCTGAACCTTCATTTTTCTCATATCTCCAGGACTAGACCAATGGCAGGAAGCAGTGTAGTAGCGGTTTATGGAAACGGAGCCATCACCGAGACCAAGAAATCTCCCTTCTCCGTTAAGGTAGGCCTTGCACAGATGCTCCGTGGCGGCGTAATTATGGACGTCGTCAACGCCGAACAAGCCCGAATCGCCGAAGAAGCCGGAGCGTGCGCCGTCATGGCGCTTGAACGCGTGCCCGCCGACATCCGTGCTCAAGGCGGCGTCGCTCGGATGAGCGATCCACAGCTCATCAAAGAGATCAAACAAGCCGTGACCATCCCTGTCATGGCCAAGGCTCGTATCGG…
Isoform_604	GTGAAAGAGAGAAAGGACCTGAAGCTGAGATACTGCAGGCCAAGCACATCTCAAGATAAATCGTCTGTATCTTCTATATATACACATATTGATATTTAAATATACTCTTTATCTCCCTGTCTGTCTTTTGTACCTTCTTCAACCGATGGATCCGTTTGATTTCGTTTCTTCTATCATACTTCGTAAAGGTTTTGGATAATGCTTGCTCGAATTTCTGTTATTCTACCGTCGGTCTTTCTATGCATGTTTAGTTATTTTATATCCATTTATAGACAAGAATGAGCTTGTCCAAGAAAGGTACCCGAACCAACGACCCGAAGCTCCACACCACAAGCAAGGCAACAACCTTGAACCCAAATGCAGCAGAGTTTGTTCCATTTGCTCTTAGATCACCATCGG…
Isoform_606	TTTTTTTTTTTTTTTTTTTTTTTTTTTTTTTTGCATGAATGTATAAATATTATTATTGATTCATGTAAACGAACCATTAATAAGCTCTTCTTTTCAGAGTCACCATATAACCACACCAAATTAATCACACACGTTCATTTCAATAATAAATTAAAATAATTAACTTGCTCTCTTGTTCAGTAGTCCTAGATCCTCTCTCTGCACTGAAGGATTTATTAAAAGCAACACAATCCATGCCAATACCTTCACTGCAGAAAACGACATATTCTTCTTACACGCACGAGAGAAGAATGCTATGGAAGCCTAAGGATGAGAAGGGAAAAGAGGTGCTAGAGGTGGAAATTTGCCAAACTTGGGGTGGTGGAAGTACTTTTTAGGAATCTTGGGAATAGGAGGTAG…
Isoform_60606	TGATCTCCATTACTGATGGACAAATCTGTTTGGAAACAGAGCTCTTTTATCGCGGAATTAGACCTGCTATTAACGTCGGCTTATCTGTCAGTCGCGTCGGGTCTGCCGCTCAGTTGAAAGCTATGAAACAAGTCTGCGGTAGTTTAAAACTGGAATTGGCGCAATATCGCGAAGTGGCCGCCTTTGCTCAATTTGGGTCAGACCTTGATGCTGCGACTCAGGCATTACTTAATAGAGGTGCAAGGCTTACAGAAGTACTGAAACAACCACAATATGCACCACTTCCAATTGAAAAACAAATTCTAGTCATTTATGCAGCTGTCAAGGGATTCTGTGATCGAATGCCACTAGACAGAATTTCTCAATATGAGAGAGCCATTCTAAGTAGTATAAAACCAG…
Isoform_607	GGTTCTTCCTGAGATAGCATGACTCCAATGCTTCCAGCACGGGCATCACACTCTACCTCAAAAATCTTAGAAAAGTTGACAATGCTAGCACAGGTGCATGGCTCAACTCCTCCTTAATTAAAGCAAAATCCTTATCCTGTTCTGCTCCCCAGTTATATCTCCCCCTTTTAAGCACATCTCTTATTGGTGGTAACCCTGCAGATAATTCCTTAAGAACAAGATTACCATACTCAGTCAATAAGGGTTTTAATACCTCAGGAAGTTCCTGTGTAGGTGCAGCTAATTCATCATTGGATACTAACACAATACCTTCCTCGACTTCTTAAAGATTGGATTCGAACTCTTCTCGTCTCTTGGACAGTATGAAAGCCCCAAAGTCCTCTTTGGATGCGGGAGTAA…
Isoform_6127	TTTTTTTTTTTTTTTTCCTTAATATTATTTTATTAGGCAATGATTGTGATGCCAATTGATAAGTTGGGCTGATGGTGCTTTTGTCATTGAATCGTCATCTTCCTTTGAGACAACAGTTGATGTTGAAGAGGGAATGGAGATTGATAGAGGTTATATCTCCCCACAATTTGTCACAAATCCTGAGAAATTGATTGCTGAATTTGAGAATGCAAGAGTTTTGGTTACGGATCAGAAGATATCAACAATAAAGGATATAATTCCCTTGTTAGAGAAAACTACTCAATTACGAGCCCCTTTACTTATAATTGCTGAGGATGTAACCGGGGAGGCATTGGCTACCCTTGTTGTGAACAAGCTGCGGGGTATCCTTAATGTTGCTGCCATCAAAGCACCTGGTTT…
Isoform_6238	AGGTGTCACAGAAACCTGTACAGGGTTAGTACCAAAATAAGGAGTATCCTCAAAGAAAGTAACATCCATGGAGTAATAAGTATGACGAGTAACTGGATCATAACACTATATCCTTTGGAAACAGATGAATAACCAAGAAAAATGCAACGAATTGCCTTGTCATCCAATTTGTACGAGATGGACTCCTATTCTGGACAAAACTAGGTGCACCCAAAACACGAGGTAAAATGGGAAAAGAGAGTAGTATCAGGATGAAGGACATGAAGCGGAGCCTTACCTGACAAGATTCGTGAAGGGGTACGATTAACCAGATATGTAGCAGTAAGGACTGCCAAGTGCCAAAAAGATTTGGGAACATTCATACCTCGAAGGAGACACCGAACAACACACATAAGTTGA…
Isoform_628	TTTTTTTTTTTTTTTTTTTTTTTTTTTTTTTTGCATGAATGTATAAATATTATTATTGATTCATGTAAACGAACCATTAATAAGCTCTTCTTTTCAGAGTCACCATATAACCACACCAAATTAATCACACACGTTCATTTCAATAATAAATTAAAATAATTAACTTGCTCTCTTGTTCAGTAGTCCTAGATCCTCTCTCTGCACTGAAGGATTTATTAAAAGCAACACAATCCATGCCAATACCTTCACTGCAGAAAACGACATATTCTTCTTACACGCACGAGAGAAGAATGCTATGGAAGCCTAAGGATGAGAAGGGAAAAGAGGTGCTAGAGGTGGAAATTTGCCAAACTTGGGGTGGTGGAAGTACTTTTTAGGAATCTTGGGAATAGGAGGTAG…
Isoform_6302	AGGGTTTCAGTAGGCTTTGAATATCGATAGTGGCGTCTCCTCCTGTTCTTCTCCATCGCTTCGATCTTCTATCACTGAATAATTCTGTTTCTATTTCACTCATAATCATTATCATGCTTCCATTCATTACGGCAATCCTCCATCATATTCCCTAATTCGAGTGTCCAACAAATCCGACCATCGTGGTATGTATTTTCTTCAAAAGGCCCTACGATTGAGGTAACAGATTCTAGATCCTTCTCCCAGCTTTCAACAATTTTCTATCTCTGTAAAAGACCTTCTCTCTTCGCTCAAGCATATTGGTCACAACCGAAGAGAATTCAAGTGTTCAAATTCTAATAAGGTGTTTGAGCTTTTGTGATTTGTATCTAAGCAAATGCTAAATATCTTCCATGTATC…
Isoform_6313	CTTTCCTCTCTCTCGTGATATCATCTTCATTTTCCCGAGAAAACTCAATATACAGGCTTCCTGGTCCCGGTGCTTGAAGCTTTGTTTTTCATTTTTGTTAAGCTTGACTCATTTCTTATTCAGACAGTGTGTATATGTGTTTTACGACATTCTTATAGCAGGCAAGTTGGGCAGGCTTTCCTCCATTGCAATATTATTATTTTTAGGGGAAGGAGCCTTTTTGCAATTGTAAATCTAGATTGAAGGCCAACAGAATTAAGAACTGCAAAAGCATTCCGGGATCCCTGTAAATGGTTTAATGACGTAAAGGCTTGAATAAAGTTACACATACTCTTGATCAAGCTTACTCCATTTGGTGATTCACTACATAAATTTTATTCAATGGGATGGAGGGAGCTT…
Isoform_6512	ATTTCTTCCATCTCTTCAACCAATTTCAATTCTCTTCCTCTCAGTAAGATCTTCAGTCAACTGACAATTCTGCCACTTGTTAAAGGCTTTCGACTCCGCCATGGACGCAGCATCTCAGCTCGTCGTCTACTGCGGAATCGAGCCTTTCCGTCGTACAATCTCTTTGAAGAACTCTTCATTTTCGACCAGACTTAAGGTCCGTAGACGGTCCAGTGTCATTCTTGCGGTGTCCACTGAGCCCAAACCAACTCAAACCGAATCTTCTAAATCTCCGCCACCGAATGTCATCAATGGTTCCTCAAAATCTTCGCCGGCCAAGCCCATTAACGGACTTTCCACGAGGATTGGAGATGTTTCACAAGAGATTAAAAGAGTCAGAGCACAGATGGAAGAAAACGA…
Isoform_662	tATTTTTGGCTGATTAGTAGCTAGTTGGACACACTGAAGAATCGATGTGTACCTCTGCCTTGTTTGCCAAACTCATTGCATCTAATAAGTTATACACATTTTGCATGCTTAACTGCTTGATCTCAATCCCCGGCCCCTTAATATACCTTGTGATATATTGATCTTCATTCTCCCTTATACAGTGTTTTCAAAAGCGGCGCCTAGGCTCTGAGCGGTGGCCCAGGCGCCTAGGTACCCCCTAGGCGTTGCGTTCTCTGCCTAGAGTGCTTAAGCGCCCGAAGCGATGCTTAGCGAAGCGTTGTCTAGGCGTTTTTTTTTACTTTTTTAATTTTTTTTAACCAATCTTTATTTCTAACCGTATATCTAGTTTTATTAAGGTTTTAAAATCTAGACTTTTGA…
Isoform_6633	ACGCCGGTGACGTTCGTGGACAACCGGACAGGAAGATTTTTATTTATTTACTTCTTCTGTCTCCCTCTCTCTCTATTCAGATGGGAAAGAAGAAATCAGAGGCGGCCGGTTCCGGCAAGGATAAGCCGAACACCAAAGACGGAAAGAAAGAAAAAGTCTCAGTCTCAGCTATGCTAGCCAGCATGGACCAAAAACCTGAGAAAATTAAAAACACATCTTCGAACACTACTTCTGGAAAGTCCAAGAGCAAGGCGTCTCAGAAAGCTTCGTCATACACTGATGGCCTGGATCTCCCTCCCTCTGATGATGAAGATTATGAGTATGCCTCTGGAGAAGAGCAAAATCAGAATGAACGGCAACAGAGGTCCGAGTTAAAGCCACTTGAAGTGTCCATTACTG…
Isoform_6652	GAACAAACCAGAGAGGAGAATTAGAATTATGGGTGATGCTCGGCGTGAATGGAGGGTGTGGCGACGGTGATGGTTCCGGCTCCTTGAATGGCAGTAACCACTGGACGGGATCGGCGGCAAGGATAAATTCCCCTGATTTGAGGTAGGTATTTTATAAAGACCAAATTTGTGGGTTCCTGGGTTTCTCTCGTGATCTCAGTTTCTTTTTTAGGATTGGTTTATATCGGCGAGGGGATTAATTTCTGGGTTTGCAGGGTTATGGATAATTTGGTTACGAGTTTAGATGGGATTGGGAGTAGTGCAGTGGCAATATATTGTGAGTATGATAAAACAACATTGCTTCATTGCCTTATTAGGACATGGCCTTGGGGCTTCAGGAGTGTTGTACCTGTGTAGTTC…
Isoform_6664	AACATCGTGATCATCTATGGTGCTTGCATCTTTCAGTTCTAATCCATTGCTAAGATGCCTTCGAACACGCTCTGAGAACTCATGAAAAATATTTCTTAATGGAGCAGAGCTGACAACTCCTGAACCATCAGTTTCAGAACAAACATTCTCAAAGTGCCTTCCAAAAGGGATCACGCCATCAAGTGTACACTTCGAGAACTCTTTCAGAGTAGCTAGGCCCAACTCTCTACAGTGATTGTAACGAAATTTTGGGATTAGATTAGTGGATGAGAAGACAGATTGTTCGACCAAAATCATGTTCTTTCTTGGTTGATTGCATCCATGATTACTTTGAGAAGAAACTTCATCGTTCTTGTTCTTAAAAATATTTGAGACTTCAGCATTCGTATGGGAAAGTTC…
Isoform_6684	AGTCCAGAAATGTGGTCAGTTAAACCTCCAAAATTTTTTGCAGCAAAGACATTCGTTTTCATTATCCGAAACGCAGCATAGATACTTACTCTGAGAGTTGAAAAATTGTTTCTGATGATATCTTGGCAAAGTTTCACCGGCACTAGCTCTCTAGCATCGTCGTCAACATTGCGTTTGTCAATTCAATCTCTTTGTTCGTACCCTACTTATTGTTCTCTGAGATCCCAGGTAGAACCATTAGAATCAAAACCCACAACCAAAATAAAGCTTACAAGTTTGACCCATAGGGGTCGTGGTCATGGTGTTCCACACGGTGGAAGAGACGAAAATATTTCTGGAATTCAAGTGCCAAGACAGAAGTACATACCCGTTTCCAAGGCAGAGCTTTTGGATGCTATT…
Isoform_6686	CAAGCACTAGTTGGTGATGTAATCCAACGAGGAAATAAACTCCTTGTTTATATTTGGTTACTCTCTGTCAACCGCAATTGTAAAAAAAAAAAAAAATAGAAAAGCTTAAACATACAACGGAGTACAGACGCCGGTGACGTTCGTGGACAACCGGACAGGAAGATTTTGATTTATTTACTTCTTCTGTCTCCCTCTCTCTCTATTCAGATGGGAAAGAAGAAATCAGAGGCGGCCGGTTCCGGCAAGGATAAGCCGAACACCAAAGACGGAAAGAAAGAAAAAGTCTCAGTCTCAGCTATGCTAGCCAGCATGGACCAAAAACCTGAGAAAATTAAAAACACATCTTCGAACACTACTTCTGGAAAGTCCAAGAGCAAGGCGTCTCAGAAAGCTTCGTCA…
Isoform_6772	GGCATCTCGGCACATGATGAACGGCGAGGCTCGGGTTTTAGAAGGGGTTAACCCAGAGATTGAGGTTGGTTTGGGGGATCACGTTTTGTCTGATAGGAGCGCATTGATATCTTCCAACTCGGAGGATGTGCCTGAATCTCCTAAGTTGTTCGATTATGACGAATGAATGGAAGATGTAGGTTAGGACGGGGATCCCGAGAACGGCGGCCGGAGGTAGGCTTGGGCACCTCCGGGACAGGCTCAAAAATAAATAATGGGGACGTGAAGCCTCCTTTGGAGGCCTAATACTCCGACGCGGAGGATTCAATTGTGCCCATGACCCTTTATAAAAAAAATTATGGTTTTCCCAAAGAGCCATGGAACTATCATCGTTATTTCGAACTTCCTCCGGAAGAAGAG…
Isoform_6939	TGACACAAATGGAAAGCAAATAAACGTAATAAACTTTGACTCTGACATAAAGGGAAACAAATCACCCTAATTAAATACTTGACCAAATAATAATATTCGACATATTACAACACTCCCCCTCAAATTGATGGTGGTGACACACCAAAATCAATTTGCAAATTGCACCAAAATTGCTCCACAAACGAAGAAGAAATGCTCCACAAGAAACGCTCAAATGAATGCTCCAATAAGTGCTCAGAAGTGCTCCCCTTAACTTGAACTCGGGTCTTCAAATGCTTCGGAAGAAATTGTGCCAATAAATATCTCAACTCGACATGATAGGTGGAAAACACTAATCCAGAAAATCACAAGACAAAAGGTAACTGCATCGAGCAATCAAGTACCAAAAAGTGGTAACCA…
Isoform_694	GAGCGAGGCCTTTTTTCTCTCTCATTCCGTCATTCATCTCCGAGGCCATTCATTCGTTATTTTATCAGGTGTTTGCTTTGTGTTTTAAGCATTTGGACCTGAAACGAAAGAAGAAAACCCTAACCCTATCACTGCTCAGATGATTTCTTCTTAGTCGCAGGAGATGGTTTTCGAAACCCTAAAGCTCGAAGCTCAACATCCCGTCTCCATGTTCCATCGGCGATTGTTTCACCCAGCTAAAGCATTCTATCTTATCGTGGTTCTGGCATGTACCCTTTTCTCCCTTGCTACATGTGAATCCATGTTCTACAAAGGGGTTGGAGAAATCTGCTGATTTTGATGCTTGTGGGTCCTACAGTGATAATTTTAATGAAGGTTTTCAAAATATATTTGTTGGTG…
Isoform_698	ACTCTCTCACATCGCTGAATTTCTCTCTCTTACTGTTTCTCAACTCTCAGTTCTCTCTCCCGACTCCCGCAATCGGCCCGTTCTCAAATTAGGGTTTGGAGTCGATTAAGGTGTGATCGATTAATTATTATTTCGCGTTTATTTTACGTTTTTCGTTGGTTTTTTTTATTTGTTCTTGGAACCCTCGACTACAACAGTTTATATCATAGGTTTCATTTCTTCTTGCTATTATTTTACAGATCTTTTGATTTTTTTTTTGTTTGGTATCCATTGTTATTTGCCATATAATCTGTTATTTTATTTGTGGTATCTTTTTGGCTTTCACCGTTTCTCAATTCGCAGTTATCTCTCCCGCGATCGGCCCGTTCTCAAATTAGGGTTTGGAGTCGATTAAGGTGT…
Isoform_7065	AAAGGCAAAAGAACGGTTTGATACTTCGTCATTTTAACCCAAAATCCCCATTTTCTCCCCACCCTTCTCTGAAAAACAGGACACAGAAGACATATAGACATAGATATAGATATAGATATATATAGAGAGAGAGAGAGAGAAAGAAAGAGAAGAATCTCATCTTTGTTCAGACCTCTGTATTGTAATGGTGGGATCAGAGAAGCGGACATTTTCGGAGATGTGGTGATGGTGATTTTGGTGTGACAAAGAGCGGTGAGGTTGGCGATCCTTGATGCAGTGACGCCTTTTCGCACAGATTCAGTGGGTAATTTTTTTGGCCGGCGAAACGTTTCTGATAAATGAACGGCGAGAGTGAAGTCGCGGCAGCTCCGGCGGCCCCACCGCAGCCGCTTGAGTGGA…
Isoform_7074	TTTTTTTTTTTTTTTTTTTAAGTATATTACTTCTATCCTACCGTATAACCACACACTTTCAGTTTCAAACCTGAATTTTTATCTTCCTAGCCACCTACACATACACCACCATATTTTTTCCTTACAAATATTCCTTACTGTCACGACCTTACAATATCACTTTTCTTGCATCCCCTTTCAATATCGATTTTCTTACGTTTACTAAATTTTTGAATCTGATTTTTTATAGGGTGATGTTACGTACATCCACCACTTTGTCACTCTCATCCCACAATCATTGGACGAAAAATACTCTTTTATTTTTTATTTTGTATATCACACATTTTTAGGTCTTTTTTTAATTTTAAAAATAATAAGATAATAATATATTTACATACTCTATTTACACATCTGAGAAGT…
Isoform_7163	TGGCTCATTTAGTAACAGTTTACTATAGATTGATTATGAAAAACTTTAGTTTCGGTTTGATAAGTACAGGCTCATCCATGTGGCTGCGTAGAAATTTTCAGAATTTTATGGATTTCGATCCGTTTTACTGCATGCTTCTTGCTGTTTTTCTGTTAGCTTTGTATCTATGGCTTTGGAGAAGGAGAAAGATGCCCTTTCAATTGAAGCTAATCGTGCATCTCATTTTCTTTCTTTTTACTTTTTTTGTGGTCGCACAGATCCGAAGTTCTTTCTTTATTGCCGTAGGGGCCATTTTTTCCTCTACGTGTATTATGATGAATTCTTTTGGAGCCGGGGGGGATGACCATCCTTCCTCTTCCTTTTTTGAGGGTATTTCAGCCTGGGTTCAAAATACCCCCG…
Isoform_7208	agGGGTACATAAGAGAACTCGAGCATTTTGTCGCTGATTCTTCTGAACCTAATCATCCTCTGAAGCTGTTGACAGTTTGCTTATAGCTTTCTTATGGCTGCTGCAACTGCCTCTTCCTCTGCCCCCCGATATGCACCAGAAGATCCTACTTTACCAAAGCCTTGGAAAGGTCTAGTTGATGGGAAAACTGGATATCTTTACTTTTGGAATCCAGATACCAATGTGACCCAGTATGAGAGGCCTGGTGGTTCAGTTCCACCACCGAAGTCTTCTTCAGTGCCTATAAGTTCTTCTGTTCAAGCTCAGCAATCTTCTCAAGGGCAGCGTAGAGATGAGGAAGATGATAGGTATGGCAGGGGTATCAATGGTGCTTCAAAATTTTCAACAGGAGCAAAGACT…
Isoform_7339	CGGGAGAAACATCTTGAAAACTTAGGTTTTTACGCCCGGTGCAAATATGGATAGAGTGTTGGGAGAAATACCTTGAAAAGTTAGGGTTTTACACCCCTTTTTGTCTCTGCATTCCAGAATTCTTCTCCCAACTCCGCTTGGTGTTGTGCATGAATTGGTATGTGTTTTGATTGAAGGGTTGTGCATTGTTGCATACAGCGATGGCTGGACAACCATCATCTCTTAAGAGATCAAATTCGTCAATTACAAGAGAAGGGGATCAGCTTATTGTTACCCCTCTAGGTGCTGGCAATGAAGTGGGTCGGTCCTGTGTATACATGTCTTACAAAGGGAAAACTGTATTGTTTGACTGTGGAATTCACCCTGCTTACTCCGGCATCGGTGCTTTACCATTCTTTG…
Isoform_7813	acaTCTCATACTGGTCAAGCCCTAACTCACCTGTAACCTCTGTAGCCTTCGACAGTGCCCGATGTAAAAGAGCAGCTCGAGGATCTTCACAGAATGGCGGGAGAAACATCTTGAAAACTTAGGTTTTTACGCCCGGTGCAAATATGGATAGAGTGTTGGGAGAAATACCTTGAAAAGTTAGGGTTTTACACCCCTTTTTGTCTCTGCATTCCAGAATTCTTCTCCCAACTCCGCTTGGTGTTGTGCATGAATTGGTATGTGTTTTGATTGAAGGGTTGTGCATTGTTGCATACAGCGATGGCTGGACAACCATCATCTCTTAAGAGATCAAATTCGTCAATTACAAGAGAAGGGGATCAGCTTATTGTTACCCCTCTAGGTGCTGGCAATGAAGTGGGT…
Isoform_7871	TTTTTTTTTTTTTTTTTTTTTTTTTTTTTCAGATTTGAAGGCCTATGAAATTGGGAGGCCATTTTTTTAACCTATAATATTTTTTTAAAGATTTGGAGGCCTATGAAATTGGGAGGCCGTTTTTAACCTATAATTTGTTTTTCTGGATTTGAAGGCCTATGAAATTGGGAGGCCGTTTTTAACCTATAATTTGTTTTTCAGGATTTGAAGGCCTATGAAATTGGGAGGCCCCATGTTTTTAACCTATAATTTGTTTTTCAGGATTTGAAGGCCTATGAAATTGGGAGGCCGCATACCCCTCTAGCCGCCACTAGTCTTGAGTTCATAATTTAGTATGCGGGTTCATCACGGATGTGGTAGTCCTTATCTTTGTTCATAATTTAGTATGCGGGTTCATCA…
Isoform_8046	ACTCCTGAACCATCAATTTCAGAACAAACATTCTCAAAGTGCCTTCCAAAAGGGATCACGCCATCAAGTGTACACTTCGAGAACTCTTTCAGAGTAGCTAGGCCCAACTCTCTACAGTGATTGTAACGAAATTTTGGGATTAGATTAGTGGATGAGAAGACAGATTGTTCGACCAAAATCATGTTCTTTCTTGGTTGATTGCATCCATGATTACTTTGAGAAGAAACTTCATCGTTCTTGTTCTTAAAAATATTTGAGACTTCAGCATTCGTATGGGAAAGTTCATTTTCTGCCAAAATACACAATTGAATTGTTATTTAAAAAAACAAAAAAAGAAGAAAAGTCAAAGAAATAATATTTTTTGAACTTGTTATACCTTTCTTAGATGCAAGGTCGGAG…
Isoform_8080	AAGCACTAGTTGGTGATGTAATCCAACAAGGAAATAAACTCCTTGTTTATATTTGGTTACTCTCTGTCAACCGCAATTGTAAAAAAAAAAAAAATAGAAAAGCTTAAACATACAACGGAGTACAGACGCCGGTGACGTTCGTGGACAACCGGACAGGAAGATTTTTATTTATTTACTTCTTCTGTCTCCCTCTCTCTCTATTCAGATGGGAAAGAAGAAATCAGAGGCGGCCGGTTCCGGCAAGGATAAGCCGAACACCAAAGACGGAAAGAAAGAAAAAGTCTCAGTCTCAGCTATGCTAGCCAGCATGGACCAAAAACCTGAGAAAATTAAAAACACATCTTCGAACACTACTTCTGGAAAGTCCAAGAGCAAGGCGTCTCAGAAAGCTTCGTCATA…
Isoform_81	TTTTTTTTTTTTTTTTTGTTATTGGGGATTATGCGCACGGAAGACGGTATGAGATCTGGGGATTCTCCTGGGATTTTTGTGAAGAACAGGAGCTCTACAGGATGTTTAATTATTAAAAAGAAAGGAGATGGGTTAGGTGGAGCTGGGTCTTCAGGTCTGCGGAATGTTTTCGAGCCGAAGAAAGAGAAGAAGAGGCCGCGATTGGTTTTAAGTGATTCGGAGTCGAGCGATGAGCTATCGGAGCCTTATCGGAGAAAAATTGTATCTCGAGCCAGTGAAGTTCGTGATGGTTTTGAAAAGCACATTGTGGAAGGGAGCGGAATTGATATGAAGAAGAATAGGTTGGAGCATATTAAGTACAGAAACGGTGACGACCAGAGTGGAAGAAAGAGAAGTACG…
Isoform_8183	CAAGCTCTTGGTGACTGCTTTAAACCATAAAGGGATTTTCTAAGGCGACACACTTTACCCTGATACTCCCCCTGAGCCTGAAAACCTGGTGGAGTACACATATAAATGACTTCATCAAGATCACCATTAAGAAAAGCATTCTTAACGTCAAGTTGGTAAAGAGGCCAAGAATGAGAGGCAGCAAGTGATACAAGTAACCGGACAGTATTCAGTTTAGCAACTGGAGCAAAGGTTACTGAAAAATCCTTCCCTGGAATCTGTGTAAAGCCTTTAGCAACAAGGCGAGCCTTATATCTCTCAACAGTACCGTCAGCTCGATACTTAACTGTGAATACCCATTTGCAGCCTACTGCCTTCTGTCCTGCAGGGAGAGAAACAAGATCCCAAGTATGATTATTC…
Isoform_8220	acaacttcctcacaCAAAACTGAGTAATCACACAGAGTATTTGCTAAATTTAGGGAGTTTAAAAATGGAGGCTCCAAAATTCAAGATATTCCAACCAATAACTAACAGATAAAGATCAATAACAATTGGATAGATTGCTTTTTACTACCCAACGAACTATAGCATTCCTTCATCCATTTTATCCATTCTTTCATTAATCTACAGGAGATTTTGATTCTTTTAACTAAATAACCCTAAAACTTGATTAACATCAGAGAATTTCAGATTAACCTATTCTATCTATTAATTACAGTTCCCTTTGACTCTTCTTCGTCTCCACCATTATCCCCATTTTTAAATTCTTCTAAACCATTTTGTCTCTCTCTCTCTCTATTAATCGGCCATTGCTTAAATCAATGT…
Isoform_8226	GAACATCCATGGCTCTCTTGCATCTTACCCCTTCTCAGTCATCTTTTCCACAGTGCCTGTCCGCGTTTAGTGCTCGAACCCGAATCAGACCCGTCCGAATATCCATAGTCAAAGCTCAAGCCGGCGTTCGCCAAGAGAACATTGTTATCGTCGGTGCCGGTATTGCCGGCCTTGCTACCGCACTTTCCCTTCACAGGCTTGGAGTTGGATCATTGGTGCTTGAGCAAGCAGAGTCCCTCCGGAAAGGCGGAACCTCACTTACCCTTTTCAAGAATGGGTGGCGGGTATTGGATGCAATTGGAATTGGGAAAGATCTCCGAAGCCAATTCCTTGAAATTCAAGGGTACATTTTCTTTTTCTGTTTCATTACAGCTAGGGGTGTAAACAGTTGAGTGGAGT…
Isoform_8403	ACAGACGGGAAACGCGCCCCAGTCGCCTCCGCCCCTGAGCTAACCGGGCACAGGCCCTTGCTGGCCCTTAGTCACCTCCGCCCCTGAACTAACCAATGAAGAAGAAGAAGAAGGAAGTTCGGTTTTCATACGTGAGAGGCTTTATGATAATGATCCGAGTGTTATGGGTGCAGCACTCTACCCCTTTTTTGATTTTATCATGATAGATGTTAATTCTTATAAGGAATTAGTCATCAACTTTGTAAGCATCCTTAAACAAGTATCCGAATGCAGTGGAATCCTCTCTCAGTTGAGGATTTGCACCAAAGCTCATCTACAAAAGAGGTGGACATAATTTACAACAAGAAATCTGATCATCTGGTCCTTGGGTCTGCTAATTGCTAGGGTTTGCGTGATCAA…
Isoform_8446	ACCACATACAAAATAAAAGATTTTGGAAGTTGTGTTCGTTTCGGAGGTCGGAGAAGATCTCCGATCTAAGAAATGATCACTCGCTCTAAGCTCGTTGAGCAACTCAGAGATTCTCAGATCCGATCTGAACACAAGTGTCCCGCTCTCGTTATTTTCTCTCCCAAGCTCCATATCTCTTCATGGTACATTTATCTCCCCTCCTATATATACGTGCGCAAACAAATTATATAATGTTGATTTGGTTATATTTGCATTTGCTAAGGTTTGAATTTTACTTTAAACAGATTTTTTTTTGTTCCAAATGATCTTTTTCCACTTTTTTGTTTGTTTGTTTGTTTTTGAATTGGTCTTGATTTCCTGCATTCGTTTGGTTGTGGAGAAAGGGCAAGTAAATTAAAT…
Isoform_8493	GTTGAATTGAAGTGGAGAGTGTGGGGAGCTGGCGGAAGTGAGCAACGCCGATGGATCGCCAACCCGAGACACCGGCTCCTTTTTCGGTGGTCGTTATTGATGCTACTCAGAACAGCCATCATTACCTTCCTTCCCCAGATGACAAAGGGAGGGATAGATGGGAGACACTGGTACTTGCATACAAGACATTAGGAGTTGTATTTGGAGGACTTGTTACTTCTCCACTTTATGTATATCCTTCAATGCCATTGAAGTCTCCAACAGAAGATGATTACTTGGGAATTTACAGCATCATGTTTTGGACTCTTACTCTCATAGGGGTTGTCAAGTATGCCTGCATAGCTCTCAAAGCTGATGATCAGGGTGAAGGTGGGACATTTGCCTTGTATTCATTACTTT…
Isoform_8502	tgaacttccctgtttgGATGCTGAAACATTCCTCGGTCATCTCGGGTGGTAACCAGCTTGATGAAATCGAAAGTGAAACAGATAATTACATGGATGCACTTAATACGATCGAATCAGAATCTGAAACTGATTTTGATTGCCAGACAAAACAAGAAGTGGAGCAATATGTCCCTAGAGGAGATCACATGCTTGAGATTGACGCAAATGATCACCATCATCCATCTCATTTGGACTCTCATTCTGCAACATACAATTCCACCGATAAAGTTATGTCCTGTGATTTACCCAACTCAGTTCCCTTGGAGTTTGTCCATGCAAAGTCACCTGAAATTGTTGGAAAATCTGATCCAGGCACCTCACCAGGCACCGACAATGATAACATTCTTGAAGCTTCGCTTT…
Isoform_8657	CGGCACCCTCCTCTGTGATTGGCCATCAACAGCGACGGCACTAGCCAGGTGGGTTTCTTCCTCGCTTATTGTTTTTTTTTTTTTTTTTTTCGTCTTTCTGTTTACACTGCCAGAGGCAGAGAACACATCTTCTCCATCCATCATCTCTCCTTTTCTTGACTGCCATTAGAGAGAACATTAGATCCATTTAACAGAGTTTCATCATCTGTCCTAGATCTTCAAACATAACTAAAGAGAGACAAAGCCTCTTTGGCCGACGAGAGAAGGAGCATTGGTGATGACGTGCTGCAGAGGCAGCGTGGGGCGGTAACGGCAGTAAGTCCTCCCTTCTTTCTTCTTTCCCAAACCAAACCAAGGGATTCGACCCTTGATTTCTTGTCGTGTCCCCTTTTTCTATAC…
Isoform_8674	TAAAAAAAAAAAAATAGAAAAGCTTAAACATACAACGGAGTACAGACGCCGGTGACGTTCGTGGACAACCGGACAGGAAGATTTTGATTTATTTACTTCTTCTGTCTCCCTCTCTCTCTATTCAGATGGGAAAGAAGAAATCAGAGGCGGCCGGTTCCGGCAAGGATAAGCCGAACACCAAAGACGGAAAGAAAGAAAAAGTCTCAGTCTCAGCTATGCTAGCCAGCATGGACCAAAAACCTGAGAAAATTAAAAACACATCTTCGAACACTACTTCTGGAAAGTCCAAGAGCAAGGCGTCTCAGAAAGCTTCGTCATACACTGATGGCCTGGATCTCCCTCCCTCTGATGATGAAGATTATGAGTATGCCTCTGGAGAAGAGCAAAATCAGAATGAAC…
Isoform_8739	AGAATCTCATCTTTGTTCAGACCTCTGTATTGTAATGGTGGGATCAGAGAAGCGGACATTTTCGGAGATGTGGTGATGGTGATTTTGGTGTGACAAAGAGCGGTGAGGTTGGCGATCCTTGATGCAGTGACGCCTTTTCGCACAGATTCAGTGGGTAATTTTTTTGGCCGGCGAAACGTTTCTGATAAATGAACGGCGAGAGTGAAGTCGCGGCAGCTCCGGCGGCCCCACCGCAGCCGCTTGAGTGGAAATTCTCTCAGGTCTTTGGCGAACGGACGGCCGGTGAAGAAGTTCAGGAAGTCAGGAATAACTCAGAATTCAGCAAGAAATCTGGGAATAACATAGACAAAGTCGACATCATTTCAGCGATTGAGTTTGATAAAACTGGAGACCATCTTG…
Isoform_876	CAGTGGACAAACAGAAACTTCTGCTTCATTTGGGGCAAATCTCCTTTGGCAATATTAATTCTGAAAGGGACAAAATTTCTTTCAGATAGTTTGGCTACGTGTGAAGATTCAGCTCTGTTGGGCAAATCTCCTTTGGCAGTAACTAAGTTTCCTCTATTTGGGCAACTCTCCTTTGGCAGTAATACTCAAGGAGAGTATATCTTTGTTGGAAACTTATAGTTTGTAATTCACTTGGAACCCTATCCAGAATACTGGGCAAATCTCCTTTGGCAGTTTAGATTTTTTCACTGGCGAACGTCATTCTGACCTGTGGGGAAAAGTTCATTTCGCATTGTTCTATTTCCTTTAGAAGTTTCTTCTTGTGGAAACTTTAGTCTATTTGTTTGGGCAAATCTCCTT…
Isoform_889	AATCCGACTACTGTCTCTCACATCGCTGAATTTCTCTCTCTTTACTGTTTCTCAACTCTCAGTTCTCTCTCCCGACTCCCGCAATCGGCCCGTTCTCAAATTAGGGTTTGGAGTCGATTAAGGTGTGATCGATTAATTACTATTTCGCGTTTATTTTACGTTTTTCGTTGGTTTTTTTATTTGTTCTTGGAACACAACAGTTTATATCATAGGTTTCACGGTTGCATTTCTTCTTGCTATTATTTTACCGATCTTTTGATTTTTTTTGTTTGGTATCCATTTTTATTTGCCATATAATCTGTTATTTTATTTGTGGTATCTTTTTGGCTTTCACCGTTTCTCTCTCCCGCAATCGGCCCGTTCTCAAATTAGGGTTTGGAGTCGATTAAGGTGTGTTTG…
Isoform_9240	GACGGTTTTCGTTGTTTCACTTTTGATCAGGAGCGGTTCAGAGATCCAAAATCTTTGGTTAAAGATCTCCACCTTAATGGTTTCAAAGCAATTTGGATGCTTGATCCAGGAATCAAACAAGAAGAGGGTTATTTTGTCTATGATAGTGGTTCTGAAAATGACGTATGGGTTCAAAAAGCTGATGGAAGGCCTTTTCTTGGGGAGGTGTGGCCTGGGCCTTGTGTTTTCCCCGACTATACTCAGTCAAAAACTCGTTCTTGGTGGGCCAGCTTAGTTAAAGATTTCGTTTCTAATGGTGTTGATGGTATATGGAATGATATGAACGAACCAGCTGTTTTTAAGGCTGTAACTAAGACAATGCCTGAGAGCAATATTCATAGGGGAGATGCTGAACTTGGA…
Isoform_927	GTTCCATAACCCGATCTGCTGTAGCTCAAGAGTACCTCCACTCTCTTGCTGCTATCACTCCCTCTCGGCAGTTGAGCTGCTCCAATCCCACCACCTACTCTCTCTCCCATTCCTGCAATTAGTATAATATTCATTCATTTCCTCTAAGTCATTAAACCATCTGTACTTTCTCTCCCTCATCTTTATCTTATAATGAATTCAGAACTTATAATGAATTCAGAAATTTAGAGGGAGAGAGAGAGAGAGATGCCTCTGGTAAGGTGTACGGTGAGGAATGAGTACAGCTTGGGATTGCCGGAGCTGTACAAAGAGGCGAACAGAGAAGATCCCAAGGCTATACTTGATGGCGTAGCTGTTGCTGGTCTTGTTGGGATATTGCGGCAATTAGGCGATCTCGCT…
Isoform_9412	AACCATACCCCACCTAATTTGCCCATGTCCCTCATGACCCTAAAGAAAAGTCCTATAAATTCCATCCAACTCTTTATGAATTTTGTTGGGCACTAAGAAACAACTCATGATATAAGTAGGCGTAGAAGCTAAATTAGCTTGAGTAAGAGTGAGTTTACCAGCCTTTGAAAGAACCTTTTGCTTTTAGGTAGTCAATTTAAGCTTAGCTTTGTCAACAATAGAAGAATTTGGTATTCTCTTGTCTTATCCAAATTGGACTAAGACCGTTTATTTATAATAACAAATATTTACAAGGGGGACAAAATACCCTTGGCCCAAATACAAATAATAAACACACTAAATAAACAAGCCCAATTAACCACGTATTCCAACACTCTCCCTCAAGCTGGTGAGTAGATA…
Isoform_9525	TTTTTTTTTTTTTTTTTTTTTTTTTTTTGCGCTCAGCAACACCATTCTACGCCATTCTATTATGGGGTATAAGGACAAATAAGTTGTTGAAGTATACCTTGTCAACTAAAACAAGAAACAAAGTCATCAGAAAGATACCATTATCAGACCGGAGTCCCCTAACAACCACATTAAACGAAGTTTTGTTAAGTTGCAGAAAACGAGTAAACAAGGGAAGGACCTCTGATTTTTTACGCAACAAATAAATCCAAGTACACCTGCTATAATCATTAATAAATGTAACATAGTATCTATAACCAGGGGAAGGTCTGGACATCAGAATGAATAAGATCAAAGAGAGATGGAGATCGATGCATACGAAGAATATAGTTGTTCCGAACACGCTTAGAAAGAGCACAC…
Isoform_9569	ATACTTACAGAGAGGTAGACTACATGAGATAGAAGCCAGAGAGAGAGTTCTTGAGAGTCGGTCTAGGAAAGCGAGAATTTGGGCGAGAAATGAGAGAGAGAAAATTTATTCAGAGTGCTTAGATTTGCATGCGTTTGAATTTGAAAAAAAAAACTAAATATACAACTATATTTATGGATTGTTTCTTGTGATCTGTCTCTCAGACAACAACAACTGGGTTGGAAAAAATCCGAAGCCCATCAGTTACTTTCTCTCTCCCCCTCTGTCTTCTCTCTCTACCAACCTCTGCTGAAAAGTTGGCTGTGCTTAAGGCGGAGGGAAGGGGGTTCTTCCTTCCCTGTGAGTTGCCGAGATTTAGGGTAAATTTGACTTGGGTTTTGATCCCCCTAGATTTTGCAT…
Isoform_9581	aGAATCCGGGGCCGGATAAACGAAATCCGGGGGATCCTCTTTACACATCCCACTAGGGCGCTCCTTCTATCGGAGCCAACCCTTTTACGCTATTTAAATGAGATCGAAACGAATGGAACGCGGCAGAGCGCTCCCTATATGCGGGTAGTACGCGCCATTCGTAATTCGAATCTGATTCTTTAGTCTTTCTTAGCAGTATCTATTAGCAGCGGAATTCTCCCTTGACTCGATCTTTCATTTCATTATGGAATTCTCTCCCAGAGCTGCGGAACTAACGACTCTATTAGAAAGTAGAATTACCAACTTTTACACGAATTTTCAAGTGGATGAGATCGGTCGAGTGGTCTCAGTTGGAGATGGGATTGCACGTGTTTATGGATTGAACGAGATTCAAGCTGG…
Isoform_9857	TAGGGGGGACAGGATTTGTCAACCAAGATGGTCGGGTGCACTGCCCCATAAACTTGAGTGCAAGCATGGAGGGGCAAAGTTTGTAAATAAACACAACTGCACCCGGGCAAAGACAGGACCGCACCGGAGGGAAAGAAAAAGAAAGAAAAGAAAAGGAGAAAGAAAATAGGAAATTAGAGGGGCATTTTGGTCAAAATGCTCCTATAATTTCCATTTCAACTCCAAATTTTATAAAAAATATATTTTTGGAAACTAGAGAAAAAATGTGATTTTCTGGTGCAAAAATATTTAGGGTTAATGATAATTAATTTTTATTTAATATTTTCATGATTAAATTGATTTAATAAATCTAGAAAAATACTAAATGGATGAATTAATGAAAAATATTGTATGCAAATA…
Isoform_9916	ACCAACCGCCGAAGCAAAACCAGTTCATACTTTTTCAATATATTCTTTCCTCTCTCTCGTGATATCATCTTCATTTTCCCGAGAAAACTCAATATACAGGCTTCCTGGTCCCGGTGCTTGAAGCTTTGTTTTTCATTTTTGTTAAGCTTGACTCATTTCTTATTCAGACAGTGTGTATATGTGTTTTACGACATTCTTATAGCAGGCAAGTTGGGCAGGCTTTCCTCCATTGCAATATTATTATTTTTAGGGGAAGGAGCCTTTTTGCAATTGTAAATCTAGATTGAAGGCCAACAGAATTAAGAACTGCAAAAGCATTCCGGGATCCCTGTAAATGGTTTAATGACGTAAAGGCTTGAATAAAGTTACACATACTCTTGATCAAGCTTACTCCATTTG…
Isoform_9938	AGGTAGATGAAAGCAGTGAGTTTTTGCCTTTGGTATATGATCCTGCTACCATCTCTGCATACTGGGGAAAACGGCCACGCGCTGTTGCAACACGCATAGTTCAGTTACTCTCTGTCGCTGGGGGTTTTCTTTCTCGTCTTGCCTGGGATGTGATAAACAAGAAGGTTAAAGAGAATGAAGTTGCTCGAGCCATTGAAATAAGGGAAATTGTAACCTCTTTGGGTCCAGCATATATAAAGCTGGGGCAAGCGTTGAGCATTCGACCGGATATACTGTCACCTGCCGCAATGACCGAGTTGCAAAAGCTTTGTGATAAGGTCCCTTCATATCCAGATGATGTAGCTATGGCTCTTATTGAGGAGGAACTTGGTCAGCCATGGCAGGATATCTATTCTGAAC…
Isoform_9952	catgtcgtgtgAAATTTGTAAAAAAAAAAAAAAAAGAACTATTTGTTCGTTTGCTTATGAAGAATTTTTTTCGTAAAACTCGTCGAATAATCGATTTCTATTCCGACATAGACCGAAAAGGACAATATACAGGATGGATGAGGTAGTAAGGGGTTGTGTGTGATACTTGGCTCGATTCGTGGGTCAAAACTACAGGATATAAAAAAAATACTCCAATCCTGATCCATAGGATTAATTGTGGATCCACCACAACAATAGAAACTTTTTTGTTGTTAGTCTTTTATTTTCTTTATTTGGATATATCTATACTTATATAGATATACCAAGTATAGATATACAAGATCTTAAATCCAAAATATATATATTATATAAAGTCCTTGTATTTTTCTTCGGCTCAAT…
